# Supplementary material for: Conformational decoupling in acid-sensing ion channels uncovers mechanism and stoichiometry of PcTx1-mediated inhibition
Source: eLife. 2022 Feb 14;11:e73384. doi: 10.7554/eLife.73384 (PMC8871370; doi:10.7554/eLife.73384)
Supplement: Figure 1—figure supplement 1—source data 1. [file elife-73384-fig1-figsupp1-data1.xlsx]

## Sheet: Data
K105C_SSD
pH	190816_009	190816_011	190912_000	190912_001	190912_002
7.2	0.844292	0.860462	1.01827	0.935988
7.1	0.583734	0.667929	0.78517	0.864517	0.79174
7	0.053889	0.079536	0.198425	0.273089	0.207722
6.9
6.8	0.001171	0.000451	0.012988	0.006175	0.007525
6.6	0.00124	0.000864	0.012555	0.007842	0.00156
K105C_dF
pH	190816_009	190816_011	190912_000	190912_001
7.2	0.293189	0.295997	0.121788	0.120664	0.065666
7.1	0.687033	0.686409	0.456846	0.389052	0.454008
7	1.31297	0.929307	0.726418	0.734193	0.690651
6.9
6.8	1.31976	1.01481	0.812857	0.960795	0.809033
6.6	0.816166	1	0.946232	0.94049	0.91428
6.4	0.97767	1.07317	0.943195	0.938661	0.983053
6	1	1	1	1	1
K105C-F350L_SSD
pH	200509_008	200509_009	200509_011	200517_001	200517_002
7.3	1.41552
7.2	0.97665	0.798464	1.10347	1.18101	0.956931
7.1	1.03587	0.89679	0.97773	1.06081	1.08049
7	0.619199	0.640189	0.527639	0.638332	0.465487
6.9	0.050569	0.117318	0.040582	0.021837	0.013133
6.8	0.037883	0.005561	0.007689	0.003919
6.7			0.00123	0.004813	0.003346
K105C-F350L_SSD
pH	200509_008	200509_009	200509_011	200517_001	200517_002	200517_003
7.3
7.2		-0.02937	-0.02121	0.120541	0.040564	0.0161
7.1	0.112882	0.016868	0.128048	0.184794	0.110802	0.131211
7	0.162414	0.279957	0.480668	0.535273	0.515737	0.602674
6.9	0.379413	0.684428	0.847525	0.85247	0.583125	0.885547
6.8	0.437207	0.876904	1.0122	0.806994	0.830406
6.7			1.01667	0.820654	0.928085	0.90331
6	1	1	1	1	1	1

## Sheet: Results
Collected Data from Fits										mean	SD	N
K105C_SSD_IC50	7.078	7.066	7.057	7.027					K105C_SSD_IC50	7.057	0.0217715	4
K105C_SSD_hill	15.03	15.19	11.09	14.52					K105C_SSD_hill	13.9575	1.9329	4
K105C_dF_EC50	7.144	7.144	7.089	7.075	7.08				K105C_dF_EC50	7.1064	0.0346886	5
K105C_dF_hill	-9.825	-6.957	-6.233	-6.787	-6.383				K105C_dF_hill	-7.237	1.47614	5
KCFL_SSD_IC50	7.009	6.962	7.005	6.994					KCFL_SSD_IC50	6.9925	0.0212995	4
KCFL_SSD_hill	8.036	13.32	11.18	14.11					KCFL_SSD_hill	11.6615	2.7155	4
KCFL_dF_EC50	6.776	6.945	6.993	7.026	6.962	7.023			KCFL_dF_EC50	6.95417	0.0930536	6
KCFL_dF_hill	-2.707	-7.894	-8.13	-6.736	-4.601	-10.06			KCFL_dF_hill	-6.688	2.64992	6
Nonlin fit of K105C_SSD							Row statistics of K105C_SSD					Nonlin fit of Row statistics of K105C_SSD
	190816_009	190816_011	190912_000	190912_001			pH	Mean	upper limit	lower limit		log(inhibitor) vs. response -- Variable slope (four parameters)
log(inhibitor) vs. response -- Variable slope (four parameters)							7.2	0.914753	1.04165	0.787857		Best-fit values
Best-fit values							7.1	0.738618	0.877198	0.600038		Bottom	= 0,000
Bottom	= 0,000	= 0,000	= 0,000	= 0,000			7	0.162532	0.27742	0.0476448		Top	0.9275
Top	0.8567	0.8683	1.045	0.9389			6.9					LogIC50	7.053
LogIC50	7.078	7.066	7.057	7.027			6.8	0.005662	0.0120154	-0.000691384		HillSlope	12.65
HillSlope	15.03	15.19	11.09	14.52			6.6	0.0048122	0.0112658	-0.00164136		IC50	11302606
IC50	11968460	11629986	11394258	10633003								Span	0.9275
Span	0.8567	0.8683	1.045	0.9389								95% CI (profile likelihood)
95% CI (profile likelihood)												Top	0,9029 to 0,9529
Top	0,8509 to 0,8625	0,8651 to 0,8714	0,9808 to 1,117	0,9075 to 0,9716								LogIC50	7,048 to 7,058
LogIC50	7,077 to 7,079	7,065 to 7,066	7,045 to 7,068	7,020 to 7,033								HillSlope	11,60 to 13,78
HillSlope	14,58 to 15,52	14,99 to 15,40	9,044 to 13,44	12,31 to 18,41								IC50	11177346 to 11426388
IC50	11940958 to 11995609	11613472 to 11646423	11103759 to 11692011	10462866 to 10796729								Goodness of Fit
Goodness of Fit												Degrees of Freedom	2
Degrees of Freedom	2	2	2	2								R squared	0.9999
R squared	1	1	0.9997	0.9999								Sum of Squares	4.895e-05
Sum of Squares	2.779e-06	8.839e-07	0.00029	9.392e-05								Sy.x	0.004947
Sy.x	0.001179	0.0006648	0.01204	0.006853								Constraints
Constraints												Bottom	Bottom = 0
Bottom	Bottom = 0	Bottom = 0	Bottom = 0	Bottom = 0
												Number of points
Number of points												# of X values	6
# of X values	6	6	6	6								# Y values analyzed	5
# Y values analyzed	5	5	5	5
Nonlin fit of K105C_dF							Row statistics of K105C_dF					Nonlin fit of Row statistics of K105C_dF
	190816_009	190816_011	190912_000	190912_001				Mean	upper limit	lower limit		log(agonist) vs. response -- Variable slope (four parameters)
log(agonist) vs. response -- Variable slope (four parameters)							7.2	0.179461	0.312972	0.0459498		Best-fit values
Best-fit values							7.1	0.53467	0.710275	0.359064		Bottom	= 0,000
Bottom	= 0,000	= 0,000	= 0,000	= 0,000	= 0,000		7	0.878708	1.20165	0.555764		Top	0.9753
Top	1.08	1.023	0.9311	0.9631	0.9307		6.9					LogEC50	7.114
LogEC50	7.144	7.144	7.089	7.075	7.08		6.8	0.983452	1.24252	0.724388		HillSlope	-7.856
HillSlope	-9.825	-6.957	-6.233	-6.787	-6.383		6.6	0.923434	1.00733	0.839533		EC50	12986941
EC50	13916520	13936162	12276050	11887290	12015436		6.4	0.98315	1.05033	0.91597		Span	0.9753
Span	1.08	1.023	0.9311	0.9631	0.9307		6	1	1	1		95% CI (profile likelihood)
95% CI (profile likelihood)												Top	0,9324 to 1,019
Top	0,7763 to 1,392	0,9819 to 1,065	0,8341 to 1,043	0,9271 to 0,9995	0,8088 to 1,088							LogEC50	7,096 to 7,132
LogEC50	7,042 to 8,009	7,127 to 7,162	7,025 to 7,135	7,059 to 7,091	6,979 to 7,137							HillSlope	-10,78 to -5,878
HillSlope	??? to -0,4145	-9,211 to -5,207	-15,36 to -2,623	-8,631 to -5,357	??? to -2,135							EC50	12470010 to 13536956
EC50	11007644 to 102097068	13384654 to 14526998	10585985 to 13659511	11452178 to 12330137	9529060 to 13694468							Goodness of Fit
Goodness of Fit												Degrees of Freedom	4
Degrees of Freedom	4	4	4	4	4							R squared	0.9932
R squared	0.7031	0.9922	0.9708	0.9964	0.9598							Sum of Squares	0.003956
Sum of Squares	0.2321	0.003588	0.01796	0.002558	0.02778							Sy.x	0.03145
Sy.x	0.2409	0.02995	0.06701	0.02529	0.08333							Constraints
Constraints												Bottom	Bottom = 0
Bottom	Bottom = 0	Bottom = 0	Bottom = 0	Bottom = 0	Bottom = 0
												Number of points
Number of points												# of X values	8
# of X values	8	8	8	8	8							# Y values analyzed	7
# Y values analyzed	7	7	7	7	7
Nonlin fit of KCFL_SSD							Row stats of KCFL_SSD					Nonlin fit of Row stats of KCFL_SSD
	200509_008	200509_009	200509_011	200517_001				mean	upper	lower			KCFL_SSD
log(inhibitor) vs. response -- Variable slope (four parameters)							7.3	1.41552				log(inhibitor) vs. response -- Variable slope (four parameters)
Best-fit values							7.2	1.00331	1.18583	0.820783		Best-fit values
Bottom	= 0,000	= 0,000	= 0,000	= 0,000			7.1	1.01034	1.10258	0.918093		Bottom	= 0,000
Top	1.227	0.8508	1.091	1.142			7	0.578169	0.675146	0.481192		Top	1.266
LogIC50	7.009	6.962	7.005	6.994			6.9	0.0486878	0.0997489	-0.00237334		LogIC50	7.023
HillSlope	8.036	13.32	11.18	14.11			6.8	0.013763	0.0394675	-0.0119415		HillSlope	7.188
IC50	10213770	9161670	10104980	9859734			6.7	0.00312967	0.00760427	-0.00134494		IC50	10536710
Span	1.227	0.8508	1.091	1.142								Span	1.266
95% CI (profile likelihood)												95% CI (profile likelihood)
Top	0,8240 to ???	0,6768 to 1,057	1,008 to 1,194	1,039 to 1,277								Top	0,9423 to 8,184
LogIC50	6,904 to ???	??? to 7,008	6,991 to 7,023	6,978 to 7,015								LogIC50	6,947 to 7,636
HillSlope	???	5,299 to ???	7,876 to 29,70	8,060 to ???								HillSlope	1,866 to ???
IC50	8021717 to ???	??? to 10191738	9788170 to 10536319	9495679 to 10353373								IC50	8853023 to 43215773
Goodness of Fit												Goodness of Fit
Degrees of Freedom	3	2	3	3								Degrees of Freedom	4
R squared	0.9386	0.9906	0.9983	0.9968								R squared	0.9599
Sum of Squares	0.09627	0.006179	0.002145	0.004776								Sum of Squares	0.08011
Sy.x	0.1791	0.05558	0.02674	0.0399								Sy.x	0.1415
Constraints												Constraints
Bottom	Bottom = 0	Bottom = 0	Bottom = 0	Bottom = 0								Bottom	Bottom = 0
Number of points												Number of points
# of X values	6	6	7	7								# of X values	7
# Y values analyzed	6	5	6	6								# Y values analyzed	7
Nonlin fit of KCFL_dF							Row stats of KCFL_dF					Nonlin fit of Row stats of KCFL_dF
	200509_008	200509_009	200509_011	200517_001	200517_002	200517_003		mean	upper	lower		log(agonist) vs. response -- Variable slope (four parameters)
log(agonist) vs. response -- Variable slope (four parameters)							7.2	0.025325	0.100187	-0.0495373		Best-fit values
Best-fit values							7.1	0.114101	0.171488	0.0567141		Bottom	= 0,000
Bottom	= 0,000	= 0,000	= 0,000	= 0,000	= 0,000	= 0,000	7	0.429454	0.608123	0.250784		Top	0.9543
Top	1.007	0.975	1.016	0.9024	0.9852	0.9482	6.9	0.705418	0.913164	0.497672		LogEC50	6.972
LogEC50	6.776	6.945	6.993	7.026	6.962	7.023	6.8	0.792743	1.05852	0.526962		HillSlope	-5.547
HillSlope	-2.707	-7.894	-8.13	-6.736	-4.601	-10.06	6.7	0.917181	1.04556	0.788801		EC50	9383106
EC50	5966955	8819734	9838268	10628961	9163015	10544004	6	1	1	1		Span	0.9543
Span	1.007	0.975	1.016	0.9024	0.9852	0.9482						95% CI (profile likelihood)
95% CI (profile likelihood)												Top	0,8441 to 1,088
Top	0,7633 to ???	0,8628 to 1,099	0,9696 to 1,065	0,7634 to 1,115	0,8064 to 1,197	0,8669 to 1,035						LogEC50	6,922 to 7,015
LogEC50	??? to 6,904	6,912 to 6,977	6,977 to 7,008	6,944 to 7,088	6,879 to 7,037	6,998 to 7,048						HillSlope	-9,999 to -3,555
HillSlope	-6,671 to ???	-12,68 to -5,290	-10,57 to -6,514	??? to -2,612	-10,42 to -2,604	-20,71 to -6,394						EC50	8351366 to 10355410
EC50	??? to 8015243	8168094 to 9485841	9491700 to 10186500	8792599 to 12252700	7567988 to 10900709	9962495 to 11167157						Goodness of Fit
Goodness of Fit												Degrees of Freedom	4
Degrees of Freedom	2	3	4	4	4	3						R squared	0.9881
R squared	0.988	0.9949	0.9975	0.9596	0.9705	0.9946						Sum of Squares	0.01071
Sum of Squares	0.006012	0.005031	0.002929	0.02907	0.02582	0.004821						Sy.x	0.05175
Sy.x	0.05483	0.04095	0.02706	0.08525	0.08035	0.04009						Constraints
Constraints												Bottom	Bottom = 0
Bottom	Bottom = 0	Bottom = 0	Bottom = 0	Bottom = 0	Bottom = 0	Bottom = 0
												Number of points
Number of points												# of X values	8
# of X values	8	8	8	8	8	8						# Y values analyzed	7
# Y values analyzed	5	6	7	7	7	6
