# Supplementary material for: Conformational decoupling in acid-sensing ion channels uncovers mechanism and stoichiometry of PcTx1-mediated inhibition
Source: eLife. 2022 Feb 14;11:e73384. doi: 10.7554/eLife.73384 (PMC8871370; doi:10.7554/eLife.73384)
Supplement: Figure 1—figure supplement 1—source data 2. [file elife-73384-fig1-figsupp1-data2.xlsx]

## Sheet: Data
V80C_SSD
pH
7.5	1.01572	0.99196	0.988443
7.4	0.981483	1.01678	0.997625	0.797204
7.3	0.788591	0.964387	0.970048	0.579246
7.2	0.806473	0.841099	0.684844	0.451963
7.1	0.128024	0.165265	0.113572	0.121375
7	0.016073	0.022992	0.024634	0.022809
V80C_dF
pH
7.5	0.040724	0.156272	0.052038	0.103257
7.4	0.026055	0.34908	0.281534	0.387657
7.3	0.579855	0.826255	0.748132	0.783078
7.2	0.836658	0.940758	0.931354	0.805224
7.1	0.928892	0.956786	1.00271	0.774135
7	1.03771	0.928828	1.0242	0.95976
V80C-F350L_SSD
pH
7.3	0.94254		1.16254
7.2	0.497696	0.745101	1.03318	1.03318
7.1	0.655704	0.504372	0.488684	0.274762
7	0.080249	0.038472	0.092527	0.1414
6.9		0.004436	0.012456	0.01805
6.8			0.002291	0.001166
V80C-F350L_SSD
pH
7.3	0.013127	0.094655	0.051882	0.028985	0.05931
7.2	0.091211	0.123868	0.277766	0.286188	0.174872
7.1	0.760472	0.729492	0.835897	0.778298	0.78837
7	0.930589	0.898008	0.848802	1.08658	0.845333
6.9		0.897488	0.872487	0.993484	0.834647
6.8			0.860086	1.09747	0.856706

## Sheet: Results
Collected Data from Fits										mean	upper	lower
V80C_SSD_IC50	7.15	7.149	7.172	7.206					V80C_SSD_IC50	7.16925	7.21174	7.12676
V80C_SSD_hill	15.33	14.21	12.25	6.015					V80C_SSD_hill	11.9512	18.5662	5.33626
V80C_dF_EC50	7.311	7.381	7.352	7.394					V80C_dF_EC50	7.3595	7.41804	7.30096
V80C_dF_hill	-12.01	-8.297	-8.351	-9.001					V80C_dF_hill	-9.41475	-6.615	-12.2145
VCFL_SSD_IC50	7.18	7.081	7.115	7.857					VCFL_SSD_IC50	7.30825	7.89403	6.72247
VCFL_SSD_hill	3.591	15.71	9.615	5.315					VCFL_SSD_hill	8.55775	17.1492	-0.0337004
VCFL_dF_EC50	7.14	7.145	7.181	7.156	7.166				VCFL_dF_EC50	7.1576	7.17809	7.13711
VCFL_dF_hill	-15.99	-13.71	-16.33	-6.689	-16.65				VCFL_dF_hill	-13.8738	-8.6845	-19.0631
Nonlin fit of V80C_SSD							Row statistics of V80C_SSD					Nonlin fit of Row statistics of V80C_SSD
	200509_013	200509_014	200509_015	200514_004			pH	Mean	upper limit	lower limit			V80C_SSD
log(inhibitor) vs. response -- Variable slope (four parameters)							7.5	0.998709	1.03557	0.961844		log(inhibitor) vs. response -- Variable slope (four parameters)
Best-fit values							7.4	0.948273	1.11016	0.786381		Best-fit values
Bottom	= 0,000	= 0,000	= 0,000	= 0,000			7.3	0.825568	1.11924	0.531892		Bottom	= 0,000
Top	0.9334	0.9943	0.9946	0.8185			7.2		0.976163	0.416027		Top	0.9965
LogIC50	7.15	7.149	7.172	7.206			7.1	0.132059	0.168517	0.0956014		LogIC50	7.21
HillSlope	15.33	14.21	12.25	6.015			7	0.021627	0.0276617	0.0155923		HillSlope	7.46
IC50	14140720	14082815	14856107	16069755								IC50	16201676
Span	0.9334	0.9943	0.9946	0.8185								Span	0.9965
95% CI (profile likelihood)												95% CI (profile likelihood)
Top	0,7518 to 1,223	0,9549 to 1,034	0,9733 to 1,016	0,4887 to ???								Top	0,9539 to 1,043
LogIC50	??? to 7,197	7,137 to 7,160	7,166 to 7,177	7,083 to ???								LogIC50	7,190 to 7,228
HillSlope	3,728 to ???	11,34 to 18,08	10,78 to 14,08	???								HillSlope	6,314 to 8,931
IC50	??? to 15730069	13705290 to 14453867	14659450 to 15047835	12099694 to ???								IC50	15489285 to 16891098
Goodness of Fit												Goodness of Fit
Degrees of Freedom	3	3	3	2								Degrees of Freedom	2
R squared	0.9697	0.9987	0.9997	0.9754								R squared	0.9997
Sum of Squares	0.02903	0.001302	0.0003505	0.01014								Sum of Squares	0.0002522
Sy.x	0.09837	0.02084	0.01081	0.07119								Sy.x	0.01123
Constraints												Constraints
Bottom	Bottom = 0	Bottom = 0	Bottom = 0	Bottom = 0								Bottom	Bottom = 0
Number of points												Number of points
# of X values	6	6	6	6								# of X values	6
# Y values analyzed	6	6	6	5								# Y values analyzed	5
Nonlin fit of V80C_dF							Row statistics of V80C_dF					Nonlin fit of Row statistics of V80C_dF
	200509_013	200509_014	200509_015	200514_004				Mean	upper limit	lower limit			V80C_dF
log(agonist) vs. response -- Variable slope (four parameters)							7.5	0.0880728	0.172383	0.00376241		log(agonist) vs. response -- Variable slope (four parameters)
Best-fit values							7.4	0.261082	0.519985	0.00217811		Best-fit values
Bottom	= 0,000	= 0,000	= 0,000	= 0,000			7.3	0.73433	0.905906	0.562754		Bottom	= 0,000
Top	0.9545	0.9589	1.009	0.8594			7.2		0.98638	0.770617		Top	0.958
LogEC50	7.311	7.381	7.352	7.394			7.1	0.915631	1.07335	0.757911		LogEC50	7.356
HillSlope	-12.01	-8.297	-8.351	-9.001			7	0.987623	1.0702	0.905046		HillSlope	-8.661
EC50	20487129	24057519	22475855	24784955								EC50	22691806
Span	0.9545	0.9589	1.009	0.8594								Span	0.958
95% CI (profile likelihood)												95% CI (profile likelihood)
Top	0,7983 to 1,242	0,8561 to 1,079	0,9677 to 1,053	0,7114 to 1,173								Top	0,8172 to 1,123
LogEC50	7,236 to 7,355	7,345 to 7,419	7,339 to 7,364	7,291 to 7,456								LogEC50	7,300 to 7,398
HillSlope	??? to -3,997	??? to -4,517	-10,32 to -6,802	??? to -2,505								HillSlope	??? to -3,755
EC50	17199510 to 22635727	22117929 to 26214429	21815996 to 23137725	19531826 to 28603389								EC50	19968836 to 24997755
Goodness of Fit												Goodness of Fit
Degrees of Freedom	3	3	3	3								Degrees of Freedom	2
R squared	0.9821	0.9858	0.9987	0.9614								R squared	0.9935
Sum of Squares	0.01776	0.008679	0.001102	0.02008								Sum of Squares	0.004184
Sy.x	0.07695	0.05379	0.01917	0.08181								Sy.x	0.04574
Constraints												Constraints
Bottom	Bottom = 0	Bottom = 0	Bottom = 0	Bottom = 0								Bottom	Bottom = 0
Number of points												Number of points
# of X values	6	6	6	6								# of X values	6
# Y values analyzed	6	6	6	6								# Y values analyzed	5
Nonlin fit of VCFL_SSD							Row stats of VCFL_SSD					Nonlin fit of Row stats of VCFL_SSD
								mean	upper	lower			VCFL_SSD
log(inhibitor) vs. response -- Variable slope (four parameters)							7.3	1.05254	2.45024	-0.345154		log(inhibitor) vs. response -- Variable slope (four parameters)
Best-fit values							7.2	0.827291	1.23832	0.416263		Best-fit values
Bottom	= 0,000	= 0,000	= 0,000	= 0,000			7.1	0.48088	0.730219	0.231542		Bottom	= 0,000
Top	1.224	0.755	1.186	~ 3188			7	0.088162	0.155578	0.0207456		Top	1.084
LogIC50	7.18	7.081	7.115	~ 7,857			6.9	0.0116473	0.0286461	-0.00535145		LogIC50	7.121
HillSlope	3.591	15.71	9.615	5.315			6.8	0.0017285	0.00887574	-0.00541874		HillSlope	7.409
IC50	15120503	12041485	13042138	~ 71914678								IC50	13212700
Span	1.224	0.755	1.186	~ 3188								Span	1.084
95% CI (profile likelihood)												95% CI (profile likelihood)
Top	-1,525 to 2,613	0,7084 to 0,8059	1,163 to 1,210	(Very wide)								Top	0,9322 to 1,365
LogIC50	???	7,071 to ???	7,112 to 7,119	(Very wide)								LogIC50	7,089 to 7,173
HillSlope	???	11,80 to ???	8,933 to 10,40	???								HillSlope	4,796 to 12,66
IC50	???	11773032 to ???	12930311 to 13160154	(Very wide)								IC50	12278631 to 14886905
Goodness of Fit												Goodness of Fit
Degrees of Freedom	1	1	3	2								Degrees of Freedom	3
R squared	0.7225	1	0.9999	0.995								R squared	0.9961
Sum of Squares	0.1078	1.122e-05	0.0001157	0.003649								Sum of Squares	0.003943
Sy.x	0.3284	0.00335	0.006209	0.04272								Sy.x	0.03625
Constraints												Constraints
Bottom	Bottom = 0	Bottom = 0	Bottom = 0	Bottom = 0								Bottom	Bottom = 0
Number of points												Number of points
# of X values	4	5	6	6								# of X values	6
# Y values analyzed	4	4	6	5								# Y values analyzed	6
Nonlin fit of VCFL_dF							Row stats of VCFL_dF					Nonlin fit of Row stats of VCFL_dF
								mean	upper	lower			VCFL_dF
log(agonist) vs. response -- Variable slope (four parameters)							7.3	0.0495918	0.0882866	0.010897		log(agonist) vs. response -- Variable slope (four parameters)
Best-fit values							7.2	0.190781	0.300641	0.0809209		Best-fit values
Bottom	= 0,000	= 0,000	= 0,000	= 0,000	= 0,000		7.1	0.778506	0.827068	0.729943		Bottom	= 0,000
Top	0.9361	0.9036	0.8641	1.07	0.8473		7	0.921863	1.04442	0.799302		Top	0.9236
LogEC50	7.14	7.145	7.181	7.15	7.166		6.9	0.899527	1.00734	0.791711		LogEC50	7.156
HillSlope	-15.99	-13.71	-16.33	-9.32	-16.65		6.8	0.938089	1.28101	0.595172		HillSlope	-12.88
EC50	13796212	13949690	15161439	14131321	14640888							EC50	14317560
Span	0.9361	0.9036	0.8641	1.07	0.8473							Span	0.9236
95% CI (profile likelihood)												95% CI (profile likelihood)
Top	0,7964 to 1,091	0,7084 to 1,210	0,8146 to 0,9150	0,9554 to 1,198	0,7865 to 0,9092							Top	0,8719 to 0,9764
LogEC50	???	7,102 to 7,194	7,164 to ???	7,117 to 7,184	7,144 to ???							LogEC50	7,140 to 7,172
HillSlope	??? to -9,314	??? to -4,104	??? to -10,06	-16,51 to -5,495	??? to -10,34							HillSlope	-18,66 to -9,326
EC50	???	12644323 to 15635126	14597097 to ???	13079136 to 15260029	13943242 to ???							EC50	13801802 to 14865838
Goodness of Fit												Goodness of Fit
Degrees of Freedom	1	2	3	3	3							Degrees of Freedom	3
R squared	0.9998	0.9881	0.9966	0.9903	0.9953							R squared	0.9972
Sum of Squares	0.0001122	0.007906	0.002225	0.009929	0.003247							Sum of Squares	0.002223
Sy.x	0.01059	0.06287	0.02723	0.05753	0.0329							Sy.x	0.02722
Constraints												Constraints
Bottom	Bottom = 0	Bottom = 0	Bottom = 0	Bottom = 0	Bottom = 0							Bottom	Bottom = 0
Number of points												Number of points
# of X values	4	5	6	6	6							# of X values	6
# Y values analyzed	4	5	6	6	6							# Y values analyzed	6
