# Supplementary material for: Conformational decoupling in acid-sensing ion channels uncovers mechanism and stoichiometry of PcTx1-mediated inhibition
Source: eLife. 2022 Feb 14;11:e73384. doi: 10.7554/eLife.73384 (PMC8871370; doi:10.7554/eLife.73384)
Supplement: Figure 1—source data 2. [file elife-73384-fig1-data2.xlsx]

## Sheet: Data
V80C_dF						Transformed V80C_dF
	PcTx 7.7	3 min wash with pH 7.7	3 min wash with pH 8.4	3 min wash mix		PcTx 7.7	3 min wash with pH 7.7	3 min wash with pH 8.4	3 min wash mix
200528_001	0.894251	0.613328				-0.894251	-0.613328
200528_002	0.791784		0.436612			-0.791784		-0.436612
200528_004	0.782285			0.408396		-0.782285			-0.408396
200601_000	0.816054	0.387823				-0.816054	-0.387823
200601_001	0.805899		0.266932			-0.805899		-0.266932
200601_002	0.912167			0.752167		-0.912167			-0.752167
200601_003	1.00707	0.934901				-1.00707	-0.934901
20620_001	0.836529		0.407433			-0.836529		-0.407433
20620_002	0.756594		0.548736			-0.756594		-0.548736
20620_004	0.815567			0.515977		-0.815567			-0.515977
20620_005	0.860568	0.803876				-0.860568	-0.803876
20620_006	0.957707			0.549779		-0.957707			-0.549779
20620_007	0.924841	0.762344				-0.924841	-0.762344
K105C_dF
	PcTx 7.4	3min pH 7.4	3min pH 8.4	mix
200529_004	1.23208	0.723477
200529_005	1.23731		0.276921
200529_006	1.14155	0.123438
200531_003	1.00451	0.598049
200531_005	1.06005			0.116089
200619_001	1.05964	0.8889
200619_002	1.02485		0.35636
200619_003	1.06209	0.885825
201015_012	1.13945	0.840215
201030_002	1.16797		0.264962
201106_001	1.11798		0.219149
201106_002	1.22668			0.209991
201106_003	1.21755			0.300388
201106_004	1.16322			0.36159

## Sheet: Results
ANOVA V80C wash
Number of families	1
Number of comparisons per family	2
Alpha	0.05
Dunnett's multiple comparisons test	Mean Diff,	95,00% CI of diff,	Below threshold?	Summary	Adjusted P Value	C-?
3 min wash with pH 7.7 vs. 3 min wash with pH 8.4	0.2855	-0,002302 to 0,5734	No	ns	0.0518	D	3 min wash with pH 8,4
3 min wash with pH 7.7 vs. 3 min wash mix	0.1439	-0,1440 to 0,4317	No	ns	0.3715	E	3 min wash mix
Test details	Mean 1	Mean 2	Mean Diff,	SE of diff,	n1	n2	q	DF
3 min wash with pH 7.7 vs. 3 min wash with pH 8.4	0.7005	0.4149	0.2855	0.1117	5	4	2.557	10
3 min wash with pH 7.7 vs. 3 min wash mix	0.7005	0.5566	0.1439	0.1117	5	4	1.289	10
Mann-Whitney test V80C wash
Table Analyzed	V80C_dF
Column D	3 min wash with pH 8,4
vs.	vs,
Column C	3 min wash with pH 7,7
Mann Whitney test
P value	0.1111
Exact or approximate P value?	Exact
P value summary	ns
Significantly different (P < 0.05)?	No
One- or two-tailed P value?	Two-tailed
Sum of ranks in column C,D	32 , 13
Mann-Whitney U	3
Difference between medians
Median of column C	0,7623, n=5
Median of column D	0,4220, n=4
Difference: Actual	-0.3403
Difference: Hodges-Lehmann	-0.3361
ANOVA K105C wash
Number of families	1
Number of comparisons per family	2
Alpha	0.05
Dunnett's multiple comparisons test	Mean Diff,	95,00% CI of diff,	Below threshold?	Summary	Adjusted P Value	C-?
3min pH 7.4 vs. 3min pH 8.4	0.3973	0,05592 to 0,7387	Yes	*	0.0241	D	3min pH 8,4
3min pH 7.4 vs. mix	0.4296	0,08825 to 0,7710	Yes	*	0.0158	E	mix
Test details	Mean 1	Mean 2	Mean Diff,	SE of diff,	n1	n2	q	DF
3min pH 7.4 vs. 3min pH 8.4	0.6767	0.2793	0.3973	0.134	6	4	2.964	11
3min pH 7.4 vs. mix	0.6767	0.247	0.4296	0.134	6	4	3.206	11
Mann-Whitney test V80C wash
Table Analyzed	K105C
Column D	3min pH 8,4
vs.	vs,
Column C	3min pH 7,4
Mann Whitney test
P value	0.1143
Exact or approximate P value?	Exact
P value summary	ns
Significantly different (P < 0.05)?	No
One- or two-tailed P value?	Two-tailed
Sum of ranks in column C,D	41 , 14
Mann-Whitney U	4
Difference between medians
Median of column C	0,7818, n=6
Median of column D	0,2709, n=4
Difference: Actual	-0.5109
Difference: Hodges-Lehmann	-0.4941

## Sheet: Graph
V80C
K105C
