# Supplementary material for: Conformational decoupling in acid-sensing ion channels uncovers mechanism and stoichiometry of PcTx1-mediated inhibition
Source: eLife. 2022 Feb 14;11:e73384. doi: 10.7554/eLife.73384 (PMC8871370; doi:10.7554/eLife.73384)
Supplement: Figure 2—source data 1. [file elife-73384-fig2-data1.xlsx]

## Sheet: Data
K105C single vs multiple activations
multiple act (I)	single wash (I)	multiple act (F)	single wash (F)
0.865381	0.823099	0.590164	0.905927
0.834209	0.773491	0.627999	0.981541
0.835528	0.803905	0.760786	0.684842
0.791974	0.946421	0.757192	0.337519
	0.653372		0.690416
	0.752685		0.767528

## Sheet: Results
Statistics
	multiple act (I)	single wash (I)	multiple act (F)	single wash (F)
Number of values	4	6	4	6
Minimum	0.792	0.6534	0.5902	0.3375
Maximum	0.8654	0.9464	0.7608	0.9815
Range	0.07341	0.293	0.1706	0.644
Mean	0.8318	0.7922	0.684	0.728
Std. Deviation	0.03019	0.09598	0.08793	0.2251
Std. Error of Mean	0.01509	0.03918	0.04396	0.09188
Lower 95% CI of mean	0.7837	0.6914	0.5441	0.4918
Upper 95% CI of mean	0.8798	0.8929	0.8239	0.9641
Unpaired t-test
Table Analyzed	multiple vs single activation
Column D	single wash (F)
vs.	vs,
Column C	multiple act (F)
Unpaired t test
P value	0.7238
P value summary	ns
Significantly different (P < 0.05)?	No
One- or two-tailed P value?	Two-tailed
t, df	t=0,3661, df=8
How big is the difference?
Mean of column C	0.684
Mean of column D	0.728
Difference between means (D - C) ± SEM	0,04393 ± 0,1200
95% confidence interval	-0,2328 to 0,3206
R squared (eta squared)	0.01648
F test to compare variances
F, DFn, Dfd	6,551, 5, 3
P value	0.1528
P value summary	ns
Significantly different (P < 0.05)?	No
Data analyzed
Sample size, column C	4
Sample size, column D	6
