# Supplementary material for: Conformational decoupling in acid-sensing ion channels uncovers mechanism and stoichiometry of PcTx1-mediated inhibition
Source: eLife. 2022 Feb 14;11:e73384. doi: 10.7554/eLife.73384 (PMC8871370; doi:10.7554/eLife.73384)
Supplement: Figure 3—source data 1. [file elife-73384-fig3-data1.xlsx]

## Sheet: Data
pH	F350L act			F350L act 30 nM			F350L SSD			F350L SSD 30 nM
8										1.03785	0.0616521	3
7.9
7.8										1.07311	0.15972	7
7.7
7.6							0.837802	0.0610969	5	1.06357	0.0972722	7
7.5
7.4							0.905885	0.145873	5	0.851957	0.323069	7
7.3
7.2	0.000497022	0.000629675	6				0.937695	0.0715364	5	0.252698	0.165064	7
7.1							0.320275	0.265951	5
7	0.000234619	8.92617e-05	6	0.000449914	0.000403713	7	0.0297197	0.034604	5	0.0009969	0.000892018	7
6.9							0.00234804	0.00140592	5
6.8	0.0014395	0.000614995	6
6.7	0.00710413	0.00558415	6	0.00450919	0.00482471	7
6.6
6.5
6.4	0.343295	0.181108	12	0.259466	0.211398	7
6.3
6.2
6.1
6	0.810466	0.181119	12	0.752701	0.164262	7
5.9
5.8
5.7
5.6	0.967935	0.0409221	12	0.972727	0.0628978	7
5.5
5	0.971204	0.0538544	12	0.931263	0.0925211	7

## Sheet: Results
	F350L act	F350L act 30 nM	F350L SSD	F350L SSD 30 nM
log(agonist) vs. response -- Variable slope (four parameters)
Best-fit values
Bottom	= 0,000	= 0,000	= 0,000	= 0,000
Top	= 1,000	= 1,000	= 1,000	1.07
LogEC50	6.268	6.2	7.122	7.293
HillSlope	-2.528	-2.534	14.72	5.659
EC50	1852267	1583428	13241031	19621200
Span	= 1,000	= 1,000	= 1,000	1.07
95% CI (profile likelihood)
LogEC50	6,225 to 6,309	6,140 to 6,259	??? to 7,142	0,9807 to 1,164
HillSlope	-3,072 to -2,114	-3,266 to -1,988	8,842 to ???	7,247 to 7,337
EC50	1680517 to 2036847	1380345 to 1815081	??? to 13872437	3,826 to 8,932
Goodness of Fit				17673729 to 21732751
Degrees of Freedom	70	40	28
R squared	0.9379	0.9274	0.8889	35
Sum of Squares	0.834	0.5575	0.5851	0.8764
Sy.x	0.1092	0.1181	0.1446	1.015
Constraints				0.1703
Bottom	Bottom = 0	Bottom = 0	Bottom = 0
Top	Top = 1	Top = 1	Top = 1	Bottom = 0
Number of points
# of X values	91	63	36	43
# Y values analyzed	72	42	30	38
