# Supplementary material for: Conformational decoupling in acid-sensing ion channels uncovers mechanism and stoichiometry of PcTx1-mediated inhibition
Source: eLife. 2022 Feb 14;11:e73384. doi: 10.7554/eLife.73384 (PMC8871370; doi:10.7554/eLife.73384)
Supplement: Figure 3—source data 2. [file elife-73384-fig3-data2.xlsx]

## Sheet: Data
WT Inhibition
PcTx1 (nM)	2016_07_13_0023	2016_07_13_0032	2016_07_13_0036	2016_07_13_0040	2016_07_13_0044	2016_07_15_0000	2016_07_15_0002	2016_07_15_0004	2016_07_15_0006	2016_07_15_0008	2016_07_15_0010	2016_07_15_0012	2016_07_15_0013	2016_07_15_0014	2016_07_15_0019	2016_07_15_0021	2016_08_03_0000	2016_08_03_0005	2016_08_03_0010	2016_08_03_0011	2016_08_03_0016	2016_08_05_0017	2016_08_05_0023	2016_08_05_0028	2016_08_05_0033	2016_08_05_0038	2016_08_05_0039	2016_08_05_0044	2016_08_05_0049	2016_08_05_0054	2016_08_05_0059	2016_08_10_0000	2016_08_10_0001	2016_08_10_0004	2016_08_10_0006	2016_08_12_0000	2016_08_12_0002	2016_08_12_0003	2016_08_12_0004	2016_08_12_0005	2016_08_12_0006	2016_08_12_0007	2016_08_12_0008	2016_09_16_0059	2016_09_16_0060	2016_09_16_0061	2016_09_16_0062	2016_09_16_0063	2016_09_16_0064
0	19.898	20.75	21.514	19.113	21.673	11.493	14.09	16.294	18.069	17.043	22.006	17.892	16.769	20.11	23.788	11.46	2.624	4.693	6.017	3.954	3.018	1.4	1.635	1.734	1.353	4.582	1.808	1.822	1.389	1.796	3.605	0.849	1.471	1.286	1.255	6.843	4.087	4.134	1.587	0.72	3.772	4.179	6.257	4.464	5.319	3.911	1.982	2.548	2.509
0.1		19.479				11.695						16.667														4.393	1.472									0.661						0.619		4.185
1			16.393				10.493						10.731															0.795				0.016			0.153		0.013						0.123		3.192
3				3.824				7.176						14.892						0.375		0.069							0.018									0.016								0.028
10					10.553				2.125														0.011							0.004			0						0.011								0.005
30	0.141									0.3					3.852		0				0.005			0.005							0.01									0.024								0.014
100											0.517					0.187		0.013	0.2						0.005									0.003							0.03								0.011
1000
3000
WT Inhibition normalized
PcTx1 (nM)	2016_07_13_0023	2016_07_13_0032	2016_07_13_0036	2016_07_13_0040	2016_07_13_0044	2016_07_15_0000	2016_07_15_0002	2016_07_15_0004	2016_07_15_0006	2016_07_15_0008	2016_07_15_0010	2016_07_15_0012	2016_07_15_0013	2016_07_15_0014	2016_07_15_0019	2016_07_15_0021	2016_08_03_0000	2016_08_03_0005	2016_08_03_0010	2016_08_03_0011	2016_08_03_0016	2016_08_05_0017	2016_08_05_0023	2016_08_05_0028	2016_08_05_0033	2016_08_05_0038	2016_08_05_0039	2016_08_05_0044	2016_08_05_0049	2016_08_05_0054	2016_08_05_0059	2016_08_10_0000	2016_08_10_0001	2016_08_10_0004	2016_08_10_0006	2016_08_12_0000	2016_08_12_0002	2016_08_12_0003	2016_08_12_0004	2016_08_12_0005	2016_08_12_0006	2016_08_12_0007	2016_08_12_0008	2016_09_16_0059	2016_09_16_0060	2016_09_16_0061	2016_09_16_0062	2016_09_16_0063	2016_09_16_0064
0	1	1	1	1	1	1	1	1	1	1	1	1	1	1	1	1	1	1	1	1	1	1	1	1	1	1	1	1	1	1	1	1	1	1	1	1	1	1	1	1	1	1	1	1	1	1	1	1	1
0.1		0.938747				1.01758						0.931534														0.958752	0.814159									0.096595						0.148122		0.9375
1			0.761969				0.744713						0.639931															0.436334				0.018846			0.121912		0.003181						0.019658		0.600113
3				0.200073				0.440408						0.740527						0.094841		0.049286							0.012959									0.00387								0.007159
10					0.486919				0.117605														0.006728							0.002227			0						0.006931								0.002523
30	0.007086									0.017603					0.16193		0				0.001657			0.002884							0.002774									0.033333								0.005495
100											0.023494					0.016318		0.00277	0.033239						0.003695									0.002333							0.007953								0.004384
1000
3000
F320L Inhibition
PcTx1 (nM)	2016_08_10_0011	2016_08_11_0004	2016_08_11_0009	2016_08_11_0014	2016_08_11_0019	2016_08_11_0025	2016_08_11_0031	2016_09_14_0005	2016_09_14_0010	2016_09_14_0015	2016_09_14_0032	2016_09_14_0037	2016_09_14_0042	2016_09_14_0047	2016_10_20_0013	2016_10_20_0014	2016_10_20_0002	2016_10_20_0014	2020_10_21_0001	2020_10_21_0005	2020_10_21_0007	2020_10_21_0010	2020_10_21_0012	2020_10_21_0014	2020_10_21_0016	2020_10_21_0018	2020_10_21_0020	2020_10_21_0021	2020_10_21_0023	2020_10_23_0023	2020_11_02_0004	2020_11_02_0007
0	25.017	21.851	16.749	16.233	24.468	1.934	27.656	6.326	9.28	7.851	8.096	8.02	8.801	8.819	7.981	2.931	16.629	10.523	22.539	17.051	17.294	9.407	10.02	11.913	18.942	22.715	6.549	18.759	5.186	6.057	6.697	12.239
0.1
1															9.961	3.673	15.106	11.131	23.675			12.882
3
10														8.73						20.216			12.363		16.379				10.418		5.646	12.416
30
100	24.138									7.213			8.861															2.877
300				16.204					10.088			8.221																		7.886
1000			14.344			0.267		2.422			6.452																0.03
3000		1.694			1.352		0.662														0.02			0.089		0.162
F350L Inhibition normalized
PcTx1 (nM)	2016_08_10_0011	2016_08_11_0004	2016_08_11_0009	2016_08_11_0014	2016_08_11_0019	2016_08_11_0025	2016_08_11_0031	2016_09_14_0005	2016_09_14_0010	2016_09_14_0015	2016_09_14_0032	2016_09_14_0037	2016_09_14_0042	2016_09_14_0047	2016_10_20_0013	2016_10_20_0014	2016_10_20_0002	2016_10_20_0014	2020_10_21_0001	2020_10_21_0005	2020_10_21_0007	2020_10_21_0010	2020_10_21_0012	2020_10_21_0014	2020_10_21_0016	2020_10_21_0018	2020_10_21_0020	2020_10_21_0021	2020_10_21_0023	2020_10_23_0023	2020_11_02_0004	2020_11_02_0007
0	1	1	1	1	1	1	1	1	1	1	1	1	1	1	1	1	1	1	1	1	1	1	1	1	1	1	1	1	1	1	1	1
0.1
1															1.24809	1.25316	0.908413	1.05778	1.0504			1.36941
3
10														0.989908						1.18562			1.23383		0.864692				2.00887		0.843064	1.01446
30
100	0.964864									0.918736			1.00682															0.153366
300				0.998214					1.08707			1.02506																		1.30197
1000			0.856409			0.138056		0.382864			0.796937																0.004581
3000		0.077525			0.055256		0.023937														0.001156			0.007471		0.007132
[truncated: 14 more columns]

## Sheet: Results
Row statistics WT inhibition
PcTx1 (nM)	WT inhibition normalized
0	1	0	63
0.1	0.818844	0.396185	10
1	0.40773	0.323735	14
3	0.180713	0.251517	9
10	0.0650488	0.145252	11
30	0.0235085	0.0496883	10
100	0.0108036	0.0111307	9
Row statistics F350L inhibition
PcTx1 (nM)	F350L inhibition normalize
0	1	0	33
1	1.14787	0.17039	6
10	1.16292	0.400915	7
100	0.760946	0.406647	4
300	1.10308	0.137714	4
1000	0.435769	0.38234	5
3000	0.0287462	0.0309396	6
PcTx1 inhibition
	WT	F350L
[Inhibitor] vs. response -- Variable slope (four parameters)
Best-fit values
Bottom	= 0,000	= 0,000
Top	= 1,000	= 1,000
IC50	0.6118	980.1
HillSlope	-0.892	-12.83
logIC50	-0.2134	2.991
Span	= 1,000	= 1,000
95% CI (profile likelihood)
IC50	0,4157 to 0,8619	???
HillSlope	-1,228 to -0,6768	???
logIC50	-0,3812 to -0,06456	???
Goodness of Fit
Degrees of Freedom	124	59
R squared	0.8626	0.7573
Sum of Squares	3.525	2.12
Sy.x	0.1686	0.1896
Constraints
Bottom	Bottom = 0	Bottom = 0
Top	Top = 1	Top = 1
IC50	IC50 > 0	IC50 > 0
Number of points
# of X values	126	65
# Y values analyzed	126	61
