# Supplementary material for: Conformational decoupling in acid-sensing ion channels uncovers mechanism and stoichiometry of PcTx1-mediated inhibition
Source: eLife. 2022 Feb 14;11:e73384. doi: 10.7554/eLife.73384 (PMC8871370; doi:10.7554/eLife.73384)
Supplement: Figure 4—source data 2. [file elife-73384-fig4-data2.xlsx]

## Sheet: Data
wt mASIC1a
pH	2017_07_13_0000		2017_07_13_0002		2017_07_13_0004		2017_08_09_0004		2017_08_09_0007		2017_08_09_0009		2020_06_26_0000		2020_06_26_0007		2020_29_07_0000		2020_08_13_0003		2020_09_02_0000
7.8
7.6	17.186		20.57		22.873		10.384		14.439		9.477		15.852		7.767		4.124		7.501		6.198
7.4	17.791	16.475	22.596	23.295	21.757	21.046	11.181	9.379	15.322	13.711	9.564	8.305	15.176	13.288	4.943	4.379	4.205	3.686	8.736	9.383	5.167	4.428
7.3	12.369		21.153		19.037		10.219		12.19				11.879		3.94		1.556		7.698		3.68
7.2	1.081		4.367		3.932		1.241		0.833		0.332		1.44		0.282		0.04		4.091		0.283
7.1	0.018		0.236		0.254		0.227		0.117				0.034		0.008		0.018		0.48		0.028
7													0.008		0.009		0.015		0.026		0.02
6.9	0.009		0.016		0.021		0.013		0.008		0.003								0.022
6.7			0.011
6.5
6.3
WT_WT_WT
pH	2017_07_21_0000		2017_07_21_0004		2017_07_26_0002		2017_07_26_0008		2017_08_09_0003
7.6	9.572		13.02		12.246		22.555		14.177
7.4	9.472	10.296	13.486	11.601	12.568	11.917	19.835	20.77	14.812	11.857
7.3	8.496		11.191		10.471		18.096		12.518
7.2	2.423		3.97		4.184		3.171		3.009
7.1	0.49		0.537		0.309		0.131		0.782
6.9	0.009		0.009		0.015		0.008		0.007
6.7
6.5
6.3
WT_FL_WT
pH	2017_07_21_0001		2017_07_21_0005		2017_07_26_0003		2017_07_26_0009		2017_08_08_0001
7.6	1.579		10.372		10.596		10.059		3.71
7.4	1.55	1.287	11.139	10.632	11.559	9.507	9.892	9.868	6.182	5.809
7.3	1.389		8.936		10.396		9.023		2.57
7.2	0.362		4.693		3.528		3.098		0.687
7.1	0.068		1.147		0.173		0.153		0.022
6.9	0.045		0.012		0.005		-0.006		0.005
6.7
6.5
WT_FL_FL
pH	2017_07_21_0002		2017_07_21_0006		2017_07_26_0004		2017_07_26_0010		2017_08_03_0003		2017_08_09_0002
7.6	10.264		7.426		7.415		6.692		6.332		12.179
7.4	9.599	10.324	6.516	7.528	6.824	6.446	9.273	9.663	5.763	5.731	12.551	12.571
7.3	9.764		7.444		6.957		7.085		5.471		8.609
7.2	6.983		5.844		3.502		5.032		4.665		9.157
7.1	2.731		2.774		0.222		0.313		0.429		4.207
6.9	0.033		0.021		0.009		0.015		0.007		0.009
6.7
6.5
6.3
FL_FL_FL
pH	2017_07_26_0011		2020_06_26_0003		2020_06_26_0008		2020_29_07_0007
7.6	4.65		3.855		2.838		4.166
7.4	3.987	4.898	3.615	3.57	3.522	4.017	4.744	4.201
7.3	4.773		3.755		2.584		4.299
7.2	4.217		3.617		2.64		2.259
7.1	0.723		1.212		1.356		0.226
7			0.076		0.144		0.013
6.9	0.008		0.015		0.003		0.007
6.7
F350L																								Row stats														Normalized
pH	2017_07_13_0001		2017_07_13_0003		2017_07_13_0005		2020_06_26_0002		2020_29_07_0005		2020_09_02_0002		2020_09_02_0005												2017_07_13_0001	2017_07_13_0003	2017_07_13_0005	2020_06_26_0002	2020_29_07_0005	2020_09_02_0002	2020_09_02_0005								2017_07_13_0001	2017_07_13_0003	2017_07_13_0005	2020_06_26_0002	2020_29_07_0005	2020_09_02_0002	2020_09_02_0005
7.8																								7.6	18.371	22.077	20.704	13.926	18.447	20.191	9.793							7.6	0.876876	1	0.980953	0.997636	0.896225	0.994533	0.890232
7.6	18.371		22.077		20.704		13.926		18.447		20.191		9.793											7.4	20.9505	21.253	20.9475	13.435	19.5705	18.4675	11.0005							7.4	1	0.962676	0.99249	0.962461	0.950809	0.909639	1
7.4	19.01	22.891	22.107	20.399	21.281	20.614	12.752	14.118	21.097	18.044	17.269	19.666	10.084	11.917										7.3	20.424	21.987	21.106	13.959	20.583	20.302	8.258							7.3	0.974869	0.995923	1	1	1	1	0.750693
7.3	20.424		21.987		21.106		13.959		20.583		20.302		8.258											7.2		20.008	19.574	13.904	16.749	19.411	9.091							7.2		0.906283	0.927414	0.99606	0.81373	0.956113	0.826417
7.2			20.008		19.574		13.904		16.749		19.411		9.091											7.1	10.049	7.769	12.161	7.151	1.952	12.052	5.116							7.1	0.479654	0.351905	0.576187	0.512286	0.0948355	0.593636	0.46507
7.1	10.049		7.769		12.161		7.151		1.952		12.052		5.116											7				0.599	0.064	0.528	0.314							7				0.0429114	0.00310936	0.0260073	0.0285442
7							0.599		0.064		0.528		0.314											6.9	0.032	0.019	0.053	0.033	0.011	0.045	0.02							6.9	0.00152741	0.000860624	0.00251113	0.00236407	0.000534422	0.00221653	0.0018181
6.9	0.032		0.019		0.053		0.033		0.011		0.045		0.02											6.8														6.8
6.8																								6.7	0.006	0.012	0.015			1								6.7	0.000286389	0.000543552	0.000710698
6.7	0.006		0.012		0.015
6.5
6.3

## Sheet: Row stats, norm
Row stats														Normalized													pH	Normalize of Row statistics of wt
pH	2017_07_13_0000	2017_07_13_0002	2017_07_13_0004	2017_08_09_0004	2017_08_09_0007	2017_08_09_0009	2020_06_26_0000	2020_06_26_0007	2020_29_07_0000	2020_08_13_0003	2020_09_02_0000				2017_07_13_0000	2017_07_13_0002	2017_07_13_0004	2017_08_09_0004	2017_08_09_0007	2017_08_09_0009	2020_06_26_0000	2020_06_26_0007	2020_29_07_0000	2020_08_13_0003	2020_09_02_0000		7.8
														7.6	1	0.896472	1	1	0.994661	1	1	1	1	0.827971	1		7.6	0.974464	0.0575914	11
7.6	17.186	20.57	22.873	10.384	14.439	9.477	15.852	7.767	4.124	7.501	6.198			7.4	0.996916	1	0.935667	0.989985	1	0.942756	0.897805	0.600103	0.956717	1	0.77404		7.4	0.917635	0.124978	11
7.4	17.133	22.9455	21.4015	10.28	14.5165	8.9345	14.232	4.661	3.9455	9.0595	4.7975			7.3	0.719714	0.92188	0.832291	0.98411	0.839734		0.749369	0.507274	0.377304	0.849716	0.59374		7.3	0.737513	0.191692	10
7.3	12.369	21.153	19.037	10.219	12.19		11.879	3.94	1.556	7.698	3.68			7.2	0.0629	0.190321	0.171906	0.119511	0.057383	0.0350322	0.0908403	0.0363075	0.00969932	0.45157	0.0456599		7.2	0.115557	0.125423	11
7.2	1.081	4.367	3.932	1.241	0.833	0.332	1.44	0.282	0.04	4.091	0.283			7.1	0.00104736	0.0102852	0.0111048	0.0218606	0.00805979		0.00214484	0.00103	0.00436469	0.0529831	0.00451759		7.1	0.0117398	0.0158013	10
7.1	0.018	0.236	0.254	0.227	0.117		0.034	0.008	0.018	0.48	0.028			7							0.000504668	0.00115875	0.00363725	0.00286992	0.00322685		7	0.00227949	0.00136891	5
7							0.008	0.009	0.015	0.026	0.02			6.9	0.000523682	0.000697304	0.000918113	0.00125193	0.000551097	0.000316556				0.00242839			6.9	0.000955296	0.000716891	7
6.9	0.009	0.016	0.021	0.013	0.008	0.003				0.022				6.7		0.000479397											6.7	0.000479397	0	1
6.7		0.011
Row stats														Normalized													pH	Normalize of Row statistics of wt,wt,wt
pH	2017_07_21_0000	2017_07_21_0004	2017_07_26_0002	2017_07_26_0008	2017_08_09_0003									pH	2017_07_21_0000	2017_07_21_0004	2017_07_26_0002	2017_07_26_0008	2017_08_09_0003								7.6	0.993687	0.0141168	5
7.6	9.572	13.02	12.246	22.555	14.177									7.6	0.968434	1	1	1	1								7.4	0.960764	0.042271	5
7.4	9.884	12.5435	12.2425	20.3025	13.3345									7.4	1	0.963402	0.999714	0.900133	0.940573								7.3	0.851887	0.0298013	5
7.3	8.496	11.191	10.471	18.096	12.518									7.3	0.859571	0.859524	0.855055	0.802305	0.882979								7.2	0.248911	0.07879	5
7.2	2.423	3.97	4.184	3.171	3.009									7.2	0.245144	0.304916	0.341663	0.14059	0.212245								7.1	0.035404	0.0200287	5
7.1	0.49	0.537	0.309	0.131	0.782									7.1	0.0495751	0.0412442	0.0252327	0.00580802	0.0551598								6.9	0.000735029	0.000344806	5
6.9	0.009	0.009	0.015	0.008	0.007									6.9	0.000910563	0.000691244	0.00122489	0.000354689	0.000493757
Row stats														Normalized													pH	Normalize of Row statistics of wt,F350L,wt
pH	2017_07_21_0001	2017_07_21_0005	2017_07_26_0003	2017_07_26_0009	2017_08_08_0001									pH	2017_07_21_0001	2017_07_21_0005	2017_07_26_0003	2017_07_26_0009	2017_08_08_0001								7.6	0.914325	0.166463	5
7.6	1.579	10.372	10.596	10.059	3.71									7.6	1	0.952827	1	1	0.618797								7.4	0.974923	0.0434156	5
7.4	1.4185	10.8855	10.533	9.88	5.9955									7.4	0.898353	1	0.994054	0.982205	1								7.3	0.801473	0.216153	5
7.3	1.389	8.936	10.396	9.023	2.57									7.3	0.879671	0.820909	0.981125	0.897008	0.428655								7.2	0.283182	0.11865	5
7.2	0.362	4.693	3.528	3.098	0.687									7.2	0.229259	0.431124	0.332956	0.307983	0.114586								7.1	0.0367283	0.0409997	5
7.1	0.068	1.147	0.173	0.153	0.022									7.1	0.0430652	0.10537	0.0163269	0.0152103	0.00366942								6.9	0.00606216	0.0125592	5
6.9	0.045	0.012	0.005	-0.006	0.005									6.9	0.0284991	0.00110238	0.000471876	-0.000596481	0.000833959
Row stats														Normalized													pH	Normalize of Row statistics of wt,F350L,F350L
pH	2017_07_21_0002	2017_07_21_0006	2017_07_26_0004	2017_07_26_0010	2017_08_03_0003	2017_08_09_0002								pH	2017_07_21_0002	2017_07_21_0006	2017_07_26_0004	2017_07_26_0010	2017_08_03_0003	2017_08_09_0002							7.6	0.945662	0.117627	6
7.6	10.264	7.426	7.415	6.692	6.332	12.179								7.6	1	0.997582	1	0.706802	1	0.969588							7.4	0.95271	0.0453101	6
7.4	9.9615	7.022	6.635	9.468	5.747	12.561								7.4	0.970528	0.94331	0.894808	1	0.907612	1							7.3	0.864538	0.124028	6
7.3	9.764	7.444	6.957	7.085	5.471	8.609								7.3	0.951286	1	0.938233	0.74831	0.864024	0.685375							7.2	0.655816	0.125183	6
7.2	6.983	5.844	3.502	5.032	4.665	9.157								7.2	0.680339	0.785062	0.472286	0.531474	0.736734	0.729002							7.1	0.184067	0.158199	6
7.1	2.731	2.774	0.222	0.313	0.429	4.207								7.1	0.266076	0.372649	0.0299393	0.0330587	0.0677511	0.334926							6.9	0.00177604	0.00100878	6
6.9	0.033	0.021	0.009	0.015	0.007	0.009								6.9	0.00321512	0.00282106	0.00121376	0.00158428	0.0011055	0.000716503
Row stats														Normalized													pH	Normalize of Row statistics of F350L,F350L,F350L
pH	2017_07_26_0011	2020_06_26_0003	2020_06_26_0008	2020_29_07_0007										pH	2017_07_26_0011	2020_06_26_0003	2020_06_26_0008	2020_29_07_0007									7.6	0.914646	0.111483	4
7.6	4.65	3.855	2.838	4.166										7.6	0.97423	1	0.752885	0.93147									7.4	0.965666	0.0396486	4
7.4	4.4425	3.5925	3.7695	4.4725										7.4	0.930756	0.931907	1	1									7.3	0.905192	0.147346	4
7.3	4.773	3.755	2.584	4.299										7.3	1	0.97406	0.685502	0.961207									7.2	0.756805	0.196239	4
7.2	4.217	3.617	2.64	2.259										7.2	0.883511	0.938262	0.700358	0.505087									7.1	0.219034	0.143581	4
7.1	0.723	1.212	1.356	0.226										7.1	0.151477	0.314397	0.359729	0.050531									7	0.0202742	0.017654	3
7		0.076	0.144	0.013										7		0.0197147	0.0382014	0.00290665									6.9	0.00198203	0.00133151	4
6.9	0.008	0.015	0.003	0.007										6.9	0.00167609	0.00389105	0.000795862	0.00156512

## Sheet: Fits
Row stats									Collected EC50							Collected hill
	WT	F350L	WT/WT/WT	WT/F350L/WT	WT/F350L/F350L	F350L/F350L/F350L			WT	F350L	WT/WT/WT	WT/F350L/WT	WT/FL/FL	FL/FL/FL		WT	F350L	WT/WT/WT	WT/FL/WT	WT/FL/FL	FL/FL/FL
log(inhibitor) vs. response -- Variable slope (four parameters)									7.274	7.104	7.238	7.24	7.157	7.146		16.02	9.225	12.56	12.34	7.896	16.27
Best-fit values									7.237	7.121	7.232	7.215	7.128	7.123		16.99	12.47	10.95	8.355	8.144	14.93
Bottom	= 0,000	= 0,000	= 0,000	= 0,000	= 0,000	= 0,000			7.25	7.087	7.227	7.215	7.205	7.161		13.09	10.1	11	19.5	11.66	5.275
Top	= 1,000	= 1,000	= 1,000	= 1,000	= 1,000	= 1,000			7.233	7.098	7.258	7.227	7.21	7.199		26.45	15.99	12.51	12.87	7.854	13.31
LogIC50	7.267	7.11	7.239	7.24	7.173	7.153			7.263	7.16	7.24	7.306	7.171			19.35	16.2	13.55	15.9	13.94
HillSlope	12.56	10.47	12.05	10.07	7.815	8.906			7.308	7.09			7.153			13.28	15.52			5.058
IC50	18472301	12881734	17334039	17378376	14897190	14219440			7.268	7.122						12.61	7.042
Span	= 1,000	= 1,000	= 1,000	= 1,000	= 1,000	= 1,000			7.349							5.296
95% CI (profile likelihood)									7.314							15.76
LogIC50	7,254 to 7,278	7,097 to 7,122	7,232 to 7,246	7,221 to 7,260	7,150 to 7,196	7,127 to 7,178			7.212							9.58
HillSlope	9,494 to 17,57	7,371 to 17,57	10,35 to 14,11	7,038 to 14,88	5,238 to 12,37	5,300 to 14,73			7.305							7.177
IC50	17958204 to 18977302	12492466 to 13254669	17050294 to 17626685	16621915 to 18186748	14136397 to 15705903	13404856 to 15073867
Goodness of Fit
Degrees of Freedom	5	5	4	4	4	4
R squared	0.9962	0.9962	0.999	0.9926	0.9907	0.9868
Sum of Squares	0.004782	0.004592	0.001104	0.007334	0.007857	0.01087
Sy.x	0.03092	0.0303	0.01662	0.04282	0.04432	0.05214
Constraints
Bottom	Bottom = 0	Bottom = 0	Bottom = 0	Bottom = 0	Bottom = 0	Bottom = 0
Top	Top = 1	Top = 1	Top = 1	Top = 1	Top = 1	Top = 1
Number of points
# of X values	10	10	8	8	8	8
# Y values analyzed	7	7	6	6	6	6
WT
	2017_07_13_0000	2017_07_13_0002	2017_07_13_0004	2017_08_09_0004	2017_08_09_0007	2017_08_09_0009	2020_06_26_0000	2020_06_26_0007	2020_29_07_0000	2020_08_13_0003	2020_09_02_0000				pH50	Hill Coefficient
log(inhibitor) vs. response -- Variable slope (four parameters)														2017_07_13_0000	7.274	16.02
Best-fit values														2017_07_13_0002	7.237	16.99
Bottom	= 0,000	= 0,000	= 0,000	= 0,000	= 0,000	= 0,000	= 0,000	= 0,000	= 0,000	= 0,000	= 0,000			2017_07_13_0004	7.25	13.09
Top	= 1,000	= 1,000	= 1,000	= 1,000	= 1,000	= 1,000	= 1,000	= 1,000	= 1,000	= 1,000	= 1,000			2017_08_09_0004	7.233	26.45
LogIC50	7.274	7.237	7.25	7.233	7.263	7.308	7.268	7.349	7.314	7.212	7.305			2017_08_09_0007	7.263	19.35
HillSlope	16.02	16.99	13.09	26.45	19.35	13.28	12.61	5.296	15.76	9.58	7.177			2017_08_09_0009	7.308	13.28
IC50	18804676	17257154	17798166	17091155	18315174	20342674	18538985	22354701	20601681	16289873	20205267			2020_06_26_0000	7.268	12.61
Span	= 1,000	= 1,000	= 1,000	= 1,000	= 1,000	= 1,000	= 1,000	= 1,000	= 1,000	= 1,000	= 1,000			2020_06_26_0007	7.349	5.296
95% CI (profile likelihood)														2020_29_07_0000	7.314	15.76
LogIC50	7,264 to ???	??? to 7,254	7,236 to 7,265	???	7,247 to ???	???	7,242 to 7,293	7,299 to 7,402	7,303 to 7,327	7,182 to 7,243	7,266 to 7,344			2020_08_13_0003	7.212	9.58
HillSlope	12,50 to ???	11,87 to ???	9,621 to 18,00	13,99 to ???	13,92 to ???	7,508 to ???	6,989 to ???	3,088 to 9,266	10,88 to ???	5,822 to ???	4,305 to 14,55			2020_09_02_0000	7.305	7.177
IC50	18378862 to ???	??? to 17959520	17215501 to 18392532	???	17652966 to ???	???	17462206 to 19624340	19927336 to 25218385	20074734 to 21233843	15198258 to 17510454	18440287 to 22097463
Goodness of Fit
Degrees of Freedom	5	6	5	5	5	3	5	5	5	6	5
R squared	0.9979	0.9933	0.9951	0.9899	0.9959	0.9918	0.9828	0.9493	0.9944	0.976	0.9658
Sum of Squares	0.003023	0.01122	0.006495	0.01572	0.006251	0.008824	0.02226	0.04584	0.007988	0.03414	0.03769
Sy.x	0.02459	0.04324	0.03604	0.05608	0.03536	0.05424	0.06673	0.09575	0.03997	0.07544	0.08682
Constraints
Bottom	Bottom = 0	Bottom = 0	Bottom = 0	Bottom = 0	Bottom = 0	Bottom = 0	Bottom = 0	Bottom = 0	Bottom = 0	Bottom = 0	Bottom = 0
Top	Top = 1	Top = 1	Top = 1	Top = 1	Top = 1	Top = 1	Top = 1	Top = 1	Top = 1	Top = 1	Top = 1
Number of points
# of X values	9	10	9	9	9	9	8	8	8	9	8
# Y values analyzed	7	8	7	7	7	5	7	7	7	8	7
WT_WT_WT
	2017_07_21_0000	2017_07_21_0004	2017_07_26_0002	2017_07_26_0008	2017_08_09_0003			pH50	Hill Coefficient
log(inhibitor) vs. response -- Variable slope (four parameters)							2017_07_21_0000	7.238	12.56
Best-fit values							2017_07_21_0004	7.232	10.95
Bottom	= 0,000	= 0,000	= 0,000	= 0,000	= 0,000		2017_07_26_0002	7.227	11
Top	= 1,000	= 1,000	= 1,000	= 1,000	= 1,000		2017_07_26_0008	7.258	12.51
LogIC50	7.238	7.232	7.227	7.258	7.24		2017_08_09_0003	7.24	13.55
HillSlope	12.56	10.95	11	12.51	13.55
IC50	17295226	17051710	16862068	18097828	17382904
Span	= 1,000	= 1,000	= 1,000	= 1,000	= 1,000
95% CI (profile likelihood)
LogIC50	7,225 to 7,251	7,213 to 7,252	7,219 to 7,235	7,235 to 7,279	??? to 7,271
HillSlope	9,575 to 17,25	7,439 to 19,16	9,386 to 13,17	7,515 to 25,83	6,870 to ???
IC50	16781872 to 17842290	16322519 to 17854169	16555701 to 17183084	17180224 to 19020331	??? to 18642421
Goodness of Fit
Degrees of Freedom	5	5	5	5	5
R squared	0.9957	0.9907	0.9985	0.9874	0.9773
Sum of Squares	0.005653	0.01168	0.002001	0.01613	0.02947
Sy.x	0.03363	0.04833	0.02001	0.0568	0.07678
Constraints
Bottom	Bottom = 0	Bottom = 0	Bottom = 0	Bottom = 0	Bottom = 0
Top	Top = 1	Top = 1	Top = 1	Top = 1	Top = 1
Number of points
# of X values	7	7	7	7	7
# Y values analyzed	7	7	7	7	7
WT_FL_WT
	2017_07_21_0001	2017_07_21_0005	2017_07_26_0003	2017_07_26_0009	2017_08_08_0001
log(inhibitor) vs. response -- Variable slope (four parameters)								pH50	Hill Coefficient
Best-fit values							2017_07_21_0001	7.24	12.34
Bottom	= 0,000	= 0,000	= 0,000	= 0,000	= 0,000		2017_07_21_0005	7.215	8.355
Top	= 1,000	= 1,000	= 1,000	= 1,000	= 1,000		2017_07_26_0003	7.215	19.5
LogIC50	7.24	7.215	7.215	7.227	7.306		2017_07_26_0009	7.227	12.87
HillSlope	12.34	8.355	19.5	12.87	15.9		2017_08_08_0001	7.306	15.9
IC50	17367553	16393443	16421731	16882889	20237853
Span	= 1,000	= 1,000	= 1,000	= 1,000	= 1,000
95% CI (profile likelihood)
LogIC50	??? to 7,273	7,200 to 7,229	??? to 7,240	7,224 to 7,231	7,224 to ???
HillSlope	5,838 to ???	6,693 to 10,83	9,293 to ???	11,92 to 13,99	3,279 to ???
IC50	??? to 18733299	15854189 to 16948480	??? to 17378754	16759614 to 17008885	16741438 to ???
Goodness of Fit
Degrees of Freedom	5	5	5	5	5
R squared	0.9723	0.9955	0.9865	0.9997	0.8622
Sum of Squares	0.03321	0.005091	0.01894	0.0003364	0.1584
Sy.x	0.0815	0.03191	0.06155	0.008202	0.178
Constraints
Bottom	Bottom = 0	Bottom = 0	Bottom = 0	Bottom = 0	Bottom = 0
Top	Top = 1	Top = 1	Top = 1	Top = 1	Top = 1
Number of points
# of X values	7	7	7	7	7
# Y values analyzed	7	7	7	7	7
WT_FL_FL
	2017_07_21_0002	2017_07_21_0006	2017_07_26_0004	2017_07_26_0010	2017_08_03_0003	2017_08_09_0002
log(inhibitor) vs. response -- Variable slope (four parameters)									pH50	Hill Coefficient
Best-fit values								2017_07_21_0002	7.157	7.896
Bottom	= 0,000	= 0,000	= 0,000	= 0,000	= 0,000	= 0,000		2017_07_21_0006	7.128	8.144
Top	= 1,000	= 1,000	= 1,000	= 1,000	= 1,000	= 1,000		2017_07_26_0004	7.205	11.66
LogIC50	7.157	7.128	7.205	7.21	7.171	7.153		2017_07_26_0010	7.21	7.854
HillSlope	7.896	8.144	11.66	7.854	13.94	5.058		2017_08_03_0003	7.171	13.94
IC50	14346070	13439813	16038226	16232408	14828055	14209983		2017_08_09_0002	7.153	5.058
Span	= 1,000	= 1,000	= 1,000	= 1,000	= 1,000	= 1,000
95% CI (profile likelihood)
LogIC50	7,144 to 7,169	7,098 to 7,155	7,180 to 7,233	7,138 to 7,283	7,140 to 7,196	7,088 to 7,209
HillSlope	6,385 to 9,812	4,998 to 14,02	6,089 to ???	2,919 to ???	5,466 to ???	2,898 to 11,08
IC50	13921108 to 14773898	12532228 to 14296206	15148547 to 17104285	13741911 to 19174751	13799114 to 15721491	12233783 to 16196749
Goodness of Fit
Degrees of Freedom	5	5	5	5	5	5
R squared	0.9963	0.9823	0.9808	0.8942	0.9697	0.9492
Sum of Squares	0.003614	0.01603	0.0221	0.1094	0.03233	0.04424
Sy.x	0.02688	0.05663	0.06648	0.1479	0.08042	0.09406
Constraints
Bottom	Bottom = 0	Bottom = 0	Bottom = 0	Bottom = 0	Bottom = 0	Bottom = 0
Top	Top = 1	Top = 1	Top = 1	Top = 1	Top = 1	Top = 1
Number of points
# of X values	7	7	7	7	7	7
# Y values analyzed	7	7	7	7	7	7
FL_FL_FL
	2017_07_26_0011	2020_06_26_0003	2020_06_26_0008	2020_29_07_0007
log(inhibitor) vs. response -- Variable slope (four parameters)									pH50	Hill Coefficient
Best-fit values								2017_07_26_0011	7.146	16.27
Bottom	= 0,000	= 0,000	= 0,000	= 0,000				2020_06_26_0003	7.123	14.93
Top	= 1,000	= 1,000	= 1,000	= 1,000				2020_06_26_0008	7.161	5.275
LogIC50	7.146	7.123	7.161	7.199				2020_29_07_0007	7.199	13.31
HillSlope	16.27	14.93	5.275	13.31
IC50	13994652	13259919	14483344	15816862
Span	= 1,000	= 1,000	= 1,000	= 1,000
95% CI (profile likelihood)
LogIC50	???	??? to 7,138	7,086 to 7,239	7,184 to 7,214
HillSlope	8,631 to ???	10,04 to ???	2,553 to 15,78	8,661 to ???
IC50	???	??? to 13733953	12194940 to 17329184	15275303 to 16362741
Goodness of Fit
Degrees of Freedom	5	6	6	6
R squared	0.9744	0.9929	0.8946	0.9923
Sum of Squares	0.02846	0.009935	0.1152	0.01212
Sy.x	0.07545	0.04069	0.1386	0.04495
Constraints
Bottom	Bottom = 0	Bottom = 0	Bottom = 0	Bottom = 0
Top	Top = 1	Top = 1	Top = 1	Top = 1
Number of points
# of X values	8	8	8	8
# Y values analyzed	7	8	8	8
FL
	2017_07_13_0001	2017_07_13_0003	2017_07_13_0005	2020_06_26_0002	2020_29_07_0005	2020_09_02_0002	2020_09_02_0005				pH50	Hill Coefficient
log(inhibitor) vs. response -- Variable slope (four parameters)										2017_07_13_0001	7.104	9.225
Best-fit values										2017_07_13_0003	7.121	12.47
Bottom	= 0,000	= 0,000	= 0,000	= 0,000	= 0,000	= 0,000	= 0,000			2017_07_13_0005	7.087	10.1
Top	= 1,000	= 1,000	= 1,000	= 1,000	= 1,000	= 1,000	= 1,000			2020_06_26_0002	7.098	15.99
LogIC50	7.104	7.121	7.087	7.098	7.16	7.09	7.122			2020_29_07_0005	7.16	16.2
HillSlope	9.225	12.47	10.1	15.99	16.2	15.52	7.042			2020_09_02_0002	7.09	15.52
IC50	12707284	13220222	12220695	12539802	14469813	12298306	13230815			2020_09_02_0005	7.122	7.042
Span	= 1,000	= 1,000	= 1,000	= 1,000	= 1,000	= 1,000	= 1,000
95% CI (profile likelihood)
LogIC50	7,053 to 7,160	7,111 to 7,133	7,080 to 7,093	7,087 to 7,109	7,134 to ???	7,068 to 7,109	7,069 to 7,183
HillSlope	3,819 to ???	9,187 to 19,96	8,413 to 12,92	10,13 to ???	9,538 to ???	8,054 to ???	3,423 to ???
IC50	11287676 to 14443970	12899366 to 13577161	12012654 to 12397744	12209037 to 12841982	13600505 to ???	11693096 to 12844569	11718033 to 15252700
Goodness of Fit
Degrees of Freedom	5	6	6	6	6	6	6
R squared	0.9747	0.996	0.9992	0.9939	0.9825	0.9812	0.9337
Sum of Squares	0.03255	0.005734	0.001138	0.008274	0.02661	0.02412	0.07894
Sy.x	0.08068	0.03091	0.01377	0.03713	0.0666	0.0634	0.1147
Constraints
Bottom	Bottom = 0	Bottom = 0	Bottom = 0	Bottom = 0	Bottom = 0	Bottom = 0	Bottom = 0
Top	Top = 1	Top = 1	Top = 1	Top = 1	Top = 1	Top = 1	Top = 1
Number of points
# of X values	11	11	11	9	9	9	9
# Y values analyzed	7	8	8	8	8	8	8
