# Supplementary material for: Conformational decoupling in acid-sensing ion channels uncovers mechanism and stoichiometry of PcTx1-mediated inhibition
Source: eLife. 2022 Feb 14;11:e73384. doi: 10.7554/eLife.73384 (PMC8871370; doi:10.7554/eLife.73384)
Supplement: Figure 4—source data 3. [file elife-73384-fig4-data3.xlsx]

## Sheet: Data
WT_WT_WT
PcTx1 (nM)	2016_07_15_0001	2016_07_15_0003	2016_07_15_0005	2016_07_15_0007	2016_07_15_0009	2016_07_15_0011	2016_07_15_0015	2016_07_15_0017	2016_07_15_0020	2016_08_03_0001	2016_08_03_0006	2016_08_03_0012	2016_08_03_0017	2016_08_03_0021	2016_08_03_0026	2016_08_05_0009	2016_08_05_0013	2016_08_05_0024	2016_08_05_0029	2016_08_05_0034	2016_08_05_0040	2016_08_05_0045	2016_08_05_0050	2016_08_05_0055	2016_08_05_0060	2016_09_16_0000	2016_09_16_0004	2016_09_16_0008	2016_09_16_0012	2016_09_16_0016	2016_09_16_0020	2016_09_16_0024	2016_09_16_0027	2016_09_16_0030	2016_09_16_0034	2016_09_16_0037	2016_09_16_0040	2016_09_16_0044	2016_09_16_0046	2016_09_16_0049	2016_09_16_0052	2016_09_16_0055	2016_09_16_0057	2020_11_02_0001	2020_11_02_0009
0	4.323	21.987	22.479	18.187	17.721	25.742	23.272	24.562	11.18	17.736	11.126	9.609	15.426	25.133	24.977	5.143	12.9	13.509	12.778	11.926	14.442	12.167	15.382	16.974	14.002	6.585	5.646	9.814	11.224	9.753	3.935	6.053	7.351	7.832	7.532	6.81	7.017	9.379	8.157	7.174	7.686	6.931	8.203	8.171	5.894
0.1	4.042																			11.295						6.654						5.11						9.323						7.679
1		20.044														4.853					12.725						3.68						6.652						7.805	5.503					4.894
3			15.96				19.484					7.682			18.563		5.104					11.364						2.497						6.976
10				14.309				6.335															7.875						0.163						4.237						3.885
30					0.213				4.923	0.812			7.251					0.44						2.63						0.111						0.169						0.096
100						1.386					0.12			0.388					0.145						0.113						0.072						0.071						0.208
1000
3000
Normalized
PcTx1 (nM)	2016_07_15_0001	2016_07_15_0003	2016_07_15_0005	2016_07_15_0007	2016_07_15_0009	2016_07_15_0011	2016_07_15_0015	2016_07_15_0017	2016_07_15_0020	2016_08_03_0001	2016_08_03_0006	2016_08_03_0012	2016_08_03_0017	2016_08_03_0021	2016_08_03_0026	2016_08_05_0009	2016_08_05_0013	2016_08_05_0024	2016_08_05_0029	2016_08_05_0034	2016_08_05_0040	2016_08_05_0045	2016_08_05_0050	2016_08_05_0055	2016_08_05_0060	2016_09_16_0000	2016_09_16_0004	2016_09_16_0008	2016_09_16_0012	2016_09_16_0016	2016_09_16_0020	2016_09_16_0024	2016_09_16_0027	2016_09_16_0030	2016_09_16_0034	2016_09_16_0037	2016_09_16_0040	2016_09_16_0044	2016_09_16_0046	2016_09_16_0049	2016_09_16_0052	2016_09_16_0055	2016_09_16_0057	2020_11_02_0001	2020_11_02_0009
0	1	1	1	1	1	1	1	1	1	1	1	1	1	1	1	1	1	1	1	1	1	1	1	1	1	1	1	1	1	1	1	1	1	1	1	1	1	1	1	1	1	1	1	1	1
0.1	0.934999																			0.94709						1.01048						0.844209						0.994029						0.939787
1		0.91163														0.943613					0.881111						0.651789						0.904911						0.956847	0.767076					0.830336
3			0.709996				0.837229					0.799459			0.743204		0.395659					0.934002						0.254432						0.890705
10				0.786771				0.257919															0.511962						0.014522						0.562533						0.505464
30					0.01202				0.44034	0.045783			0.470051					0.032571						0.154943						0.011381						0.024816						0.013851
100						0.053842					0.010786			0.015438					0.011348						0.00807						0.018297						0.010118						0.025357
1000
3000
FL_WT_WT
PcTx1 (nM)	2016_07_13_0033	2016_07_13_0037	2016_07_13_0041	2016_08_03_0002	2016_08_03_0007	2016_08_03_0013	2016_08_03_0018	2016_08_03_0023	2016_08_05_0010	2016_08_05_0014	2016_08_05_0019	2016_08_05_0025	2016_08_05_0030	2016_08_05_0035	2016_08_05_0041	2016_08_05_0046	2016_08_05_0051	2016_08_05_0056	2016_08_05_0061	2016_09_16_0001	2016_09_16_0005	2016_09_16_0009	2016_09_16_0013	2016_09_16_0017	2016_09_16_0021	2016_09_16_0033	2020_10_23_0001	2020_10_23_0004	2020_10_23_0006	2020_10_23_0009	2020_10_23_0011	2020_10_23_0013	2020_10_23_0016	2020_10_23_0018	2020_10_23_0022	2020_10_23_0025
0	17.303	19.885	11.305	9.495	17.891	13.13	19.022	22.543	3.698	9.493	15.93	7.38	11.409	12.987	8.014	11.611	10.684	11.521	8.119	6.965	8.086	4.284	7.96	8.872	9.18	6.787	14.508	10.222	16.456	4.106	13.517	17.865	20.623	11.337	12.907	12.654
0.1	17.637													12.934						6.822															10.74	12.392
1		18.627							3.683						6.638						7.028						17.349					16.844
3			4.724			11.456				5.83						10.362						1.156				5.195
10											8.552						5.479						1.723					6.555					11.504	7.337
30				0.602			3.052					0.454						0.36						0.872						0.215
100					1.091			1.374					0.369						0.055						1.255						0.637
1000
3000																													0.255
Normalized
PcTx1 (nM)	2016_07_13_0033	2016_07_13_0037	2016_07_13_0041	2016_08_03_0002	2016_08_03_0007	2016_08_03_0013	2016_08_03_0018	2016_08_03_0023	2016_08_05_0010	2016_08_05_0014	2016_08_05_0019	2016_08_05_0025	2016_08_05_0030	2016_08_05_0035	2016_08_05_0041	2016_08_05_0046	2016_08_05_0051	2016_08_05_0056	2016_08_05_0061	2016_09_16_0001	2016_09_16_0005	2016_09_16_0009	2016_09_16_0013	2016_09_16_0017	2016_09_16_0021	2016_09_16_0033	2020_10_23_0001	2020_10_23_0004	2020_10_23_0006	2020_10_23_0009	2020_10_23_0011	2020_10_23_0013	2020_10_23_0016	2020_10_23_0018	2020_10_23_0022	2020_10_23_0025
0	1	1	1	1	1	1	1	1	1	1	1	1	1	1	1	1	1	1	1	1	1	1	1	1	1	1	1	1	1	1	1	1	1	1	1	1
0.1	1.0193													0.995919						0.979469															0.832107	0.979295
1		0.936736							0.995944						0.8283						0.869157						1.19582					0.942849
3			0.417868			0.872506				0.614137						0.89243						0.269841				0.765434
10											0.536849						0.512823						0.216457					0.641264					0.557824	0.647173
30				0.063402			0.160446					0.061518						0.031247						0.098287						0.052362
100					0.06098			0.06095					0.032343						0.006774						0.13671						0.047126
1000
3000																													0.015496
WT_FL_WT
PcTx1 (nM)	2016_07_13_0034	2016_07_13_0038	2016_07_13_0042	2016_08_03_0003	2016_08_03_0008	2016_08_03_0014	2016_08_03_0019	2016_08_03_0024	2016_08_05_0011	2016_08_05_0015	2016_08_05_0020	2016_08_05_0026	2016_08_05_0031	2016_08_05_0036	2016_08_05_0042	2016_08_05_0047	2016_08_05_0052	2016_08_05_0057	2016_08_05_0062	2016_09_16_0002	2016_09_16_0006	2016_09_16_0010	2016_09_16_0014	2016_09_16_0018	2016_09_16_0022	2016_09_16_0025	2016_09_16_0028	2016_09_16_0031	2016_09_16_0035	2016_09_16_0038	2016_09_16_0041	2016_09_16_0047	2016_09_16_0050	2016_09_16_0053	2020_11_02_0002	2020_11_02_0005
0	12.986	20.39	13.066	11.638	17.9	14.931	22.656	15.962	7.465	5.304	3.471	5.424	12.466	5.013	1.642	3.016	4.856	11.742	6.194	5.826	11.381	14.969	13.217	4.244	10.912	6.077	11.15	7.482	7.022	8.494	9.398	7.513	8.18	8.415	7.679	16.439
0.1	12.795													5.096						5.84						6.144									6.674
1		19.025							6.092						0.97						10.83						10.47					7.276
3			9.407			11.402				4.401						1.9						12.264						6.952					6.491
10											0.702						1.004						3.376						2.649					3.144		8.542
30				2.372			6.355					0.209						0.483						0.256						2.328
100					1.502			0.445					0.296						0.103						0.918						2.367
300
1000
3000
Normalized
PcTx1 (nM)	2016_07_13_0034	2016_07_13_0038	2016_07_13_0042	2016_08_03_0003	2016_08_03_0008	2016_08_03_0014	2016_08_03_0019	2016_08_03_0024	2016_08_05_0011	2016_08_05_0015	2016_08_05_0020	2016_08_05_0026	2016_08_05_0031	2016_08_05_0036	2016_08_05_0042	2016_08_05_0047	2016_08_05_0052	2016_08_05_0057	2016_08_05_0062	2016_09_16_0002	2016_09_16_0006	2016_09_16_0010	2016_09_16_0014	2016_09_16_0018	2016_09_16_0022	2016_09_16_0025	2016_09_16_0028	2016_09_16_0031	2016_09_16_0035	2016_09_16_0038	2016_09_16_0041	2016_09_16_0047	2016_09_16_0050	2016_09_16_0053	2020_11_02_0002	2020_11_02_0005
0	1	1	1	1	1	1	1	1	1	1	1	1	1	1	1	1	1	1	1	1	1	1	1	1	1	1	1	1	1	1	1	1	1	1	1	1
0.1	0.985292													1.01656						1.0024						1.01103									0.869124
1		0.933055							0.816075						0.590743						0.951586						0.939013					0.968455
3			0.71996			0.763646				0.829751						0.629973						0.819293						0.929163					0.793521
10											0.202247						0.206755						0.255429						0.377243					0.373619		0.519618
30				0.203815			0.2805					0.038532						0.041134						0.06032						0.274076
100					0.083911			0.027879					0.023745						0.016629						0.084128						0.251862
1000
3000
WT_WT_FL
PcTx1 (nM)	2016_07_13_0035	2016_07_13_0039	2016_07_13_0043	2016_08_03_0004	2016_08_03_0009	2016_08_03_0015	2016_08_03_0020	2016_08_03_0027	2016_08_05_0012	2016_08_05_0016	2016_08_05_0022	2016_08_05_0027	2016_08_05_0032	2016_08_05_0037	2016_08_05_0042	2016_08_05_0047	2016_08_05_0052	2016_08_05_0057	2016_08_05_0063	2016_09_16_0003	2016_09_16_0007	2016_09_16_0011	2016_09_16_0015	2016_09_16_0019	2016_09_16_0023	2016_09_16_0026	2016_09_16_0029	2016_09_16_0032	2016_09_16_0036	2016_09_16_0039	2016_09_16_0042	2016_09_16_0045	2016_09_16_0048	2016_09_16_0051	2016_09_16_0054	2016_09_16_0056	2016_09_16_0058	2020_11_02_0006
0	14.542	12.859	17.014	7.658	6.171	11.763	7.022	5.819	10.9	7.933	14.774	12.147	12.871	11.691	1.642	3.016	4.856	11.742	5.271	7.137	3.806	9.133	7.895	6.802	7.682	8.356	4.092	7.444	7.366	8.263	7.559	7.117	2.311	6.063	7.424	6.652	4.694	13.959
0.1	13.896													12.098						7.23						8.454						6.863
1		9.79							10.321						0.97						3.214						3.367						1.501
3			10.312			6.03				5.483						1.9						5.862						6.639						2.965
10											3.284						1.004						0.926						2.936						2.322			3.481
30				0.316			0.145					0.868						0.483						1.077						2.42						0.844
100					0.184			0.192					0.838						0.071						0.949						0.926						0.475
1000
3000
Normalized
PcTx1 (nM)	2016_07_13_0035	2016_07_13_0039	2016_07_13_0043	2016_08_03_0004	2016_08_03_0009	2016_08_03_0015	2016_08_03_0020	2016_08_03_0027	2016_08_05_0012	2016_08_05_0016	2016_08_05_0022	2016_08_05_0027	2016_08_05_0032	2016_08_05_0037	2016_08_05_0042	2016_08_05_0047	2016_08_05_0052	2016_08_05_0057	2016_08_05_0063	2016_09_16_0003	2016_09_16_0007	2016_09_16_0011	2016_09_16_0015	2016_09_16_0019	2016_09_16_0023	2016_09_16_0026	2016_09_16_0029	2016_09_16_0032	2016_09_16_0036	2016_09_16_0039	2016_09_16_0042	2016_09_16_0045	2016_09_16_0048	2016_09_16_0051	2016_09_16_0054	2016_09_16_0056	2016_09_16_0058	2020_11_02_0006
0	1	1	1	1	1	1	1	1	1	1	1	1	1	1	1	1	1	1	1	1	1	1	1	1	1	1	1	1	1	1	1	1	1	1	1	1	1	1
0.1	0.955577													1.03481						1.01303						1.01173						0.964311
1		0.761334							0.946881						0.590743						0.844456						0.822825						0.649502
3			0.606089			0.512624				0.691163						0.629973						0.641848						0.891859						0.489032
10											0.222282						0.206755						0.117289						0.398588						0.312769			0.249373
30				0.041264			0.020649					0.071458						0.041134						0.158336						0.292872						0.126879
100					0.029817			0.032995					0.065108						0.01347						0.123536						0.122503						0.101193
1000
3000
FL_FL_WT
PcTx1 (nM)	2016_08_10_0007	2016_08_10_0012	2016_08_10_0021	2016_08_10_0024	2016_08_10_0040	2016_08_11_0000	2016_08_11_0005	2016_08_11_0010	2016_08_11_0015	2016_08_11_0021	2016_08_11_0026	2016_08_12_0013	2016_08_12_0021	2016_08_12_0024	2016_08_12_0028	2016_08_12_0032	2016_08_12_0036	2016_08_12_0039	2016_09_14_0001	2016_09_14_0006	2016_09_14_0011	2016_09_14_0022	2016_09_14_0025	2016_09_14_0028	2016_09_14_0033	2016_09_14_0038	2016_09_14_0043	2016_09_14_0048	2016_09_14_0051	2016_11_04_0017	2016_11_04_0021	2016_11_04_0025	2016_11_04_0027	2020_10_23_0005	2020_10_23_0007	2020_10_23_0010	2020_10_23_0012	2020_10_23_0015	2020_10_23_0020
0	9.228	25.079	18.943	24.322	28.726	3.014	14.339	8.862	7.618	10.313	11.601	15.474	20.295	3.357	21.095	20.529	14.506	28.031	2.299	12.794	12.521	6.524	2.632	9.259	5.414	6.323	7.817	7.274	4.487	5.089	13.546	8.832	4.494	8.464	8.888	12.785	15.682	12.446	20.498
0.1
1			17.199		25.521									2.364				27.446					2.941						4.26
3
10													22.845				14.128					5.496						5.487						6.543				10.204
30		12.439														16.626											5.116						4.604			8.854			14.198
100	1.898			12.557								10.743			15.195						4.801
300								1.556			0.604									2.945					1.011	3.105						4.281
1000										0.245									0.127					0.868													0.987
3000						0.046	1.26		0.151																					0.84	1.203				0.193
Normalized
PcTx1 (nM)	2016_08_10_0007	2016_08_10_0012	2016_08_10_0021	2016_08_10_0024	2016_08_10_0040	2016_08_11_0000	2016_08_11_0005	2016_08_11_0010	2016_08_11_0015	2016_08_11_0021	2016_08_11_0026	2016_08_12_0013	2016_08_12_0021	2016_08_12_0024	2016_08_12_0028	2016_08_12_0032	2016_08_12_0036	2016_08_12_0039	2016_09_14_0001	2016_09_14_0006	2016_09_14_0011	2016_09_14_0022	2016_09_14_0025	2016_09_14_0028	2016_09_14_0033	2016_09_14_0038	2016_09_14_0043	2016_09_14_0048	2016_09_14_0051	2016_11_04_0017	2016_11_04_0021	2016_11_04_0025	2016_11_04_0027	2020_10_23_0005	2020_10_23_0007	2020_10_23_0010	2020_10_23_0012	2020_10_23_0015	2020_10_23_0020
1	1	1	1	1	1	1	1	1	1	1	1	1	1	1	1	1	1	1	1	1	1	1	1	1	1	1	1	1	1	1	1	1	1	1	1	1	1	1	1
0.1
1			0.907934		0.888429									0.7042				0.97913					1.1174						0.949409
3
10													1.12565				0.973942					0.842428						0.75433						0.773039				0.819862
30		0.495993														0.809879											0.654471						1.02448			0.69253			0.692653
100	0.205678			0.516282								0.694261			0.720313						0.383436
300								0.175581			0.052064									0.230186					0.186738	0.491064						0.484715
1000										0.023756									0.055241					0.093747													0.062938
3000						0.015262	0.087872		0.019821																					0.165062	0.088809				0.021715
FL_WT_FL																																						Normalized
PcTx1 (nM)	2016_08_10_0008	2016_08_10_0013	2016_08_10_0018	2016_08_10_0022	2016_08_10_0026	2016_08_10_0031	2016_08_10_0038	2016_08_11_0001	2016_08_11_0006	2016_08_11_0011	2016_08_11_0016	2016_08_11_0022	2016_08_11_0027	2016_08_12_0014	2016_08_12_0018	2016_08_12_0022	2016_08_12_0025	2016_08_12_0029	2016_08_12_0033	2016_08_12_0037	2016_08_12_0040	2016_09_14_0002	2016_09_14_0007	2016_09_14_0012	2016_09_14_0017	2016_09_14_0023	2016_09_14_0029	2016_09_14_0039	2016_09_14_0044	2016_09_14_0049	2016_09_14_0052	2016_10_25_0001	2016_10_25_0009	2016_10_25_0010	2016_10_25_0012	2016_10_25_0013	2016_10_25_0020	2016_10_25_0021	2016_10_27_0000	2016_10_27_0001	2016_10_27_0003	2016_10_27_0004	2016_10_27_0006	2016_10_27_0007	2016_10_27_0008	2016_11_04_0000	2016_11_04_0001	2016_11_04_0002	2016_11_04_0003
0	13.875	21.299	19.579	26.299	27.804	22.564	26.027	2.755	1.706	8.7	10.458	6.007	5.855	17.719	15.583	11.389	23.961	21.854	14.251	15.288	15.915	4.538	11.321	1.749	2.351	6.574	5.625	5.741	7.47	6.044	7.853	3.855	8.765	6.253	11.612	13.395	8.51	11.991	11.147	10.131	4.91	3.122	3.253	10.561	8.073	8.29	9.102	11.336	9.446
0.1
1				27.23													24.135				13.921										7.864	4.771				15.488							3.657
3
10			18.103				25.763									14.295				16.826						5.636				5.654
30		22.191				24.289									15.554				13.535						1.152				5.957													1.866							7.586
100	13.61				28.577									19.579				18.017						0.665				2.038					4.027				3.868				3.366							6.73
300										8.384			5.08										3.489											0.94				2		3.916					4.755		5.668
1000									0.428			0.503										0.158					0.36								4.265				2.611					6.579		2.468
3000								0.144			0.491
Normalized
PcTx1 (nM)	2016_08_10_0013	2016_08_10_0018	2016_08_10_0022	2016_08_10_0026	2016_08_10_0031	2016_08_10_0038	2016_08_11_0001	2016_08_11_0006	2016_08_11_0011	2016_08_11_0016	2016_08_11_0022	2016_08_11_0027	2016_08_12_0014	2016_08_12_0018	2016_08_12_0022	2016_08_12_0025	2016_08_12_0029	2016_08_12_0033	2016_08_12_0037	2016_08_12_0040	2016_09_14_0002	2016_09_14_0007	2016_09_14_0012	2016_09_14_0017	2016_09_14_0023	2016_09_14_0029	2016_09_14_0039	2016_09_14_0044	2016_09_14_0049	2016_09_14_0052	2016_10_25_0001	2016_10_25_0009	2016_10_25_0010	2016_10_25_0012	2016_10_25_0013	2016_10_25_0020	2016_10_25_0021	2016_10_27_0000	2016_10_27_0001	2016_10_27_0003	2016_10_27_0004	2016_10_27_0006	2016_10_27_0007	2016_10_27_0008	2016_11_04_0000	2016_11_04_0001	2016_11_04_0002	2016_11_04_0003	2016_11_04_0004
0	1	1	1	1	1	1	1	1	1	1	1	1	1	1	1	1	1	1	1	1	1	1	1	1	1	1	1	1	1	1	1	1	1	1	1	1	1	1	1	1	1	1	1	1	1	1	1	1	1
0.1
1			1.0354													1.00726				0.874709										1.0014	1.23761				1.15625							1.12419
3
10		0.924613				0.989857									1.25516				1.1006						0.857317				0.935473																				0.952339
30	1.04188				1.07645									0.998139				0.949758						0.490004				0.797456													0.597694							0.803091
100				1.0278									1.10497				0.824426						0.380217				0.35499					0.459441				0.454524				0.68554							0.593684
300									0.963678			0.867635										0.308188											0.150328				0.166792		0.386536					0.589		0.62272
1000								0.250879			0.083736										0.034817					0.064								0.367292				0.234233					0.622952		0.297708
3000							0.052269			0.04695
WT_FL_FL
PcTx1 (nM)	2016_08_10_0009	2016_08_10_0014	2016_08_10_0020	2016_08_10_0027	2016_08_10_0032	2016_08_10_0039	2016_08_10_0042	2016_08_11_0002	2016_08_11_0007	2016_08_11_0012	2016_08_11_0017	2016_08_11_0023	2016_08_11_0028	2016_08_12_0019	2016_08_12_0023	2016_08_12_0026	2016_08_12_0030	2016_08_12_0034	2016_08_12_0038	2016_08_12_0041	2016_09_14_0003	2016_09_14_0008	2016_09_14_0013	2016_09_14_0018	2016_09_14_0024	2016_09_14_0040	2016_09_14_0045	2016_09_14_0050	2016_09_14_0053	2016_11_04_0016	2016_11_04_0020	2016_11_04_0024	2016_11_04_0026	2020_10_21_0002	2020_10_21_0008	2020_10_21_0011	2020_10_21_0015	2020_10_21_0019
0	20.437	14.834	6.771	15.6	18.718	22.094	17.462	8.066	6.286	3.892	8.007	23.008	15.075	15.208	21.858	22.575	26.107	28.404	23.291	24.996	3.942	5.342	1.873	8.083	2.698	3.632	6.386	3.87	7.112	11.678	4.239	11.531	15.159	11.931	14.796	11.988	3.93	18.194
0.1
1							16.414									22.693				24.6									7.074					11.641		12.172
3
10			4.609			19.704									23.293				21.993						2.633			2.678
30		10.772			10.948									13.584				22.199						5.069			5.606						13.51
100	7.698			8.936													18.995						0.203			1.48
300										1.47			6.128									0.672										8.891
1000									0.384			3.354									0.152																	1.269
3000								0.531			0.146																			0.566	0.264				0.038		0.019
Normalized
PcTx1 (nM)	2016_08_10_0009	2016_08_10_0014	2016_08_10_0020	2016_08_10_0027	2016_08_10_0032	2016_08_10_0039	2016_08_10_0042	2016_08_11_0002	2016_08_11_0007	2016_08_11_0012	2016_08_11_0017	2016_08_11_0023	2016_08_11_0028	2016_08_12_0019	2016_08_12_0023	2016_08_12_0026	2016_08_12_0030	2016_08_12_0034	2016_08_12_0038	2016_08_12_0041	2016_09_14_0003	2016_09_14_0008	2016_09_14_0013	2016_09_14_0018	2016_09_14_0024	2016_09_14_0040	2016_09_14_0045	2016_09_14_0050	2016_09_14_0053	2016_11_04_0016	2016_11_04_0020	2016_11_04_0024	2016_11_04_0026	2020_10_21_0002	2020_10_21_0008	2020_10_21_0011	2020_10_21_0015	2020_10_21_0019
0	1	1	1	1	1	1	1	1	1	1	1	1	1	1	1	1	1	1	1	1	1	1	1	1	1	1	1	1	1	1	1	1	1	1	1	1	1	1
0.1
1							0.939984									1.00523				0.984157									0.994657					0.975694		1.01535
3
10			0.680697			0.891826									1.06565				0.94427						0.975908			0.69199
30		0.72617			0.584892									0.893214				0.781545						0.627119			0.877858						0.89122
100	0.37667			0.572821													0.727583						0.108382			0.407489
300										0.377698			0.406501									0.125796										0.771052
1000									0.061088			0.145775									0.038559																	0.069748
3000								0.065832			0.018234																			0.048467	0.062279				0.002568		0.004835
FL_FL_FL
PcTx1 (nM)	2016_08_10_0010	2016_08_10_0015	2016_08_10_0028	2016_08_10_0035	2016_08_11_0003	2016_08_11_0008	2016_08_11_0013	2016_08_11_0018	2016_08_11_0024	2016_08_11_0029	2016_08_11_0032	2016_08_12_0012	2016_08_12_0016	2016_08_12_0020	2016_08_12_0027	2016_08_12_0031	2016_08_12_0035	2016_09_14_0004	2016_09_14_0009	2016_09_14_0014	2016_09_14_0020	2016_09_14_0031	2016_09_14_0036	2016_09_14_0041	2016_09_14_0046	2016_11_04_0018	2016_11_04_0022	2020_10_21_0003	2020_10_21_0006	2020_10_21_0009	2020_10_21_0013	2020_10_21_0017	2020_10_21_0024
0	17.734	6.509	11.135	13.04	3.535	5.536	1.581	9.198	1.888	14.875	3.733	9.43	21.277	14.337	22.957	20.497	19.172	0.82	1.745	2.64	1.303	4.521	1.392	3.557	4.428	3.07	13.239	2.749	21.579	7.503	17.078	14.735	18.977
0.1
1																												3.33
3
10														14.5			19.531												23.611		16.381	18.165	19.821
30		7.366		15.098									22.112			22.978					1.714				4.128
100	17.621		9.85									12.585			22.467					2.003				3.111
300							2.12			8.763									1.807				1.372
1000						1.488			0.73									0.285				1.275
3000					0.172			0.481			0.22															0.493	5.237			0.094
Normalized
PcTx1 (nM)	2016_08_10_0010	2016_08_10_0015	2016_08_10_0028	2016_08_10_0035	2016_08_11_0003	2016_08_11_0008	2016_08_11_0013	2016_08_11_0018	2016_08_11_0024	2016_08_11_0029	2016_08_11_0032	2016_08_12_0012	2016_08_12_0016	2016_08_12_0020	2016_08_12_0027	2016_08_12_0031	2016_08_12_0035	2016_09_14_0004	2016_09_14_0009	2016_09_14_0014	2016_09_14_0020	2016_09_14_0031	2016_09_14_0036	2016_09_14_0041	2016_09_14_0046	2016_11_04_0018	2016_11_04_0022	2020_10_21_0003	2020_10_21_0006	2020_10_21_0009	2020_10_21_0013	2020_10_21_0017	2020_10_21_0024
0	1	1	1	1	1	1	1	1	1	1	1	1	1	1	1	1	1	1	1	1	1	1	1	1	1	1	1	1	1	1	1	1	1
0.1
1																												1.21135
3
10														1.01137			1.01873												1.09417		0.959187	1.23278	1.04448
30		1.13166		1.15782									1.03924			1.12104					1.31543				0.932249
100	0.993628		0.884598									1.33457			0.978656					0.758712				0.874613
300							1.34092			0.589109									1.03553				0.985632
1000						0.268786			0.386653									0.347561				0.282017
3000					0.048656			0.052294			0.058934															0.160586	0.395574			0.012528
[truncated: 16 more columns]

## Sheet: Fits
Collected	mean	SD	N	mean	SD	N	mean	SD	N	mean	SD	N	mean	SD	N	mean	SD	N	mean	SD	N	mean	SD	N	mean	SD	N	mean	SD	N
PcTx1 (nM)	WT			F350L			WT/WT/WT			FL/WT/WT			WT/FL/WT			WT/WT/FL			FL/FL/WT			FL/WT/FL			WT/FL/FL			FL/FL/FL
0	1	0	63	1	0	33	1	0	45	1	0	36	1	0	36	1	0	38	1	0	39	1	0	64	1	0	38	1	0	33
0.1	0.818844	0.396185	10				0.945099	0.0582779	6	0.961219	0.074006	5	0.97688	0.0613875	5	0.995892	0.0342127	5
1	0.40773	0.323735	14	1.14787	0.17039	6	0.855914	0.102978	8	0.961468	0.129092	6	0.866488	0.145538	6	0.76929	0.131412	6	0.924417	0.134851	6	0.918929	0.322747	9	0.985845	0.0265817	6	1,21135*	0*	1*
3	0.180713	0.251517	9				0.695586	0.242844	8	0.638703	0.253193	6	0.783615	0.0937553	7	0.637513	0.13309	7
10	0.0650488	0.145252	11	1.16292	0.400915	7	0.439862	0.267923	6	0.518732	0.15797	6	0.322485	0.123953	6	0.251176	0.0961884	6	0.881541	0.142418	6	0.99283	0.126876	8	0.875057	0.156753	6	1.06012	0.0953863	6
30	0.0235085	0.0496883	10				0.133973	0.187602	9	0.077877	0.0459058	6	0.149729	0.11631	6	0.107513	0.0957048	7	0.728334	0.17683	6	0.865629	0.19337	10	0.76886	0.127955	7	1.11624	0.127629	6
100	0.0108036	0.0111307	9				0.019157	0.0150795	8	0.0574805	0.0438449	6	0.081359	0.0888312	6	0.0698031	0.0461862	7	0.503994	0.216028	5	0.671552	0.251924	11	0.438589	0.232042	5	0.970796	0.197269	6
300				1.10308	0.137714	4													0.270058	0.17883	6	0.528018	0.278062	10	0.420262	0.265685	4	0.987799	0.308725	4
1000				0.435769	0.38234	5													0.0589205	0.0287466	4	0.286761	0.19304	10	0.0787925	0.0465498	4	0.321254	0.0555623	4
3000				0.0287462	0.0309396	6													0.0664235	0.059125	6	0.0303552	0.0165276	6	0.0337025	0.0286666	6	0.121429	0.143199	6
Fits
	WT	F350L	WT/WT/WT	FL/WT/WT	WT/FL/WT	WT/WT/FL	FL/FL/WT	FL/WT/FL	WT/FL/FL	FL/FL/FL
[Inhibitor] vs. response -- Variable slope (four parameters)
Best-fit values
Bottom	= 0,000	= 0,000	= 0,000	= 0,000	= 0,000	= 0,000	= 0,000	= 0,000	= 0,000	= 0,000
Top	= 1,000	= 1,000	= 1,000	= 1,000	= 1,000	= 1,000	= 1,000	= 1,000	= 1,000	= 1,000
IC50	0.6118	980.1	6.523	7.307	6.636	4.211	94.58	289.9	108	797.1
HillSlope	-0.892	-12.83	-1.073	-1.141	-1.253	-1.038	-0.8752	-0.8437	-0.8425	-2.645
logIC50	-0.2134	2.991	0.8145	0.8637	0.8219	0.6244	1.976	2.462	2.033	2.901
Span	= 1,000	= 1,000	= 1,000	= 1,000	= 1,000	= 1,000	= 1,000	= 1,000	= 1,000	= 1,000
95% CI (profile likelihood)
IC50	0,4157 to 0,8619	???	5,222 to 8,126	5,883 to 9,046	5,744 to 7,679	3,646 to 4,854	74,43 to 120,1	218,1 to 387,2	83,40 to 140,8	654,1 to 962,4
HillSlope	-1,228 to -0,6768	???	-1,322 to -0,8789	-1,407 to -0,9315	-1,521 to -1,046	-1,207 to -0,8977	-1,074 to -0,7190	-1,065 to -0,6691	-1,026 to -0,6978	??? to -1,670
logIC50	-0,3812 to -0,06456	???	0,7178 to 0,9099	0,7696 to 0,9564	0,7592 to 0,8853	0,5619 to 0,6861	1,872 to 2,079	2,339 to 2,588	1,921 to 2,148	2,816 to 2,983
Goodness of Fit
Degrees of Freedom	124	59	88	69	70	74	76	126	74	63
R squared	0.8626	0.7573	0.9049	0.9175	0.9521	0.9661	0.9237	0.7622	0.9162	0.8626
Sum of Squares	3.525	2.12	1.195	0.7651	0.4258	0.361	0.7504	3.103	0.7721	0.8949
Sy.x	0.1686	0.1896	0.1165	0.1053	0.078	0.06984	0.09937	0.1569	0.1021	0.1192
Constraints
Bottom	Bottom = 0	Bottom = 0	Bottom = 0	Bottom = 0	Bottom = 0	Bottom = 0	Bottom = 0	Bottom = 0	Bottom = 0	Bottom = 0
Top	Top = 1	Top = 1	Top = 1	Top = 1	Top = 1	Top = 1	Top = 1	Top = 1	Top = 1	Top = 1
IC50	IC50 > 0	IC50 > 0	IC50 > 0	IC50 > 0	IC50 > 0	IC50 > 0	IC50 > 0	IC50 > 0	IC50 > 0	IC50 > 0
Number of points
# of X values	126	65	90	71	72	76	80	130	78	68
# Y values analyzed	126	61	90	71	72	76	78	128	76	65
