# Supplementary material for: Conformational decoupling in acid-sensing ion channels uncovers mechanism and stoichiometry of PcTx1-mediated inhibition
Source: eLife. 2022 Feb 14;11:e73384. doi: 10.7554/eLife.73384 (PMC8871370; doi:10.7554/eLife.73384)
Supplement: Figure 5—figure supplement 1—source data 1. [file elife-73384-fig5-figsupp1-data1.xlsx]

## Sheet: Data
KC_KC_KC
SSD
pH	210111_008	200111_009	200126_002	210208_000	210208_001	210208_003
7.6	1	1	1	1	1	1
7.3			1.08491	1.0336	0.922982	0.886062
7.2	0.705717	0.821719	0.990586		0.777831	0.634062
7.1	0.201375	0.287413	0.357761	0.413624	0.176624	0.394239
7	0.001518	0.005355	0.003382	0.028075	0.078983	0.046377
6.9	0.002307	0.001358	0.002328	0.001133	0.000311	0.001685
6.8	0.000237	0.0006	0.00217	0.019069	0.002129	0.001732
fluorescence
	210111_008	200111_009	200126_002	210208_000	210208_001	210208_003
7.3			0.04918	0.015081	0.003663	0.049803
7.2	0.245501	0.345633	0.171913		0.455959	0.525036
7.1	0.814111	0.708679	0.715068	0.57438	0.710938	0.735669
7	0.863214	0.886035	0.982097	0.889182	0.872852	0.858663
6.9	1.08818	1.1427	0.84375	0.802083	1.02218	0.967897
6.8	1.03367	1.1887	0.883951	1.23056	0.977376	0.878672
6.7
6	1	1	1	1	1	1
KC_KCFL_KC
SSD
	200111_009	200126_002	210208_000
7.6	1	1	1	1
7.3	1.14167	1.0083	0.777818	0.890166
7.2	0.900749	0.787215	0.650139	0.625603
7.1	0.568793	0.535358	0.348815
7	0.055129	0.12769	0.04691	0.024004
6.9	0.002154	0.004424	0.019463	0.001249
6.8	0.000314	0.001864	0.028678	0.001578
fluorescence
	210111_008	200111_009	200126_002	210208_000	210208_001
7.3	0.186941	0.035088	0.082312	0.031142	0.005094
7.2	0.291543	0.093496	0.346565	0.025591	0.23964
7.1	0.800725	0.713816	0.594595	0.572	0.768634
7	0.903818	0.858667	0.763441	0.806331	0.883303
6.9	0.995007	1.03247	0.96648	0.911937	0.983019
6.8	1.0328	0.920455	0.942675	1.00666	0.99297
6	1	1	1	1	1
KC_KCFL_KCFL
SSD
	201112_004	201112_005	201122_000	201122_001
7.6	1	1	1	1
7.3	0.917476	1.01469	1.12945	1.07045
7.2		1.03578	1.0536	0.983934
7.1	0.928992		0.55579	0.818503
7	0.143087	0.218456	0.104434	0.116275
6.9	0.019491	0.080514	0.013074	0.016382
6.8	0.150258		0.002347	0.001746
fluorescence
	201112_004	201112_005	201122_000	201122_001
7.3	0.038194	0.053512	0.002066	0.038627
7.2	0.00391	0.089903	0.109312	0.180488
7.1			0.667763	0.454976
7	0.666667	0.719225	0.869565	0.820809
6.9	0.854566	0.802575	0.961905	0.838828
6.8	1.26494	0.978788	0.977778	0.968037
6	1	1	1	1

## Sheet: Fits
Collected data from fits
	mean	SD	N
KC/KC/KC_SSD_IC50	7.13783	0.020084	6
KC/KC/KC_SSD_hill	11.5592	3.5137	6
KC/KC/KC_dF_EC50	7.15233	0.0303688	6
KC/KC/KC_dF_hill	-8.06867	2.40562	6
KC/KCFL/KC_SSD_IC50	7.13225	0.0379155	4
KC/KCFL/KC_SSD_hill	7.84225	1.95286	4
KC/KCFL/KC_dF_EC50	7.1378	0.0214056	5
KC/KCFL/KC_dF_hill	-9.0904	3.24352	5
KC/KCFL/KC_SSD_IC50	7.05975	0.0264118	4
KC/KCFL/KC_SSD_hill	15.04	5.11418	4
KC/KCFL/KC_dF_EC50	7.07475	0.0479679	4
KC/KCFL/KC_dF_hill	-7.719	2.52752	4
KC_KC_KC
SSD	210111_008	200111_009	200126_002	210208_000	210208_001	210208_003		Fluorescence
log(inhibitor) vs. response -- Variable slope (four parameters)									210111_008	200111_009	200126_002	210208_000	210208_001	210208_003
Best-fit values								log(agonist) vs. response -- Variable slope (four parameters)
Bottom	= 0,000	= 0,000	= 0,000	= 0,000	= 0,000	= 0,000		Best-fit values
Top	0.999	0.997	1.041	1.018	0.9748	0.9919		Bottom	= 0,000	= 0,000	= 0,000	= 0,000	= 0,000	= 0,000
LogIC50	7.161	7.137	7.117	7.111	7.152	7.149		Top	1.011	1.112	0.9299	1.047	0.9864	0.9273
HillSlope	10.02	10.95	16.26	14.31	11.67	6.145		LogEC50	7.154	7.138	7.146	7.108	7.17	7.198
IC50	14502039	13717251	13104011	12925307	14189592	14092627		HillSlope	-9.888	-5.709	-11.91	-6.059	-6.96	-7.886
Span	0.999	0.997	1.041	1.018	0.9748	0.9919		EC50	14240000	13749677	13993491	12826710	14784538	15786356
95% CI (profile likelihood)								Span	1.011	1.112	0.9299	1.047	0.9864	0.9273
Top	0,9565 to 1,042	0,9478 to 1,046	0,9812 to 1,103	0,9763 to 1,060	0,8913 to 1,065	0,8661 to 1,130		95% CI (profile likelihood)
LogIC50	7,153 to 7,170	7,127 to 7,147	??? to 7,132	??? to 7,125	7,131 to 7,172	7,109 to 7,190		Top	0,8636 to 1,201	0,9134 to 1,360	0,8283 to 1,035	0,7283 to 1,521	0,8618 to 1,133	0,8061 to 1,078
HillSlope	8,689 to 11,56	9,264 to 13,26	10,93 to ???	9,097 to ???	7,577 to 18,13	4,226 to 9,573		LogEC50	7,094 to 7,199	7,057 to 7,246	7,112 to 7,182	6,944 to 7,303	7,113 to 7,219	7,136 to 7,247
IC50	14212709 to 14787085	13398964 to 14037803	??? to 13548839	??? to 13345156	13526510 to 14861031	12859528 to 15495963		HillSlope	??? to -3,195	-18,79 to -2,220	-26,12 to -6,048	??? to -1,376	??? to -3,700	??? to -3,450
Goodness of Fit								EC50	12403118 to 15799981	11406669 to 17623807	12940631 to 15210840	8795505 to 20081813	12965120 to 16572831	13680137 to 17650396
Degrees of Freedom	3	3	4	3	4	4		Goodness of Fit
R squared	0.9994	0.9993	0.9976	0.9992	0.995	0.9911		Degrees of Freedom	3	3	4	3	4	4
Sum of Squares	0.0005338	0.0007158	0.003832	0.001005	0.006196	0.009736		R squared	0.9533	0.9356	0.9778	0.9078	0.9717	0.9621
Sy.x	0.01334	0.01545	0.03095	0.01831	0.03936	0.04934		Sum of Squares	0.0224	0.03177	0.02037	0.08174	0.02388	0.02549
Constraints								Sy.x	0.0864	0.1029	0.07135	0.1651	0.07726	0.07982
Bottom	Bottom = 0	Bottom = 0	Bottom = 0	Bottom = 0	Bottom = 0	Bottom = 0		Constraints
								Bottom	Bottom = 0	Bottom = 0	Bottom = 0	Bottom = 0	Bottom = 0	Bottom = 0
Number of points
# of X values	7	7	7	7	7	7		Number of points
# Y values analyzed	6	6	7	6	7	7		# of X values	8	8	8	8	8	8
								# Y values analyzed	6	6	7	6	7	7
KC_KCFL_KC
	200111_009	200126_002	210208_000					Fluorescence	210111_008	200111_009	200126_002	210208_000	210208_001
log(inhibitor) vs. response -- Variable slope (four parameters)								log(agonist) vs. response -- Variable slope (four parameters)
Best-fit values								Best-fit values
Bottom	= 0,000	= 0,000	= 0,000	= 0,000				Bottom	= 0,000	= 0,000	= 0,000	= 0,000	= 0,000
Top	1.05	1.005	0.9703	0.9906				Top	1.013	0.96	0.9897	0.9556	0.9754
LogIC50	7.098	7.102	7.156	7.173				LogEC50	7.164	7.133	7.132	7.108	7.152
HillSlope	10.35	7.309	5.647	8.063				HillSlope	-6.772	-13.14	-4.93	-10.46	-10.15
IC50	12520707	12652164	14325013	14884107				EC50	14573248	13568871	13554768	12832684	14199860
Span	1.05	1.005	0.9703	0.9906				Span	1.013	0.96	0.9897	0.9556	0.9754
95% CI (profile likelihood)								95% CI (profile likelihood)
Top	0,9200 to 1,201	0,9093 to 1,112	0,8198 to 1,142	0,9482 to 1,034				Top	0,9089 to 1,137	0,8660 to 1,061	0,9034 to 1,089	0,8405 to 1,104	0,9169 to 1,037
LogIC50	7,065 to 7,135	7,073 to 7,133	7,107 to 7,212	7,159 to 7,185				LogEC50	7,120 to 7,205	7,107 to 7,164	7,092 to 7,169	7,057 to 7,144	7,132 to 7,173
HillSlope	5,820 to ???	5,148 to 11,80	3,554 to 10,42	6,554 to 11,18				HillSlope	-15,54 to -3,732	??? to -6,413	-7,219 to -3,473	??? to -4,740	-15,13 to -6,954
IC50	11613004 to 13659884	11837729 to 13593803	12801161 to 16279788	14425911 to 15297548				EC50	13191009 to 16039344	12785417 to 14599100	12367725 to 14761888	11414682 to 13930125	13539674 to 14878589
Goodness of Fit								Goodness of Fit
Degrees of Freedom	4	4	4	3				Degrees of Freedom	4	4	4	4	4
R squared	0.9874	0.9937	0.9877	0.9994				R squared	0.9766	0.9842	0.9891	0.9817	0.9938
Sum of Squares	0.0191	0.00773	0.01195	0.0006192				Sum of Squares	0.01769	0.01698	0.007984	0.02045	0.006118
Sy.x	0.06909	0.04396	0.05465	0.01437				Sy.x	0.0665	0.06516	0.04468	0.0715	0.03911
Constraints								Constraints
Bottom	Bottom = 0	Bottom = 0	Bottom = 0	Bottom = 0				Bottom	Bottom = 0	Bottom = 0	Bottom = 0	Bottom = 0	Bottom = 0
Number of points								Number of points
# of X values	7	7	7	7				# of X values	7	7	7	7	7
# Y values analyzed	7	7	7	6				# Y values analyzed	7	7	7	7	7
KC_KCFL_KCFL
	201112_004	201112_005	201122_000	201122_001				Fluorescence	201112_004	201112_005	201122_000	201122_001		190912_002
log(inhibitor) vs. response -- Variable slope (four parameters)								log(agonist) vs. response -- Variable slope (four parameters)
Best-fit values								Best-fit values
Bottom	= 0,000	= 0,000	= 0,000	= 0,000				Bottom	= 0,000	= 0,000	= 0,000	= 0,000
Top	0.959	1.024	1.079	1.022				Top	1.104	0.983	0.9641	0.9694
LogIC50	7.034	7.049	7.096	7.06				LogEC50	7.017	7.058	7.128	7.096
HillSlope	22.35	11.14	11.92	14.75				HillSlope	-7.318	-5.885	-11.4	-6.273
IC50	10808778	11181863	12464760	11469890				EC50	10391981	11417865	13417209	12466124
Span	0.959	1.024	1.079	1.022				Span	1.104	0.983	0.9641	0.9694
95% CI (profile likelihood)								95% CI (profile likelihood)
Top	0,7773 to 1,170	0,8919 to 1,189	0,9847 to 1,181	0,9705 to 1,074				Top	0,7878 to 1,499	0,8441 to 1,151	0,9064 to 1,026	0,8797 to 1,076
LogIC50	???	??? to 7,124	7,072 to 7,118	7,045 to 7,074				LogEC50	6,912 to ???	6,994 to 7,129	7,109 to 7,147	7,058 to 7,130
HillSlope	6,658 to ???	4,705 to ???	7,307 to ???	11,01 to 21,20				HillSlope	??? to -2,466	??? to -3,381	-20,69 to -7,505	-10,69 to -4,095
IC50	???	??? to 13319649	11807988 to 13107557	11087120 to 11845633				EC50	8165943 to ???	9867461 to 13466943	12854694 to 14012054	11415937 to 13477260
Goodness of Fit								Goodness of Fit
Degrees of Freedom	3	2	4	4				Degrees of Freedom	3	3	4	4
R squared	0.9757	0.9943	0.9927	0.9974				R squared	0.9523	0.9887	0.9945	0.9897
Sum of Squares	0.02632	0.005196	0.01159	0.00389				Sum of Squares	0.06366	0.01033	0.005968	0.00935
Sy.x	0.09367	0.05097	0.05384	0.03118				Sy.x	0.1457	0.05868	0.03863	0.04835
Constraints								Constraints
Bottom	Bottom = 0	Bottom = 0	Bottom = 0	Bottom = 0				Bottom	Bottom = 0	Bottom = 0	Bottom = 0	Bottom = 0
Number of points								Number of points
# of X values	7	6	7	7				# of X values	7	7	7	7
# Y values analyzed	6	5	7	7				# Y values analyzed	6	6	7	7
