# Supplementary material for: Conformational decoupling in acid-sensing ion channels uncovers mechanism and stoichiometry of PcTx1-mediated inhibition
Source: eLife. 2022 Feb 14;11:e73384. doi: 10.7554/eLife.73384 (PMC8871370; doi:10.7554/eLife.73384)
Supplement: Figure 5—source data 1. [file elife-73384-fig5-data1.xlsx]

## Sheet: Data
SSS= K105C/K105C/K105C
SDS= K105C/K105C-F350L/K105C
SDD= K105C/K105C-F350L/K105C-F350L
Fluorescence
SSS PcTx	SSS 3min wash	SDS PcTx	SDS 3min wash	SDD PcTx	SDD 3min wash	KCFL PcTx 7.3	KCFLwash	KC PcTx	KC 3min pH 7.4
1.50845	0.760345	0.93306	0.752562	0.787387	0.02746	0.241873	0.032258	1.23731	0.723477
1.20889	0.797263	1.17967	0.40481	0.51405	0.385852	0.322684	0.014851	1.14155
1.56491	0.834081	0.967914	0.424033	0.486161	0.032178	0.297697		1.00451	0.123438
0.966236	0.902364	1.27869	0.326923	0.945148	0.162946	0.776541	0.006902	1.06005	0.598049
1.12249	0.837302	0.851675	0.496255	0.785256	0.118367	0.588592	0.096528	1.05964
1.14697	0.835535	0.937068	0.514391			0.55576	0.015298	1.02485	0.8889
		0.851675	0.496255					1.06209
		0.937068	0.514391					1.13945	0.885825
								1.16797	0.840215
								1.11798
								1.22668
								1.21755
								1.16322

## Sheet: Results
Unpaired t test of PcTx_SSS vs SDS
Table Analyzed	Concatemers_PcTx and wash
Column C	SDS PcTx
vs.	vs,
Column A	SSS PcTx
Mann Whitney test
P value	0.038
Exact or approximate P value?	Exact
P value summary	*
Significantly different (P < 0.05)?	Yes
One- or two-tailed P value?	Two-tailed
Sum of ranks in column A,C	61 , 44
Mann-Whitney U	8
Difference between medians
Median of column A	1,178, n=6
Median of column C	0,9371, n=8
Difference: Actual	-0.2409
Difference: Hodges-Lehmann	-0.2559
Unpaired t test of PcTx_SSS vs SDD
Table Analyzed	Concatemers_PcTx and wash
Column E	SDD PcTx
vs.	vs,
Column A	SSS PcTx
Mann Whitney test
P value	0.0043
Exact or approximate P value?	Exact
P value summary	**
Significantly different (P < 0.05)?	Yes
One- or two-tailed P value?	Two-tailed
Sum of ranks in column A,E	51 , 15
Mann-Whitney U	0
Difference between medians
Median of column A	1,178, n=6
Median of column E	0,7853, n=5
Difference: Actual	-0.3927
Difference: Hodges-Lehmann	-0.5859
Unpaired t test of PcTx_SDS vs SDD
Table Analyzed	Concatemers_PcTx and wash
Column E	SDD PcTx
vs.	vs,
Column C	SDS PcTx
Mann Whitney test
P value	0.028
Exact or approximate P value?	Exact
P value summary	*
Significantly different (P < 0.05)?	Yes
One- or two-tailed P value?	Two-tailed
Sum of ranks in column C,E	71 , 20
Mann-Whitney U	5
Difference between medians
Median of column C	0,9371, n=8
Median of column E	0,7853, n=5
Difference: Actual	-0.1518
Difference: Hodges-Lehmann	-0.3356
Unpaired t test of wash_SSS vs SDS
Table Analyzed	Concatemers_PcTx and wash
Column D	SDS 3min wash
vs.	vs,
Column B	SSS 3min wash
Mann Whitney test
P value	0.0003
Exact or approximate P value?	Exact
P value summary	***
Significantly different (P < 0.05)?	Yes
One- or two-tailed P value?	Two-tailed
Sum of ranks in column B,D	69 , 36
Mann-Whitney U	0
Difference between medians
Median of column B	0,8348, n=6
Median of column D	0,4963, n=8
Difference: Actual	-0.3386
Difference: Hodges-Lehmann	-0.3393
Unpaired t test of wash_SSS vs SDD
Table Analyzed	Concatemers_PcTx and wash
Column F	SDD 3min wash
vs.	vs,
Column B	SSS 3min wash
Mann Whitney test
P value	0.0043
Exact or approximate P value?	Exact
P value summary	**
Significantly different (P < 0.05)?	Yes
One- or two-tailed P value?	Two-tailed
Sum of ranks in column B,F	51 , 15
Mann-Whitney U	0
Difference between medians
Median of column B	0,8348, n=6
Median of column F	0,1184, n=5
Difference: Actual	-0.7164
Difference: Hodges-Lehmann	-0.7181
Unpaired t test of wash_SDS vs SDD
Table Analyzed	Concatemers_PcTx and wash
Column F	SDD 3min wash
vs.	vs,
Column D	SDS 3min wash
Mann Whitney test
P value	0.0023
Exact or approximate P value?	Exact
P value summary	**
Significantly different (P < 0.05)?	Yes
One- or two-tailed P value?	Two-tailed
Sum of ranks in column D,F	75 , 16
Mann-Whitney U	1
Difference between medians
Median of column D	0,4963, n=8
Median of column F	0,1184, n=5
Difference: Actual	-0.3779
Difference: Hodges-Lehmann	-0.3697
ANOVA Concatemers_PcTx
Number of families	1
Number of comparisons per family	2
Alpha	0.05
Dunnett's multiple comparisons test	Mean Diff,	95,00% CI of diff,	Below threshold?	Summary	Adjusted P Value	A-?
SSS PcTx vs. SDS PcTx	0.2609	0,008153 to 0,5136	Yes	*	0.0429	C	SDS PcTx
SSS PcTx vs. SDD PcTx	0.5494	0,2660 to 0,8328	Yes	***	0.0005	E	SDD PcTx
Test details	Mean 1	Mean 2	Mean Diff,	SE of diff,	n1	n2	q	DF
SSS PcTx vs. SDS PcTx	1.253	0.9921	0.2609	0.1043	6	8	2.501	16
SSS PcTx vs. SDD PcTx	1.253	0.7036	0.5494	0.117	6	5	4.697	16
ANOVA Concatemers_wash
Number of families	1
Number of comparisons per family	2
Alpha	0.05
Dunnett's multiple comparisons test	Mean Diff,	95,00% CI of diff,	Below threshold?	Summary	Adjusted P Value	B-?
SSS 3min wash vs. SDS 3min wash	0.3366	0,1884 to 0,4848	Yes	****	<0,0001	D	SDS 3min wash
SSS 3min wash vs. SDD 3min wash	0.6825	0,5163 to 0,8486	Yes	****	<0,0001	F	SDD 3min wash
Test details	Mean 1	Mean 2	Mean Diff,	SE of diff,	n1	n2	q	DF
SSS 3min wash vs. SDS 3min wash	0.8278	0.4912	0.3366	0.06116	6	8	5.504	16
SSS 3min wash vs. SDD 3min wash	0.8278	0.1454	0.6825	0.06858	6	5	9.952	16
KCFL vs SDD wash
Table Analyzed	Concatemers_PcTx and wash
Column H	KCFLwash
vs.	vs,
Column F	SDD 3min wash
Mann Whitney test
P value	0.0952
Exact or approximate P value?	Exact
P value summary	ns
Significantly different (P < 0.05)?	No
One- or two-tailed P value?	Two-tailed
Sum of ranks in column F,H	36 , 19
Mann-Whitney U	4
Difference between medians
Median of column F	0,1184, n=5
Median of column H	0,01530, n=5
Difference: Actual	-0.1031
Difference: Hodges-Lehmann	-0.08611
KC vs SSS_PcTx
Table Analyzed	Concatemers_PcTx and wash
Column I	KC PcTx
vs.	vs,
Column A	SSS PcTx
Mann Whitney test
P value	0.3676
Exact or approximate P value?	Exact
P value summary	ns
Significantly different (P < 0.05)?	No
One- or two-tailed P value?	Two-tailed
Sum of ranks in column A,I	71 , 119
Mann-Whitney U	28
Difference between medians
Median of column A	1,178, n=6
Median of column I	1,139, n=13
Difference: Actual	-0.03848
Difference: Hodges-Lehmann	-0.07716
KCFL vs SDD_PcTx
Table Analyzed	Concatemers_PcTx and wash
Column G	KCFL PcTx 7,3
vs.	vs,
Column E	SDD PcTx
Mann Whitney test
P value	0.1255
Exact or approximate P value?	Exact
P value summary	ns
Significantly different (P < 0.05)?	No
One- or two-tailed P value?	Two-tailed
Sum of ranks in column E,G	39 , 27
Mann-Whitney U	6
Difference between medians
Median of column E	0,7853, n=5
Median of column G	0,4392, n=6
Difference: Actual	-0.346
Difference: Hodges-Lehmann	-0.2229
KC vs SSS_ wash
Table Analyzed	Concatemers_PcTx and wash
Column J	KC 3min pH 7,4
vs.	vs,
Column B	SSS 3min wash
Mann Whitney test
P value	0.6991
Exact or approximate P value?	Exact
P value summary	ns
Significantly different (P < 0.05)?	No
One- or two-tailed P value?	Two-tailed
Sum of ranks in column B,J	42 , 36
Mann-Whitney U	15
Difference between medians
Median of column B	0,8348, n=6
Median of column J	0,7818, n=6
Difference: Actual	-0.05296
Difference: Hodges-Lehmann	-0.04951

## Sheet: Graph
PcTx							3 min wash
