# Supplementary material for: Conformational decoupling in acid-sensing ion channels uncovers mechanism and stoichiometry of PcTx1-mediated inhibition
Source: eLife journal article supplement (doi:10.7554/elife.73384), 2022-02-14
Supplement: supp [file elife_poa_e73384_Figure_1_source_data_1.xlsx]

## Sheet: Data
pH	WT			WT act 30 nM			WT SSD			WT SSD 30 nM
	mean	SD	N	mean	SD	N	mean	SD	N	mean	SD	N
8										1.10448	0.223741	9
7.9
7.8							0.982274	0.0275534	6	1.01466	0.222606	9
7.7				0.00453267	0.00509115	7
7.6							0.891373	0.0905339	6	0.242192	0.167982	9
7.5
7.4				0.266792	0.129335	7	0.923933	0.120716	6	0.00255144	0.00285215	9
7.3
7.2							0.13574	0.178963	6	0.000795678	0.000525203	9
7.1	0.000943613	0.000748317	17	0.684635	0.112041	7	0.0298521	0.0565957	6
7							0.00234962	0.00290468	6	0.00072375	0.000351314	4
6.9	0.0534257	0.052118	6
6.8	0.12963	0.111982	5	0.870539	0.0965907	3
6.7	0.505403	0.197956	15	0.911662	0.0429049	4
6.6
6.5	0.817663	0.105473	17	0.932908	0.0777269	7
6.4
6.3
6.2	0.962022	0.0600072	11
6.1
6	0.97122	0.0627381	18	0.981147	0.0250767	7

## Sheet: Results
	WT	WT act 30 nM	WT SSD	WT SSD 30 nM
log(agonist) vs. response -- Variable slope (four parameters)
Best-fit values
Bottom	= 0,000	= 0,000	= 0,000	= 0,000
Top	= 1,000	= 1,000	= 1,000	1.107
LogEC50	6.679	7.217	7.286	7.669
HillSlope	-4.245	-2.495	9.225	7.995
EC50	4780732	16495728	19306112	46691328
Span	= 1,000	= 1,000	= 1,000	1.107
95% CI (profile likelihood)
LogEC50	6,660 to 6,698	7,179 to 7,255	??? to 7,315	1,005 to 1,217
HillSlope	-5,185 to -3,542	-3,079 to -2,048	6,900 to ???	??? to 7,706
EC50	4570195 to 4993867	15095317 to 17981975	??? to 20664660	5,504 to ???
Goodness of Fit				??? to 50836589
Degrees of Freedom	87	40	34
R squared	0.9279	0.9497	0.9498	46
Sum of Squares	1.058	0.2977	0.3658	0.9185
Sy.x	0.1103	0.08627	0.1037	1.023
Constraints				0.1491
Bottom	Bottom = 0	Bottom = 0	Bottom = 0
Top	Top = 1	Top = 1	Top = 1	Bottom = 0
Number of points
# of X values	103	56	42	54
# Y values analyzed	89	42	36	49
