# Supplementary material for: Conformational decoupling in acid-sensing ion channels uncovers mechanism and stoichiometry of PcTx1-mediated inhibition
Source: eLife journal article supplement (doi:10.7554/elife.73384), 2022-02-14
Supplement: supp [file elife_poa_e73384_Figure_2_source_data_2.xlsx]

## Sheet: Data
PcTx1 at pH 8.0 with different washes
	PcTx1 pH 8.0	wash ph 7.4 after PcTx	wash pH 7.4 after 8.0	wash pH 7 after 5.5
210707_002	0.039463	0.814442	0.202156	0.8949
210707_003	-0.09914	0.583843	0.0381194	0.937981
210707_004	-0.07141		0.140933	1.00396
210707_005	-0.06461	0.753134	0.0607287
210710_005	-0.15947	0.659284
210710_006	-0.11267	0.673672
210710_007	-0.09244	0.641282
Transposed
PcTx1 pH 8.0	0.039463	-0.09914	-0.07141	-0.06461	-0.15947	-0.11267	-0.09244
wash ph 7.4 after PcTx	0.814442	0.583843		0.753134	0.659284	0.673672	0.641282
wash pH 7.4 after 8.0	0.202156	0.0381194	0.140933	0.0607287
wash pH 7.4 after 5.5	0.8949	0.937981	1.00396
