# Supplementary material for: Conformational decoupling in acid-sensing ion channels uncovers mechanism and stoichiometry of PcTx1-mediated inhibition
Source: eLife journal article supplement (doi:10.7554/elife.73384), 2022-02-14
Supplement: supp [file elife_poa_e73384_Figure_2_source_data_3.xlsx]

## Sheet: Data
Application of BigDyn and PcTx1
Control BigDyn	BigDyn Post PcTx1	Control PcTx	PcTx post BigDyn	control PcTx1	post PcTx1
-0.76263	0.346401	0.804288	0.798139	1.25668	1.13242
-0.6087	0.431002	0.913989	0.888323	1.18302	1.14861
-1.05981	0.718032	1.02999	0.646598
-0.68642	0.08308	0.928065	0.750246
-0.87047	0.455926	0.99143
-1.07397	0.982427	0.516142		1.00085	1.03399
				1.18296	1.18087
				1.15569	1.20017
				1.42421	1.35317

## Sheet: Results
Descriptive statistics
	Control BigDyn	BigDyn Post PcTx1	Control PcTx	PcTx post BigDyn	control PcTx1	post PcTx1
Number of values	6	6	6	4	6	6
Minimum	-1.074	0.08308	0.5161	0.6466	1.001	1.034
Maximum	-0.6087	0.9824	1.03	0.8883	1.424	1.353
Range	0.4653	0.8993	0.5139	0.2417	0.4234	0.3192
Mean	-0.8437	0.5028	0.864	0.7708	1.201	1.175
Std. Deviation	0.1934	0.3112	0.1871	0.1007	0.1383	0.1047
Std. Error of Mean	0.07895	0.1271	0.07637	0.05034	0.05647	0.04274
Lower 95% CI of mean	-1.047	0.1762	0.6677	0.6106	1.055	1.065
Upper 95% CI of mean	-0.6407	0.8294	1.06	0.931	1.346	1.285
