# Supplementary material for: Conformational decoupling in acid-sensing ion channels uncovers mechanism and stoichiometry of PcTx1-mediated inhibition
Source: eLife journal article supplement (doi:10.7554/elife.73384), 2022-02-14
Supplement: supp [file elife_poa_e73384_Figure_3_source_data_3.xlsx]

## Sheet: Data
PcTx1 application and wash K105C vs K105CF350L
PcTx 7.4 (KC)	3 min wash pH 7.4 (KC)	PcTx pH 7.3 (KCFL)	3 min wash 7.3 (KCFL)	PcTx 7,4 (KCFL)
1.23208	0.723477	0.241873	0.032258	0.037053
1.23731		0.322684	0.014851	-0.00078
1.14155	0.123438	0.297697		0.006261
1.00451	0.598049	0.776541	0.006902	0.005647
1.06005		0.588592	0.096528	0.045936
1.05964	0.8889	0.55576	0.015298	0.018824
1.02485
1.06209	0.885825
1.13945	0.840215
1.16797
1.11798
1.22668
1.21755
1.16322
PcTx1 application and wash V80C vs V80CF350L						transformed
PcTx 7.7 (VC)	3min wash pH 7.7 (VC)	PcTx pH 7.4 (VCFL)	3min wash 7.4 (VCFL)			PcTx 7.7 (VC)	3min wash pH 7.7 (VC)	PcTx pH 7.4 (VCFL)	3min wash 7.4 (VCFL)
0.894251	0.613328	1.02551				-0.894251	-0.613328	-1.02551
0.791784		0.774524				-0.791784		-0.774524
0.782285		0.682474	0.0234139			-0.782285		-0.682474	-0.0234139
0.816054	0.387823	0.650673	0.0593525			-0.816054	-0.387823	-0.650673	-0.0593525
0.805899		0.709993	0.00319882			-0.805899		-0.709993	-0.00319882
0.912167		0.683513	0.0848485			-0.912167		-0.683513	-0.0848485
1.00707	0.934901	0.783094	0.01222			-1.00707	-0.934901	-0.783094	-0.01222
0.836529		0.291925	0.170213			-0.836529		-0.291925	-0.170213
0.756594						-0.756594
0.815567						-0.815567
0.860568	0.803876					-0.860568	-0.803876
0.957707						-0.957707
0.924841	0.762344					-0.924841	-0.762344

## Sheet: Results
KC vs KCFL_PcTx
Table Analyzed	KC vs KCFL
Column C	PcTx pH 7,3 (KCFL)
vs.	vs,
Column A	PcTx 7,4 (KC)
Mann Whitney test
P value	<0,0001
Exact or approximate P value?	Exact
P value summary	****
Significantly different (P < 0.05)?	Yes
One- or two-tailed P value?	Two-tailed
Sum of ranks in column A,C	189 , 21
Mann-Whitney U	0
Difference between medians
Median of column A	1,140, n=14
Median of column C	0,4392, n=6
Difference: Actual	-0.7013
Difference: Hodges-Lehmann	-0.6817
KC vs KCFL_wash
Table Analyzed	KC vs KCFL
Column D	3 min wash 7,3 (KCFL)
vs.	vs,
Column B	3 min wash pH 7,4 (KC)
Mann Whitney test
P value	0.0043
Exact or approximate P value?	Exact
P value summary	**
Significantly different (P < 0.05)?	Yes
One- or two-tailed P value?	Two-tailed
Sum of ranks in column B,D	51 , 15
Mann-Whitney U	0
Difference between medians
Median of column B	0,7818, n=6
Median of column D	0,01530, n=5
Difference: Actual	-0.7665
Difference: Hodges-Lehmann	-0.7301
VC vs VCFL_PcTx
Table Analyzed	VC vs VCFL
Column C	PcTx pH 7,4 (VCFL)
vs.	vs,
Column A	PcTx 7,7 (VC)
Mann Whitney test
P value	0.0077
Exact or approximate P value?	Exact
P value summary	**
Significantly different (P < 0.05)?	Yes
One- or two-tailed P value?	Two-tailed
Sum of ranks in column A,C	179 , 52
Mann-Whitney U	16
Difference between medians
Median of column A	0,8365, n=13
Median of column C	0,6968, n=8
Difference: Actual	-0.1398
Difference: Hodges-Lehmann	-0.1333
95.54% CI of difference	-0,2424 to -0,04153
Exact or approximate CI?	Exact
VC vs VCFL_wash
Table Analyzed	VC vs VCFL
Column D	3min wash 7,4 (VCFL)
vs.	vs,
Column B	pH 7,7 (VC)
Mann Whitney test
P value	0.0043
Exact or approximate P value?	Exact
P value summary	**
Significantly different (P < 0.05)?	Yes
One- or two-tailed P value?	Two-tailed
Sum of ranks in column B,D	45 , 21
Mann-Whitney U	0
Difference between medians
Median of column B	0,7623, n=5
Median of column D	0,04138, n=6
Difference: Actual	-0.721
Difference: Hodges-Lehmann	-0.6902
