# Supplementary material for: Conformational decoupling in acid-sensing ion channels uncovers mechanism and stoichiometry of PcTx1-mediated inhibition
Source: eLife journal article supplement (doi:10.7554/elife.73384), 2022-02-14
Supplement: supp [file elife_poa_e73384_Figure_4_source_data_1.xlsx]

## Sheet: Data
wt mASIC1a															normalized values															wt mASIC1a
pH	2016_04_19_0000	2016_04_20_0006	2016_04_20_0010	2016_04_21_0000	2016_04_28_0000	2016_04_28_0007	2016_04_28_0013	2016_05_06_0000	2016_05_06_0005	2016_05_06_0010					pH	2016_04_19_0000	2016_04_20_0006	2016_04_20_0010	2016_04_21_0000	2016_04_28_0000	2016_04_28_0007	2016_04_28_0013	2016_05_06_0000	2016_05_06_0005	2016_05_06_0010					pH	mean	SD	N
7.1	0.004	0.039	0.023	0.001	-0.015	-0.01	0.005	0.007	-0.005	0.038					7.1	0.000298396	0.00292135	0.000840244	0.000657462	-0.00676285	-0.00616143	0.000610799	0.00211289	-0.00081182	0.0119987					7.1	0.000570378	0.00516047	10
6.9	0.519	0.342	0.547	0.048	-0.029	0.01	0.085	0.143	0.033	0.046					6.9	0.0387169	0.025618	0.0199832	0.0315582	-0.0130748	0.00616143	0.0103836	0.0431633	0.00535801	0.0145248					6.9	0.0182393	0.0171377	10
6.8				0.5	0.198	0.141	1.114	0.783	0.724	0.149					6.8				0.328731	0.0892696	0.0868762	0.136086	0.236342	0.117552	0.0470477					6.8	0.148843	0.0990865	7
6.7	8.46	7.109	7.217	0.681	1.01	0.547	3.939	2.719	3.656	1.254					6.7	0.631108	0.532509	0.263654	0.447732	0.455365	0.33703	0.481187	0.820706	0.593603	0.395958					6.7	0.495885	0.159169	10
6.6				1.367	1.889	0.682	7.533	3.313	6.067	2.303					6.6				0.898751	0.851668	0.420209	0.92023	1	0.985063	0.727187					6.6	0.829015	0.201979	7
6.5	13.405	12.182	20.962												6.5	1	0.912509	0.765791												6.5	0.892767	0.118346	3
6.4				1.521	2.005	1.521	8.067	3.025	5.234	2.804					6.4				1	0.903968	0.937153	0.985463	0.91307	0.849813	0.88538					6.4	0.924978	0.0535971	7
6.3	12.78	13.35	23.639												6.3	0.953376	1	0.863588												6.3	0.938988	0.0693347	3
6.2					2.218	1.623	8.186	3.172	6.159	3.167					6.2					1	1	1	0.95744	1	1					6.2	0.992907	0.0173749	6
6.1	12.623	12.593	26.089												6.1	0.941664	0.943296	0.953092												6.1	0.946017	0.00618139	3
6				1.357											6				0.892176											6	0.892176	0	1
5.8	12.796	10.78	27.373												5.8	0.954569	0.807491	1												5.8	0.920687	0.100628	3
WT_WT_WT															normalized values															WT_WT_WT
pH	2016_04_19_0001	2016_04_20_0007	2016_04_21_0001	2016_04_21_0008	2016_04_28_0001	2016_04_28_0008	2016_04_28_0014	2016_05_06_0001	2016_05_06_0006	2016_05_06_0012					pH	2016_04_19_0001	2016_04_20_0007	2016_04_21_0001	2016_04_21_0008	2016_04_28_0001	2016_04_28_0008	2016_04_28_0014	2016_05_06_0001	2016_05_06_0006	2016_05_06_0012					pH	mean	SD	N
7.1	0.012	0.014	0.004	0.008	0.007	0.005	0.003	0.03	0.026	0.018					7.1	0.00114384	0.000546491	0.000578035	0.000476531	0.000465518	0.000213484	0.000165125	0.00375704	0.00106991	0.000869229					7.1	0.000928521	0.00104626	10
6.9	1.581	2.825	0.573	1.729	0.544	0.515	0.178	0.168	2.675	1.191					6.9	0.150701	0.110274	0.0828035	0.10299	0.0361774	0.0219888	0.00979745	0.0210394	0.110078	0.057514					6.9	0.0703363	0.0478637	10
6.8			4.049	7.425	3.734	5.699	1.228	1.035	5.395	2.585					6.8			0.585116	0.44228	0.248321	0.243329	0.0675914	0.129618	0.222007	0.124831					6.8	0.257887	0.174454	8
6.7	6.301	12.223	4.97	6.453	9.211	14.132	5.014	4.303	17.467	11.703					6.7	0.60061	0.477125	0.718208	0.384382	0.612556	0.60339	0.27598	0.538885	0.718777	0.565144					6.7	0.549506	0.139157	10
6.6			6.193	13.792	15.037	15.63	10.963	6.453	21.007	20.229					6.6			0.894942	0.821539	1	0.66735	0.603424	0.80814	0.86445	0.976869					6.6	0.829589	0.138469	8
6.5	10.258	22.987													6.5	0.97779	0.897299													6.5	0.937545	0.0569162	2
6.4			6.92	14.784	15.033	23.421	16.844	6.495	22.764	18.648					6.4			1	0.880629	0.999734	1	0.927125	0.8134	0.936752	0.900522					6.4	0.93227	0.0671645	8
6.3	9.508	25.118													6.3	0.906301	0.980482													6.3	0.943392	0.0524545	2
6.2					15.004	21.867	18.168	7.985	24.301	20.708					6.2					0.997805	0.933649	1	1	1	1					6.2	0.988576	0.0269227	6
6.1	10.491														6.1	1														6.1	1	0	1
6			6.824	16.788											6			0.986127	1											6	0.993064	0.00980957	2
5.8	10.04	25.618													5.8	0.957011	1													5.8	0.978505	0.030398	2
F350L_WT_WT															normalized values															F350L_WT_WT
pH	2016_04_20_0008	2016_04_20_0014	2016_04_21_0002	2016_04_21_0007	2016_04_21_0012	2016_04_28_0002	2016_05_06_0002	2016_05_06_0007							pH	2016_04_20_0008	2016_04_20_0014	2016_04_21_0002	2016_04_21_0007	2016_04_21_0012	2016_04_28_0002	2016_05_06_0002	2016_05_06_0007	2016_04_28_0016	2016_05_06_0003	2016_05_06_0008	2016_05_06_0014	2016_05_06_0018		pH	mean	SD	N
7.1	0.009	0.096	0.002	0.004	0.007	-0.016	0.07	0.003							7.1	0.00101055	0.00381755	0.000461467	0.000350109	0.000846842	-0.00738348	0.0033761	0.0005386	0.000217332	8.20244e-05	0.00143816	0.00293918	0.00090834		7.1	0.000377218	0.00341662	8
6.9	0.24	0.633	0.032	0.014	0.033	-0.068	0.135	0.034							6.9	0.0269481	0.025172	0.00738348	0.00122538	0.00399226	-0.0313798	0.00651104	0.00610413	0.00364032	0.00250174	0.00527325	0.00474791	0.00371594		6.9	0.00574458	0.0178571	8
6.8			0.63	0.675	0.245	0.054	0.491	0.062							6.8			0.145362	0.059081	0.0296395	0.0249192	0.0236809	0.0111311	0.0348275	0.0161588	0.0129434	0.0186525	0.020768		6.8	0.048969	0.049834	6
6.7	4.051	14.27	0.531	0.349	0.946	0.068	3.85	0.509							6.7	0.454862	0.567463	0.12252	0.030547	0.114445	0.0313798	0.185685	0.0913824	0.0734583	0.291227	0.084372	0.349084	0.657308		6.7	0.199786	0.200875	8
6.6			2.432	5.999	4.511	0.58	11.656	3.114							6.6			0.561144	0.525077	0.545729	0.267651	0.562168	0.559066	0.681717	0.703605	0.833653	0.593941	0.75417		6.6	0.503473	0.116384	6
6.5	6.448	21.235													6.5	0.724006	0.844435													6.5	0.784221	0.0851558	2
6.4			2.701	10.082	5.945	1.717	19.662	4.144							6.4			0.623212	0.882451	0.719211	0.79234	0.948297	0.743986	0.74909	0.808637	0.694631	1	1		6.4	0.784916	0.116964	6
6.3	6.43	25.147													6.3	0.721985	1													6.3	0.860993	0.196586	2
6.2						2.167	20.734	5.57							6.2						1	1	1	1	1	1	0.75277	0.898803		6.2	1	0	3
6.1	8.803	23.346													6.1	0.988435	0.928381													6.1	0.958408	0.0424643	2
6			4.334	11.425	8.266										6			1	1	1										6	1	0	3
5.8	8.906	21.015													5.8	1	0.835686													5.8	0.917843	0.116187	2
WT_FL_WT															normalized values															WT_FL_WT
pH	2016_04_19_0004	2016_04_20_0009	2016_04_21_0003	2016_04_21_0006	2016_04_21_0011	2016_04_21_0015	2016_04_28_0004	2016_04_28_0010	2016_04_28_0016	2016_05_06_0003	2016_05_06_0008	2016_05_06_0014	2016_05_06_0018		pH	2016_04_19_0004	2016_04_20_0009	2016_04_21_0003	2016_04_21_0006	2016_04_21_0011	2016_04_21_0015	2016_04_28_0004	2016_04_28_0010	2016_04_28_0016	2016_05_06_0003	2016_05_06_0008	2016_05_06_0014	2016_05_06_0018		pH	mean	SD	N
7.1	0.002	0.006	0.002	0.006	0.011	0.003	0.002	0.005	0.004	0.002	0.003	0.026	0.022		7.1	0.000220046	0.000231419	0.000100251	0.000799361	0.000592258	0.000197511	0.000188342	0.000383406	0.000217332	8.20244e-05	0.00143816	0.00293918	0.00090834		7.1	0.000638279	0.000796512	13
6.9	0.053	0.342	0.184	0.026	0.111	0.107	0.049	0.046	0.067	0.061	0.011	0.042	0.09		6.9	0.00583122	0.0131909	0.00922306	0.0034639	0.00597642	0.00704457	0.00461437	0.00352734	0.00364032	0.00250174	0.00527325	0.00474791	0.00371594		6.9	0.00559622	0.00289658	13
6.8			2.456	0.783	0.373	1.5	0.165	0.336	0.641	0.394	0.027	0.165	0.503		6.8			0.123108	0.104317	0.0200829	0.0987557	0.0155382	0.0257649	0.0348275	0.0161588	0.0129434	0.0186525	0.020768		6.8	0.0446287	0.041965	11
6.7	1.459	4.861	9.235	0.355	3.974	3.731	1.261	1.4	1.352	7.101	0.176	3.088	15.92		6.7	0.160524	0.187488	0.462907	0.0472955	0.213967	0.245638	0.118749	0.107354	0.0734583	0.291227	0.084372	0.349084	0.657308		6.7	0.230721	0.175216	13
6.6			11.295	1.674	5.824	11.402	7.952	7.47	12.547	17.156	1.739	5.254	18.266		6.6			0.566165	0.223022	0.313573	0.750675	0.748846	0.572809	0.681717	0.703605	0.833653	0.593941	0.75417		6.6	0.612925	0.191015	11
6.5	3.409	19.604													6.5	0.375069	0.756123													6.5	0.565596	0.269446	2
6.4			18.328	7.506	18.215	11.784	9.419	11.221	13.787	19.717	1.449	8.846	24.22		6.4			0.918697	1	0.980725	0.775825	0.886995	0.86044	0.74909	0.808637	0.694631	1	1		6.4	0.879549	0.110777	11
6.3	8.335	25.927													6.3	0.917043	1													6.3	0.958521	0.0586598	2
6.2							10.619	13.041	18.405	24.383	2.086	6.659	21.769		6.2							1	1	1	1	1	0.75277	0.898803		6.2	0.950225	0.0948865	7
6.1	6.969	18.866													6.1	0.766751	0.727658													6.1	0.747205	0.0276426	2
6			19.95	6.875	18.573	15.189									6			1	0.915934	1	1									6	0.978983	0.042033	4
5.8	9.089	25.223													5.8	1	0.972847													5.8	0.986423	0.0192002	2
WT_WT_FL															normalized values															WT_WT_FL
pH	2016_04_20_0005	2016_04_20_0013	2016_04_21_0004	2016_04_21_0005	2016_04_21_0010	2016_04_28_0006	2016_04_28_0011	2016_04_28_0017	2016_05_06_0004	2016_05_06_0009					pH	2016_04_20_0005	2016_04_20_0013	2016_04_21_0004	2016_04_21_0005	2016_04_21_0010	2016_04_28_0006	2016_04_28_0011	2016_04_28_0017	2016_05_06_0004	2016_05_06_0009	2016_06_01_0002	2016_06_01_0004	2016_06_01_0008		pH	mean	SD	N
7.1	-0.006	0.032	0.003	-0.002	0.011	-0.003	0.008	0.017	0.01	0.047					7.1	-0.00169827	0.00115245	0.000212359	-0.000161225	0.000583926	-0.000545256	0.000878928	0.000907441	0.00127926	0.00380536	0.000282512	0.000469631	0.000240703		7.1	0.000641497	0.00143448	10
6.9	0.029	0.768	0.078	0.056	0.204	0.016	0.027	0.093	0.065	0.14					6.9	0.00820832	0.0276587	0.00552134	0.00451431	0.0108292	0.00290803	0.00296638	0.00496424	0.00831521	0.0113351					6.9	0.00872209	0.00729762	10
6.8			0.995	0.385	1.772	0.098	0.087	0.753	0.154	0.332					6.8			0.0704325	0.0310359	0.0940652	0.0178117	0.00955834	0.0401943	0.0197007	0.0268804	0.0096996	0.0267689	0.0192562		6.8	0.0387099	0.0290798	8
6.7	0.07	13.698	6.454	1.109	8.428	0.451	0.566	2.702	1.657	2.486					6.7	0.0198132	0.493319	0.456856	0.0893994	0.447394	0.0819702	0.0621841	0.14423	0.211974	0.201279	0.0244844	0.109894	0.0806355		6.7	0.220842	0.179428	10
6.6			12.627	7.688	12.589	4.49	4.316	12.659	5.098	7.76					6.6			0.89382	0.61975	0.668277	0.816067	0.474181	0.675723	0.652168	0.628289	0.457199	0.224014	0.46239		6.6	0.678535	0.12751	8
6.5	2.89	25.051													6.5	0.818002	0.902186									0.84895	0.830698	0.963052		6.5	0.860094	0.0595273	2
6.4			11.985	8.435	17.052	5.058	7.513	17.542	5.336	9.262					6.4			0.848375	0.679968	0.905192	0.919302	0.825423	0.936372	0.682615	0.749899					6.4	0.818393	0.103422	8
6.3	2.357	27.767													6.3	0.667138	1									1	1	0.964978		6.3	0.833569	0.235369	2
6.2						5.502	9.102	18.734	7.817	12.351					6.2						1	1	1	1	1					6.2	1	0	5
6.1	3.533	21.58													6.1	1	0.777182									0.905452	0.912805	1		6.1	0.888591	0.157556	2
6			14.127	12.405	18.838										6			1	1	1										6	1	0	3
5.8	3.153	26.946													5.8	0.892443	0.970433													5.8	0.931438	0.0551471	2
FL_FL_WT															normalized values															FL_FL_WT
pH	2016_05_12_0000	2016_05_12_0006	2016_05_12_0009	2016_05_19_0001	2016_05_19_0003	2016_05_19_0006	2016_05_25_0000	2016_05_25_0001	2016_05_25_0002	2016_05_25_0003	2016_06_01_0002	2016_06_01_0004	2016_06_01_0008		pH	2016_05_12_0000	2016_05_12_0006	2016_05_12_0009	2016_05_19_0001	2016_05_19_0003	2016_05_19_0006	2016_05_25_0000	2016_05_25_0001	2016_05_25_0002	2016_05_25_0003	2016_06_01_0002	2016_06_01_0004	2016_06_01_0008		pH	mean	SD	N
6.9				0.01	0.008	0.044	0.129	-0.008	0.245	0.299	0.003	0.006	0.002		6.9				0.000702642	0.00119439	0.00216503	0.00609958	-0.000687699	0.0114438	0.0145096	0.000282512	0.000469631	0.000240703		6.9	0.00364202	0.00530713	10
6.8	0.06	0.127	-0.009												6.8	0.00654522	0.01403	-0.00174284												6.8	0.00627748	0.00788985	3
6.7				0.453	0.108	1.703	3.762	0.319	3.162	0.788	0.103	0.342	0.16		6.7				0.0318297	0.0161242	0.0837967	0.177881	0.027422	0.147695	0.0382394	0.0096996	0.0267689	0.0192562		6.7	0.0578712	0.0593064	10
6.6	1.879	2.574	0.535	1.738	0.58	7.979	4.704	0.858	10.209	3.933	0.26	1.404	0.67		6.6	0.204974	0.284357	0.103602	0.122119	0.086593	0.392609	0.222422	0.0737557	0.476856	0.190857	0.0244844	0.109894	0.0806355		6.6	0.182551	0.133805	13
6.5	4.801	5.68	0.658	5.7754	2.424	7.872	6.503	7.928	16.699	13.213	4.855	2.862	3.842		6.5	0.523726	0.627486	0.127421	0.405804	0.361899	0.387344	0.307485	0.681509	0.779999	0.64119	0.457199	0.224014	0.46239		6.5	0.460574	0.187931	13
6.4	7.063	7.229	1.712	13.504	3.561	8.809	16.112	5.584	13.734	5.898	9.015	10.613	8.002		6.4	0.770481	0.798608	0.331526	0.948848	0.531651	0.43345	0.761833	0.480014	0.641506	0.286213	0.84895	0.830698	0.963052		6.4	0.663602	0.229107	13
6.3	6.068	9.052	3.402												6.3	0.66194	1	0.658792												6.3	0.773577	0.196094	3
6.2				9.121	6.698	19.772	18.959	9.484	21.409	20.607	10.619	12.776	8.018		6.2				0.64088	1	0.972888	0.896449	0.815267	1	1	1	1	0.964978		6.2	0.929046	0.118055	10
6.1	9.167	7.89													6.1	1	0.871631													6.1	0.935815	0.0907709	2
6				14.232	5.739	20.323	21.149	11.633	20.93	17.961	9.615	11.662	8.309		6				1	0.856823	1	1	1	0.977626	0.871597	0.905452	0.912805	1		6	0.95243	0.0590678	10
5.8	8.796	8.748	5.164												5.8	0.959529	0.966416	1												5.8	0.975315	0.0216534	3
FL_WT_FL															normalized values															FL_WT_FL
pH	2016_05_19_0000	2016_05_19_0002	2016_05_19_0004	2016_05_24_0001	2016_05_24_0003	2016_05_24_0005	2016_05_31_0001	2016_05_31_0007							pH	2016_05_19_0000	2016_05_19_0002	2016_05_19_0004	2016_05_24_0001	2016_05_24_0003	2016_05_24_0005	2016_05_31_0001	2016_05_31_0007							pH	mean	SD	N
6.9	0.009	0.016	0.034	0.018	0.021	0.338	0.025	0.023							6.9	0.000751943	0.00100038	0.00217044	0.00277008	0.00501552	0.0301033	0.00328127	0.00177141							6.9	0.00585805	0.00989001	8
6.8															6.8															6.8
6.7	0.402	0.947	1.013	0.32	0.063	0.519	0.099	0.536							6.7	0.0335868	0.0592097	0.0646665	0.0492459	0.0150466	0.0462237	0.0129938	0.0412816							6.7	0.0402818	0.0188824	8
6.6	0.944	2.551	4.116	1.371	0.504	1.251	1.055	0.752							6.6	0.0788704	0.159497	0.262751	0.210988	0.120373	0.111418	0.13847	0.0579174							6.6	0.142536	0.0677335	8
6.5	5.249	6.011	6.807	1.321	0.894	2.517	1.026	4.266							6.5	0.43855	0.375828	0.434536	0.203293	0.213518	0.224172	0.134663	0.328558							6.5	0.29414	0.115576	8
6.4	7.443	12.279	12.513	3.868	2.289	4.487	3.001	7.69							6.4	0.621856	0.767725	0.798787	0.59526	0.546692	0.399626	0.393884	0.592267							6.4	0.589512	0.147747	8
6.3															6.3															6.3
6.2	11.35	15.214	12.801	6.498	4.012	10.125	7.404	10.686							6.2	0.948283	0.951232	0.817172	1	0.958204	0.901763	0.971781	0.823013							6.2	0.921431	0.0682563	8
6.1															6.1															6.1
6	11.969	15.994	15.665	6.095	4.187	11.228	7.619	12.984							6	1	1	1	0.937981	1	1	1	1							6	0.992248	0.0219271	8
5.8																														5.8
WT_FL_FL															normalized values															WT_FL_FL
pH	2016_05_10_0002	2016_05_10_0005	2016_05_12_0008	2016_05_24_0002	2016_05_24_0004	2016_05_31_0000	2016_05_31_0002	2016_05_31_0011	2016_05_31_0012	2016_06_01_0003					pH	2016_05_10_0002	2016_05_10_0005	2016_05_12_0008	2016_05_24_0002	2016_05_24_0004	2016_05_31_0000	2016_05_31_0002	2016_05_31_0011	2016_05_31_0012	2016_06_01_0003					pH	mean	SD	N
6.9				0.435	0.119	0.071	-0.005	0.007	0.012	0.005					6.9				0.0625449	0.00882135	0.00399797	-0.000600312	0.000349755	0.0016835	0.000649266					6.9	0.0110638	0.0229222	7
6.8	0.023	0.047	0.138												6.8	0.00638357	0.00658171	0.0459694												6.8	0.0196449	0.0227979	3
6.7				1.278	1.059	0.268	0.098	0.443	0.07	0.755					6.7				0.183753	0.0785026	0.0150909	0.0117661	0.0221345	0.00982043	0.0980392					6.7	0.0598724	0.0650629	7
6.6	0.296	1.056	0.737	2.472	4.561	3.267	0.682	0.654	1.496	1.005					6.6	0.0821538	0.147878	0.245503	0.355428	0.338102	0.183963	0.0818826	0.0326771	0.209877	0.130503					6.6	0.180797	0.108193	10
6.5	1.14	3.981	0.395	3.857	10.7	3.546	3.558	3.794	1.342	4.792					6.5	0.316403	0.557485	0.131579	0.554565	0.79318	0.199673	0.427182	0.189567	0.188272	0.622257					6.5	0.398016	0.226485	10
6.4	1.564	4.568	0.992	6.955	11.303	2.882	3.521	16.995	2.283	7.701					6.4	0.434083	0.639686	0.330446	1	0.83788	0.162284	0.42274	0.849156	0.320286	1					6.4	0.599656	0.305811	10
6.3	2.266	6.263	2.884												6.3	0.62892	0.877048	0.960693												6.3	0.82222	0.172548	3
6.2				6.091	13.434	11.842	6.321	14.891	7.128	7.518					6.2				0.875773	0.995849	0.666817	0.758915	0.744029	1	0.976237					6.2	0.85966	0.137114	7
6.1	2.922	7.141	3.002												6.1	0.810991	1	1												6.1	0.936997	0.109124	3
6				5.533	13.49	17.759	8.329	20.014	6.568	6.634					6				0.795543	1	1	1	1	0.921437	0.861447					6	0.939775	0.0834494	7
5.8	3.603	6.446	2.796												5.8	1	0.902675	0.931379												5.8	0.944685	0.0500083	3
FL_FL_FL															normalized values															FL_FL_FL
pH	2016_08_17_0003	2016_08_17_0005	2016_08_17_0008	2016_08_17_0009	2016_08_19_0001	2016_08_19_0003	2016_08_19_0005								pH	2016_08_17_0003	2016_08_17_0005	2016_08_17_0008	2016_08_17_0009	2016_08_19_0001	2016_08_19_0003	2016_08_19_0005								pH	mean	SD	N
6.8	0.002	0.002	0.013	0.009	0.005	0.035	0.001								6.8	0.000306326	0.000503905	0.00140343	0.00333087	0.000799361	0.00282874	0.000204541								6.8	0.0013396	0.00126049	7
6.6	0.058	0.01	0.101	0.004	0.201	0.863	0.06								6.6	0.00888344	0.00251953	0.0109036	0.00148038	0.0321343	0.0697486	0.0122724								6.6	0.019706	0.0242767	7
6.4	0.112	0.144	0.48	0.008	1.135	5.167	0.708								6.4	0.0171542	0.0362812	0.0518191	0.00296077	0.181455	0.417603	0.144815								6.4	0.121727	0.146556	7
6.3	1.706	1.049	1.671	0.469	2.268	4.806	1.485								6.3	0.261296	0.264298	0.180395	0.173575	0.36259	0.388426	0.303743								6.3	0.276332	0.0825537	7
6.1	5.74	1.775	7.069	1.641	5.106	10.84	3.361								6.1	0.879155	0.447216	0.763144	0.607328	0.816307	0.876101	0.687462								6.1	0.725245	0.157484	7
5.9	5.902	2.789	6.873	2.045	4.997	11.625	3.555								5.9	0.903967	0.702696	0.741984	0.756847	0.798881	0.939546	0.727143								5.9	0.795866	0.0914404	7
5.6	6.529	3.969	9.263	2.702	6.255	12.373	4.889								5.6	1	1	1	1	1	1	1								5.6	1	0	7
F350L															normalized values															F350L
pH	2016_08_17_0000	2016_08_17_0002	2016_08_17_0007	2016_08_19_0000	2016_08_19_0002	2016_08_19_0004	2016_08_19_0006								pH	2016_08_17_0000	2016_08_17_0002	2016_08_17_0007	2016_08_19_0000	2016_08_19_0002	2016_08_19_0004	2016_08_19_0006								pH	mean	SD	N
6.8	0.007	0.02	0.005	0.041	0.057	0.005	0.029								6.8	0.000271802	0.000759129	0.00179727	0.00518069	0.00569601	0.000271695	0.00184737								6.8	0.00226057	0.00226862	7
6.6	0.918	0.955	0.052	1.237	0.949	1.567	0.624								6.6	0.0356449	0.0362484	0.0186916	0.156305	0.0948336	0.0851492	0.0397503								6.6	0.0666605	0.0484489	7
6.4	6.695	8.862	0.25	5.189	4.98	9.638	5.866								6.4	0.25996	0.33637	0.0898634	0.655673	0.497652	0.523719	0.373678								6.4	0.390988	0.187163	7
6.3	16.698	8.791	0.479	5.604	5.264	13.477	8.694								6.3	0.648365	0.333675	0.172178	0.708112	0.526032	0.732326	0.553829								6.3	0.524931	0.20561	7
6.1	23.921	19.891	1.193	7.716	8.788	17.677	15.557								6.1	0.928827	0.754991	0.428828	0.974981	0.878185	0.96055	0.991018								6.1	0.84534	0.200415	7
5.9	25.115	25.501	1.802	7.065	8.501	16.5	14.301								5.9	0.975188	0.967927	0.647735	0.892722	0.849505	0.896593	0.911008								5.9	0.87724	0.110313	7
5.6	25.754	26.346	2.782	7.914	10.007	18.403	15.698								5.6	1	1	1	1	1	1	1								5.6	1	0	7

## Sheet: Results
Collected EC50s
WT	WT/WT/WT	F350L/WT/WT	WT/F350L/WT	WT/WT/F350L	F350L/F350L/WT	F350L/WT/F350L	WT/F350L/F350L	F350L/F350L/F350L	F350L
6.728	6.74	6.614	6.467	6.562	6.482	6.454	6.36	6.228	6.336
6.705	6.694	6.708	6.587	6.693	6.532	6.474	6.482	6.065	6.249
6.6	6.792	6.531	6.646	6.692	6.349	6.491	6.38	6.17	6.036
6.714	6.711	6.603	6.552	6.561	6.49	6.426	6.551	6.114	6.437
6.689	6.734	6.556	6.565	6.663	6.428	6.413	6.563	6.233	6.346
6.597	6.702	6.51	6.649	6.638	6.443	6.376	6.282	6.299	6.401
6.7	6.628	6.613	6.635	6.568	6.469	6.377	6.381	6.163	6.337
6.757	6.699	6.569	6.61	6.629	6.447	6.419	6.454
6.716	6.741		6.624	6.589	6.568		6.37
6.664	6.714		6.645	6.602	6.429		6.523
			6.64		6.488
			6.636		6.457
			6.711		6.496
Collected Hill
WT	WT/WT/WT	F350L/WT/WT	WT/F350L/WT	WT/WT/F350L	F350L/F350L/WT	F350L/WT/F350L	WT/F350L/F350L	F350L/F350L/F350L	F350L
-8.371	-4.971	-2.712	-3.598	-10.01	-3.749	-5.3	-3.142		-6.469
-6.206	-4.654	-5.223	-5.594	-5.75	-5.573	-6.174	-4.716	-2.743	-3.255
-4.269	-6.011	-3.008	-4.504	-10.02	-5.231	-4.599	-12.76	-4.283	-2.671
-5.929	-3.823	-13.7	-10.85	-3.96	-10.48	-5.411	-5.11	-3.566	-3.946
-8.72	-8.322	-4.109	-6.385	-5.498	-5.107	-5.806	-7.168	-3.547	-2.952
-4.639	-4.891	-5.317	-7.687	-16.9	-3.208	-4.662	-3.793	-3.305	-4.629
-9.177	-6.003	-7.488	-13.3	-5.827	-4.302	-6.236	-3.381	-2.769	-4.684
-11.6	-6.814	-4.707	-8.891	-10.5	-3.541	-4.5	-13.56
-11.25	-7.297		-13.71	-4.014	-3.957		-5.353
-6.878	-10.32		-7.36	-4.758	-3.231		-10.63
			-17.28		-9.841
			-6.171		-11.36
			-9.29		-12.16
WT															WT
	2016_04_19_0000	2016_04_20_0006	2016_04_20_0010	2016_04_21_0000	2016_04_28_0000	2016_04_28_0007	2016_04_28_0013	2016_05_06_0000	2016_05_06_0005	2016_05_06_0010						pH50	Hill
log(agonist) vs. response -- Variable slope (four parameters)															2016_04_19_0000	6.728	-8.371
Best-fit values															2016_04_20_0006	6.705	-6.206
Bottom	= 0,000	= 0,000	= 0,000	= 0,000	= 0,000	= 0,000	= 0,000	= 0,000	= 0,000	= 0,000					2016_04_20_0010	6.6	-4.269
Top	= 1,000	= 1,000	= 1,000	= 1,000	= 1,000	= 1,000	= 1,000	= 1,000	= 1,000	= 1,000					2016_04_21_0000	6.714	-5.929
LogEC50	6.728	6.705	6.6	6.714	6.689	6.597	6.7	6.757	6.716	6.664					2016_04_28_0000	6.689	-8.72
HillSlope	-8.371	-6.206	-4.269	-5.929	-8.72	-4.639	-9.177	-11.6	-11.25	-6.878					2016_04_28_0007	6.597	-4.639
EC50	5346925	5071254	3980999	5174409	4890509	3956705	5016146	5713294	5205208	4611679					2016_04_28_0013	6.7	-9.177
Span	= 1,000	= 1,000	= 1,000	= 1,000	= 1,000	= 1,000	= 1,000	= 1,000	= 1,000	= 1,000					2016_05_06_0000	6.757	-11.6
95% CI (profile likelihood)															2016_05_06_0005	6.716	-11.25
LogEC50	??? to 6,758	6,629 to 6,775	6,555 to 6,643	6,666 to 6,763	6,669 to 6,709	6,553 to 6,637	6,692 to 6,709	6,739 to 6,775	6,690 to 6,745	6,632 to 6,691					2016_05_06_0010	6.664	-6.878
HillSlope	??? to -5,207	??? to -2,815	-6,500 to -2,930	-11,69 to -3,386	-13,73 to -6,129	-6,999 to -3,282	-11,18 to -7,740	-17,06 to -8,119	??? to -6,374	-10,79 to -4,396
EC50	??? to 5730389	4257835 to 5956221	3590944 to 4395678	4632525 to 5790189	4669165 to 5113194	3573719 to 4337147	4915824 to 5120159	5476770 to 5954222	4901990 to 5563563	4286932 to 4912734
Goodness of Fit
Degrees of Freedom	5	5	5	5	5	5	5	5	5	5
R squared	0.9935	0.9613	0.9902	0.9648	0.9921	0.9846	0.9984	0.9918	0.9811	0.9869
Sum of Squares	0.007778	0.04288	0.01153	0.03742	0.009639	0.01645	0.002114	0.01007	0.02383	0.0146
Sy.x	0.03944	0.09261	0.04802	0.08651	0.04391	0.05735	0.02056	0.04488	0.06904	0.05404
Constraints
Bottom	Bottom = 0	Bottom = 0	Bottom = 0	Bottom = 0	Bottom = 0	Bottom = 0	Bottom = 0	Bottom = 0	Bottom = 0	Bottom = 0
Top	Top = 1	Top = 1	Top = 1	Top = 1	Top = 1	Top = 1	Top = 1	Top = 1	Top = 1	Top = 1
Number of points
# of X values	12	12	12	11	9	9	9	9	9	9
# Y values analyzed	7	7	7	7	7	7	7	7	7	7
WT_WT_WT
	2016_04_19_0001	2016_04_20_0007	2016_04_21_0001	2016_04_21_0008	2016_04_28_0001	2016_04_28_0008	2016_04_28_0014	2016_05_06_0001	2016_05_06_0006	2016_05_06_0012						LogEC50	HillSlope
log(agonist) vs. response -- Variable slope (four parameters)															2016_04_19_0001	6.74	-4.971
Best-fit values															2016_04_20_0007	6.694	-4.654
Bottom	= 0,000	= 0,000	= 0,000	= 0,000	= 0,000	= 0,000	= 0,000	= 0,000	= 0,000	= 0,000					2016_04_21_0001	6.792	-6.011
Top	= 1,000	= 1,000	= 1,000	= 1,000	= 1,000	= 1,000	= 1,000	= 1,000	= 1,000	= 1,000					2016_04_21_0008	6.711	-3.823
LogEC50	6.74	6.694	6.792	6.711	6.734	6.702	6.628	6.699	6.741	6.714					2016_04_28_0001	6.734	-8.322
HillSlope	-4.971	-4.654	-6.011	-3.823	-8.322	-4.891	-6.003	-6.814	-7.297	-10.32					2016_04_28_0008	6.702	-4.891
EC50	5496015	4941923	6191936	5139519	5414748	5039844	4247613	5001165	5514398	5173348					2016_04_28_0014	6.628	-6.003
Span	= 1,000	= 1,000	= 1,000	= 1,000	= 1,000	= 1,000	= 1,000	= 1,000	= 1,000	= 1,000					2016_05_06_0001	6.699	-6.814
95% CI (profile likelihood)															2016_05_06_0006	6.741	-7.297
LogEC50	6,701 to 6,781	6,685 to 6,703	6,748 to 6,833	6,628 to 6,785	6,715 to 6,752	6,650 to 6,749	6,617 to 6,639	6,647 to 6,741	6,716 to 6,767	6,693 to 6,736					2016_05_06_0012	6.714	-10.32
HillSlope	-8,897 to -3,404	-5,144 to -4,246	-12,12 to -3,567	-7,760 to -1,973	-11,20 to -6,337	-8,374 to -3,004	-7,011 to -5,183	-20,00 to -3,316	-11,87 to -4,793	??? to -6,616
EC50	5023577 to 6040680	4836797 to 5049403	5601817 to 6804047	4250390 to 6089602	5191804 to 5653185	4471605 to 5604382	4139060 to 4351690	4434044 to 5511897	5200098 to 5841872	4931528 to 5450085
Goodness of Fit
Degrees of Freedom	5	4	5	5	5	5	5	5	5	5
R squared	0.9892	0.9996	0.9723	0.9427	0.9938	0.9718	0.9986	0.9661	0.9877	0.9887
Sum of Squares	0.01143	0.0004173	0.02873	0.0527	0.00789	0.02879	0.001589	0.03568	0.01334	0.01381
Sy.x	0.0478	0.01021	0.0758	0.1027	0.03972	0.07588	0.01783	0.08448	0.05165	0.05255
Constraints
Bottom	Bottom = 0	Bottom = 0	Bottom = 0	Bottom = 0	Bottom = 0	Bottom = 0	Bottom = 0	Bottom = 0	Bottom = 0	Bottom = 0
Top	Top = 1	Top = 1	Top = 1	Top = 1	Top = 1	Top = 1	Top = 1	Top = 1	Top = 1	Top = 1
Number of points
# of X values	12	12	11	11	9	9	9	9	9	9
# Y values analyzed	7	6	7	7	7	7	7	7	7	7
F350L_WT_WT
	2016_04_20_0008	2016_04_20_0014	2016_04_21_0002	2016_04_21_0007	2016_04_21_0012	2016_04_28_0002	2016_05_06_0002	2016_05_06_0007								LogEC50	HillSlope
log(agonist) vs. response -- Variable slope (four parameters)															2016_04_20_0008	6.614	-2.708
Best-fit values															2016_04_20_0014	6.708	-5.179
Bottom	= 0,000	= 0,000	= 0,000	= 0,000	= 0,000	= 0,000	= 0,000	= 0,000							2016_04_21_0002	6.531	-3.006
Top	= 1,000	= 1,000	= 1,000	= 1,000	= 1,000	= 1,000	= 1,000	= 1,000							2016_04_21_0007	6.603	-13.65
LogEC50	6.614	6.708	6.531	6.603	6.556	6.51	6.613	6.569							2016_04_21_0012	6.556	-4.104
HillSlope	-2.708	-5.179	-3.006	-13.65	-4.104	-5.675	-7.404	-4.703							2016_04_28_0002	6.51	-5.675
EC50	4108475	5100753	3399119	4007130	3600412	3237576	4105740	3703202							2016_05_06_0002	6.613	-7.404
Span	= 1,000	= 1,000	= 1,000	= 1,000	= 1,000	= 1,000	= 1,000	= 1,000							2016_05_06_0007	6.569	-4.703
95% CI (profile likelihood)
LogEC50	6,490 to 6,726	6,620 to 6,783	6,388 to 6,634	6,554 to 6,624	6,453 to 6,637	6,484 to 6,536	6,605 to 6,621	6,471 to 6,647
HillSlope	-6,266 to -1,527	??? to -2,454	-7,276 to -1,572	??? to -4,757	??? to -2,220	-7,101 to -4,618	-8,535 to -6,466	??? to -2,519
EC50	3089281 to 5325015	4165197 to 6069371	2441243 to 4310090	3582648 to 4205266	2838176 to 4336702	3048305 to 3437824	4031221 to 4176338	2957922 to 4433375
Goodness of Fit
Degrees of Freedom	5	5	5	5	5	5	5	5
R squared	0.9513	0.9583	0.9336	0.9855	0.956	0.9953	0.9992	0.9523
Sum of Squares	0.05053	0.04461	0.0581	0.0169	0.04381	0.005117	0.000982	0.04975
Sy.x	0.1005	0.09446	0.1078	0.05813	0.09361	0.03199	0.01401	0.09975
Constraints
Bottom	Bottom = 0	Bottom = 0	Bottom = 0	Bottom = 0	Bottom = 0	Bottom = 0	Bottom = 0	Bottom = 0
Top	Top = 1	Top = 1	Top = 1	Top = 1	Top = 1	Top = 1	Top = 1	Top = 1
Number of points
# of X values	12	12	11	11	11	9	9	9
# Y values analyzed	7	7	7	7	7	7	7	7
WT_FL_WT
	2016_04_19_0004	2016_04_20_0009	2016_04_21_0003	2016_04_21_0006	2016_04_21_0011	2016_04_21_0015	2016_04_28_0004	2016_04_28_0010	2016_04_28_0016	2016_05_06_0003	2016_05_06_0008	2016_05_06_0014	2016_05_06_0018			LogEC50	HillSlope
log(agonist) vs. response -- Variable slope (four parameters)															2016_04_19_0004	6.467	-3.598
Best-fit values															2016_04_20_0009	6.587	-5.594
Bottom	= 0,000	= 0,000	= 0,000	= 0,000	= 0,000	= 0,000	= 0,000	= 0,000	= 0,000	= 0,000	= 0,000	= 0,000	= 0,000		2016_04_21_0003	6.646	-4.504
Top	= 1,000	= 1,000	= 1,000	= 1,000	= 1,000	= 1,000	= 1,000	= 1,000	= 1,000	= 1,000	= 1,000	= 1,000	= 1,000		2016_04_21_0006	6.552	-10.85
LogEC50	6.467	6.587	6.646	6.552	6.565	6.649	6.635	6.61	6.624	6.645	6.64	6.636	6.711		2016_04_21_0011	6.565	-6.385
HillSlope	-3.598	-5.594	-4.504	-10.85	-6.385	-7.687	-13.3	-8.891	-13.71	-7.36	-17.28	-6.171	-9.29		2016_04_21_0015	6.649	-7.687
EC50	2929708	3864916	4428317	3561416	3672971	4458902	4319028	4076006	4203531	4418456	4369231	4324532	5135751		2016_04_28_0004	6.635	-13.3
Span	= 1,000	= 1,000	= 1,000	= 1,000	= 1,000	= 1,000	= 1,000	= 1,000	= 1,000	= 1,000	= 1,000	= 1,000	= 1,000		2016_04_28_0010	6.61	-8.891
95% CI (profile likelihood)															2016_04_28_0016	6.624	-13.71
LogEC50	6,356 to 6,570	6,501 to 6,682	6,600 to 6,686	6,500 to ???	6,524 to 6,600	6,556 to 6,697	??? to 6,656	6,559 to 6,637	??? to 6,669	6,579 to 6,686	???	6,542 to 6,701	6,648 to 6,756		2016_05_06_0003	6.645	-7.36
HillSlope	??? to -1,700	??? to -1,989	-6,843 to -3,064	??? to -5,652	-13,45 to -4,219	-21,30 to -2,558	??? to -8,333	??? to -4,225	??? to -2,759	-15,24 to -3,286	??? to -3,349	-17,64 to -2,479	??? to -3,782		2016_05_06_0008	6.64	-17.28
EC50	2270878 to 3715858	3166447 to 4810459	3978002 to 4858015	3162607 to ???	3345307 to 3984824	3599799 to 4982484	??? to 4526000	3625993 to 4331125	??? to 4663411	3791563 to 4848847	???	3479931 to 5026496	4451186 to 5698112		2016_05_06_0014	6.636	-6.171
Goodness of Fit															2016_05_06_0018	6.711	-9.29
Degrees of Freedom	5	5	5	5	5	5	5	5	5	5	5	5	5
R squared	0.9514	0.9364	0.9827	0.9838	0.9863	0.9523	0.9899	0.9848	0.9426	0.9688	0.9219	0.9275	0.9526
Sum of Squares	0.05388	0.07449	0.01801	0.01863	0.01629	0.05018	0.01272	0.01729	0.06359	0.03422	0.09336	0.07131	0.05785
Sy.x	0.1038	0.1221	0.06001	0.06104	0.05709	0.1002	0.05043	0.0588	0.1128	0.08273	0.1366	0.1194	0.1076
Constraints
Bottom	Bottom = 0	Bottom = 0	Bottom = 0	Bottom = 0	Bottom = 0	Bottom = 0	Bottom = 0	Bottom = 0	Bottom = 0	Bottom = 0	Bottom = 0	Bottom = 0	Bottom = 0
Top	Top = 1	Top = 1	Top = 1	Top = 1	Top = 1	Top = 1	Top = 1	Top = 1	Top = 1	Top = 1	Top = 1	Top = 1	Top = 1
Number of points
# of X values	12	12	11	11	11	11	9	9	9	9	9	9	9
# Y values analyzed	7	7	7	7	7	7	7	7	7	7	7	7	7
WT_WT_FL
	2016_04_20_0005	2016_04_20_0013	2016_04_21_0004	2016_04_21_0005	2016_04_21_0010	2016_04_28_0006	2016_04_28_0011	2016_04_28_0017	2016_05_06_0004	2016_05_06_0009						LogEC50	HillSlope
log(agonist) vs. response -- Variable slope (four parameters)															2016_04_20_0005	6.562	-10.01
Best-fit values															2016_04_20_0013	6.693	-5.75
Bottom	= 0,000	= 0,000	= 0,000	= 0,000	= 0,000	= 0,000	= 0,000	= 0,000	= 0,000	= 0,000					2016_04_21_0004	6.692	-10.02
Top	= 1,000	= 1,000	= 1,000	= 1,000	= 1,000	= 1,000	= 1,000	= 1,000	= 1,000	= 1,000					2016_04_21_0005	6.561	-3.96
LogEC50	6.562	6.693	6.692	6.561	6.663	6.638	6.568	6.629	6.589	6.602					2016_04_21_0010	6.663	-5.498
HillSlope	-10.01	-5.75	-10.02	-3.96	-5.498	-16.9	-5.827	-10.5	-4.014	-4.758					2016_04_28_0006	6.638	-16.9
EC50	3650247	4937106	4921416	3636824	4598587	4347466	3702249	4260377	3879760	3994919					2016_04_28_0011	6.568	-5.827
Span	= 1,000	= 1,000	= 1,000	= 1,000	= 1,000	= 1,000	= 1,000	= 1,000	= 1,000	= 1,000					2016_04_28_0017	6.629	-10.5
95% CI (profile likelihood)															2016_05_06_0004	6.589	-4.014
LogEC50	???	6,605 to 6,773	6,663 to 6,720	6,396 to 6,668	6,629 to 6,692	??? to 6,654	6,510 to 6,618	6,617 to 6,642	6,458 to 6,684	6,504 to 6,669					2016_05_06_0009	6.602	-4.758
HillSlope	??? to -1,545	??? to -2,437	??? to -5,606	??? to -1,689	-8,088 to -3,809	??? to -12,19	??? to -3,622	-14,23 to -7,824	??? to -1,909	??? to -2,431
EC50	???	4029132 to 5930604	4602217 to 5246572	2488836 to 4652558	4255105 to 4918608	??? to 4505335	3233618 to 4144859	4144397 to 4382208	2869629 to 4829729	3190892 to 4669025
Goodness of Fit
Degrees of Freedom	5	5	5	5	5	5	5	5	5	5
R squared	0.9034	0.9531	0.9811	0.9169	0.9885	0.9951	0.9811	0.9965	0.9226	0.9534
Sum of Squares	0.1214	0.05241	0.02268	0.08435	0.01245	0.006761	0.02085	0.004285	0.07656	0.04741
Sy.x	0.1558	0.1024	0.06736	0.1299	0.0499	0.03677	0.06458	0.02928	0.1237	0.09738
Constraints
Bottom	Bottom = 0	Bottom = 0	Bottom = 0	Bottom = 0	Bottom = 0	Bottom = 0	Bottom = 0	Bottom = 0	Bottom = 0	Bottom = 0
Top	Top = 1	Top = 1	Top = 1	Top = 1	Top = 1	Top = 1	Top = 1	Top = 1	Top = 1	Top = 1
Number of points
# of X values	12	12	11	11	11	9	9	9	9	9
# Y values analyzed	7	7	7	7	7	7	7	7	7	7
FL_FL_WT
	2016_05_12_0000	2016_05_12_0006	2016_05_12_0009	2016_05_19_0001	2016_05_19_0003	2016_05_19_0006	2016_05_25_0000	2016_05_25_0001	2016_05_25_0002	2016_05_25_0003	2016_06_01_0002	2016_06_01_0004	2016_06_01_0008			LogEC50	HillSlope
log(agonist) vs. response -- Variable slope (four parameters)															2016_05_12_0000	6.482	-3.749
Best-fit values															2016_05_12_0006	6.532	-5.573
Bottom	= 0,000	= 0,000	= 0,000	= 0,000	= 0,000	= 0,000	= 0,000	= 0,000	= 0,000	= 0,000	= 0,000	= 0,000	= 0,000		2016_05_12_0009	6.349	-5.231
Top	= 1,000	= 1,000	= 1,000	= 1,000	= 1,000	= 1,000	= 1,000	= 1,000	= 1,000	= 1,000	= 1,000	= 1,000	= 1,000		2016_05_19_0001	6.49	-10.48
LogEC50	6.482	6.532	6.349	6.49	6.428	6.443	6.469	6.447	6.568	6.429	6.488	6.457	6.496		2016_05_19_0003	6.428	-5.107
HillSlope	-3.749	-5.573	-5.231	-10.48	-5.107	-3.208	-4.302	-3.541	-3.957	-3.231	-9.841	-11.36	-12.16		2016_05_19_0006	6.443	-3.208
EC50	3035891	3400674	2233999	3088620	2678209	2771024	2941826	2797656	3697477	2686400	3073975	2865348	3135764		2016_05_25_0000	6.469	-4.302
Span	= 1,000	= 1,000	= 1,000	= 1,000	= 1,000	= 1,000	= 1,000	= 1,000	= 1,000	= 1,000	= 1,000	= 1,000	= 1,000		2016_05_25_0001	6.447	-3.541
95% CI (profile likelihood)															2016_05_25_0002	6.568	-3.957
LogEC50	6,405 to 6,557	6,493 to 6,573	6,325 to 6,370	6,349 to 6,570	6,370 to 6,477	6,343 to 6,535	6,409 to 6,522	6,280 to 6,567	6,483 to 6,647	6,219 to 6,588	6,465 to 6,508	6,434 to 6,480	6,487 to 6,505		2016_05_25_0003	6.429	-3.231
HillSlope	-8,281 to -1,976	-9,501 to -3,448	-7,139 to -3,827	??? to -1,746	-9,233 to -3,008	-6,245 to -1,765	-9,840 to -2,473	-21,27 to -1,393	-10,37 to -1,967	-11,88 to -1,022	-21,90 to -6,557	-20,24 to -6,587	-19,50 to -9,370		2016_06_01_0002	6.488	-9.841
EC50	2538361 to 3608894	3114502 to 3740802	2112552 to 2344592	2233529 to 3718354	2342268 to 2995804	2203957 to 3427622	2563166 to 3328687	1907264 to 3690289	3039959 to 4435511	1657661 to 3872727	2918246 to 3224530	2715762 to 3020058	3072362 to 3201931		2016_06_01_0004	6.457	-11.36
Goodness of Fit															2016_06_01_0008	6.496	-12.16
Degrees of Freedom	5	5	4	5	5	5	5	5	5	5	5	5	5
R squared	0.9392	0.9734	0.9946	0.8734	0.9692	0.9316	0.9657	0.8703	0.9316	0.8105	0.9896	0.9864	0.9977
Sum of Squares	0.0508	0.02218	0.004079	0.1359	0.03056	0.06263	0.03205	0.1314	0.06149	0.1835	0.0129	0.0164	0.00311
Sy.x	0.1008	0.0666	0.03194	0.1649	0.07818	0.1119	0.08007	0.1621	0.1109	0.1916	0.0508	0.05727	0.02494
Constraints
Bottom	Bottom = 0	Bottom = 0	Bottom = 0	Bottom = 0	Bottom = 0	Bottom = 0	Bottom = 0	Bottom = 0	Bottom = 0	Bottom = 0	Bottom = 0	Bottom = 0	Bottom = 0
Top	Top = 1	Top = 1	Top = 1	Top = 1	Top = 1	Top = 1	Top = 1	Top = 1	Top = 1	Top = 1	Top = 1	Top = 1	Top = 1
Number of points
# of X values	11	11	11	10	10	10	10	10	10	10	10	10	10
# Y values analyzed	7	7	6	7	7	7	7	7	7	7	7	7	7
FL_WT_FL
	2016_05_19_0000	2016_05_19_0002	2016_05_19_0004	2016_05_24_0001	2016_05_24_0003	2016_05_24_0005	2016_05_31_0001	2016_05_31_0007								LogEC50	HillSlope
log(agonist) vs. response -- Variable slope (four parameters)															2016_05_19_0000	6.454	-5.3
Best-fit values															2016_05_19_0002	6.474	-6.174
Bottom	= 0,000	= 0,000	= 0,000	= 0,000	= 0,000	= 0,000	= 0,000	= 0,000							2016_05_19_0004	6.491	-4.599
Top	= 1,000	= 1,000	= 1,000	= 1,000	= 1,000	= 1,000	= 1,000	= 1,000							2016_05_24_0001	6.426	-5.411
LogEC50	6.454	6.474	6.491	6.426	6.413	6.376	6.377	6.419							2016_05_24_0003	6.413	-5.806
HillSlope	-5.3	-6.174	-4.599	-5.411	-5.806	-4.662	-6.236	-4.5							2016_05_24_0005	6.376	-4.662
EC50	2844662	2975951	3096682	2668358	2588482	2378670	2379929	2625416							2016_05_31_0001	6.377	-6.236
Span	= 1,000	= 1,000	= 1,000	= 1,000	= 1,000	= 1,000	= 1,000	= 1,000							2016_05_31_0007	6.419	-4.5
95% CI (profile likelihood)
LogEC50	6,422 to 6,483	6,460 to 6,487	6,434 to 6,538	6,378 to 6,469	6,398 to 6,427	6,353 to 6,399	6,341 to 6,407	6,372 to 6,459
HillSlope	-7,542 to -3,811	-7,666 to -5,033	-8,786 to -2,636	-11,72 to -3,208	-7,215 to -4,802	-5,893 to -3,796	-12,68 to -4,214	-7,443 to -3,073
EC50	2639538 to 3041306	2880979 to 3072030	2715001 to 3453004	2386118 to 2945644	2497659 to 2675489	2252296 to 2504220	2193561 to 2553199	2353087 to 2874755
Goodness of Fit
Degrees of Freedom	5	5	5	5	5	5	5	5
R squared	0.9894	0.997	0.9696	0.9756	0.9974	0.9952	0.9888	0.9843
Sum of Squares	0.0116	0.003309	0.02849	0.02531	0.002832	0.00473	0.01264	0.01544
Sy.x	0.04817	0.02573	0.07548	0.07115	0.0238	0.03076	0.05027	0.05558
Constraints
Bottom	Bottom = 0	Bottom = 0	Bottom = 0	Bottom = 0	Bottom = 0	Bottom = 0	Bottom = 0	Bottom = 0
Top	Top = 1	Top = 1	Top = 1	Top = 1	Top = 1	Top = 1	Top = 1	Top = 1
Number of points
# of X values	10	10	10	10	10	10	10	10
# Y values analyzed	7	7	7	7	7	7	7	7
WT_FL_FL
	2016_05_10_0002	2016_05_10_0005	2016_05_12_0008	2016_05_24_0002	2016_05_24_0004	2016_05_31_0000	2016_05_31_0002	2016_05_31_0011	2016_05_31_0012	2016_06_01_0003						LogEC50	HillSlope
log(agonist) vs. response -- Variable slope (four parameters)															2016_05_10_0002	6.36	-3.142
Best-fit values															2016_05_10_0005	6.482	-4.716
Bottom	= 0,000	= 0,000	= 0,000	= 0,000	= 0,000	= 0,000	= 0,000	= 0,000	= 0,000	= 0,000					2016_05_12_0008	6.38	-12.76
Top	= 1,000	= 1,000	= 1,000	= 1,000	= 1,000	= 1,000	= 1,000	= 1,000	= 1,000	= 1,000					2016_05_24_0002	6.551	-5.11
LogEC50	6.36	6.482	6.38	6.551	6.563	6.282	6.381	6.454	6.37	6.523					2016_05_24_0004	6.563	-7.168
HillSlope	-3.142	-4.716	-12.76	-5.11	-7.168	-3.793	-3.381	-13.56	-5.353	-10.63					2016_05_31_0000	6.282	-3.793
EC50	2292355	3031746	2401553	3553099	3656623	1912566	2404640	2846801	2341868	3332363					2016_05_31_0002	6.381	-3.381
Span	= 1,000	= 1,000	= 1,000	= 1,000	= 1,000	= 1,000	= 1,000	= 1,000	= 1,000	= 1,000					2016_05_31_0011	6.454	-13.56
95% CI (profile likelihood)															2016_05_31_0012	6.37	-5.353
LogEC50	6,315 to 6,401	6,431 to 6,532	6,332 to 6,455	6,465 to 6,642	6,537 to 6,588	6,204 to 6,357	6,299 to 6,453	6,411 to 6,496	6,296 to 6,436	6,493 to 6,556					2016_06_01_0003	6.523	-10.63
HillSlope	-4,358 to -2,324	-8,129 to -2,840	??? to -2,815	-16,02 to -1,733	-11,44 to -4,806	-8,491 to -2,248	-5,793 to -2,141	??? to -3,775	??? to -2,655	??? to -5,647
EC50	2064209 to 2518345	2699342 to 3403766	2145825 to 2851499	2916249 to 4384706	3444650 to 3872869	1598514 to 2274735	1989581 to 2835823	2575224 to 3130257	1977474 to 2728152	3110556 to 3601038
Goodness of Fit
Degrees of Freedom	5	5	5	5	5	5	5	5	5	5
R squared	0.985	0.965	0.926	0.89	0.988	0.9555	0.9596	0.9429	0.9525	0.9748
Sum of Squares	0.01222	0.03108	0.07992	0.08564	0.01314	0.03706	0.03638	0.06634	0.04877	0.02941
Sy.x	0.04944	0.07884	0.1264	0.1309	0.05127	0.08609	0.0853	0.1152	0.09876	0.07669
Constraints
Bottom	Bottom = 0	Bottom = 0	Bottom = 0	Bottom = 0	Bottom = 0	Bottom = 0	Bottom = 0	Bottom = 0	Bottom = 0	Bottom = 0
Top	Top = 1	Top = 1	Top = 1	Top = 1	Top = 1	Top = 1	Top = 1	Top = 1	Top = 1	Top = 1
Number of points
# of X values	11	11	11	10	10	10	10	10	10	10
# Y values analyzed	7	7	7	7	7	7	7	7	7	7
FL_FL_FL
	2016_08_17_0003	2016_08_17_0005	2016_08_17_0008	2016_08_17_0009	2016_08_19_0001	2016_08_19_0003	2016_08_19_0005									LogEC50	HillSlope
log(agonist) vs. response -- Variable slope (four parameters)															2016_08_17_0003	6.228	-6.832
Best-fit values															2016_08_17_0005	6.065	-2.743
Bottom	= 0,000	= 0,000	= 0,000	= 0,000	= 0,000	= 0,000	= 0,000								2016_08_17_0008	6.17	-4.283
Top	= 1,000	= 1,000	= 1,000	= 1,000	= 1,000	= 1,000	= 1,000								2016_08_17_0009	6.114	-3.566
LogEC50	6.228	6.065	6.17	6.114	6.233	6.299	6.163								2016_08_19_0001	6.233	-3.547
HillSlope	-6.832	-2.743	-4.283	-3.566	-3.547	-3.305	-2.769								2016_08_19_0003	6.299	-3.305
EC50	1689219	1161429	1479045	1300289	1708534	1990128	1457034								2016_08_19_0005	6.163	-2.769
Span	= 1,000	= 1,000	= 1,000	= 1,000	= 1,000	= 1,000	= 1,000
95% CI (profile likelihood)
LogEC50	6,190 to ???	5,998 to 6,129	6,057 to 6,256	6,041 to 6,180	6,160 to 6,295	6,230 to 6,365	6,078 to 6,239
HillSlope	??? to -4,762	-3,902 to -1,993	-11,91 to -2,007	-6,336 to -2,323	-6,785 to -2,158	-5,609 to -2,116	-4,577 to -1,820
EC50	1548756 to ???	994910 to 1344584	1139912 to 1804948	1097754 to 1513295	1443921 to 1972840	1700152 to 2318055	1197627 to 1734543
Goodness of Fit
Degrees of Freedom	5	5	5	5	5	5	5
R squared	0.9919	0.982	0.9543	0.978	0.9754	0.9743	0.9726
Sum of Squares	0.01058	0.01629	0.04974	0.02301	0.02497	0.02645	0.02559
Sy.x	0.046	0.05708	0.09974	0.06783	0.07066	0.07274	0.07154
Constraints
Bottom	Bottom = 0	Bottom = 0	Bottom = 0	Bottom = 0	Bottom = 0	Bottom = 0	Bottom = 0
Top	Top = 1	Top = 1	Top = 1	Top = 1	Top = 1	Top = 1	Top = 1
Number of points
# of X values	7	7	7	7	7	7	7
# Y values analyzed	7	7	7	7	7	7	7
F350L																LogEC50	HillSlope
	2016_08_17_0000	2016_08_17_0002	2016_08_17_0007	2016_08_19_0000	2016_08_19_0002	2016_08_19_0004	2016_08_19_0006								2016_08_17_0000	6.336	-6.469
log(agonist) vs. response -- Variable slope (four parameters)															2016_08_17_0002	6.249	-3.255
Best-fit values															2016_08_17_0007	6.036	-2.671
Bottom	= 0,000	= 0,000	= 0,000	= 0,000	= 0,000	= 0,000	= 0,000								2016_08_19_0000	6.437	-3.946
Top	= 1,000	= 1,000	= 1,000	= 1,000	= 1,000	= 1,000	= 1,000								2016_08_19_0002	6.346	-2.952
LogEC50	6.336	6.249	6.036	6.437	6.346	6.401	6.337								2016_08_19_0004	6.401	-4.629
HillSlope	-6.469	-3.255	-2.671	-3.946	-2.952	-4.629	-4.684								2016_08_19_0006	6.337	-4.684
EC50	2165902	1774995	1085245	2737812	2219630	2517319	2173749
Span	= 1,000	= 1,000	= 1,000	= 1,000	= 1,000	= 1,000	= 1,000
95% CI (profile likelihood)
LogEC50	6,320 to 6,350	6,194 to 6,302	5,989 to 6,080	6,383 to 6,495	6,271 to 6,417	6,367 to 6,437	6,298 to 6,375
HillSlope	-8,614 to -4,849	-4,732 to -2,321	-3,396 to -2,136	-6,684 to -2,513	-5,197 to -1,854	-7,193 to -3,218	-7,400 to -3,138
EC50	2091690 to 2237214	1563134 to 2005188	975647 to 1202563	2413838 to 3126171	1864454 to 2614825	2328561 to 2737226	1987673 to 2374042
Goodness of Fit
Degrees of Freedom	5	5	5	5	5	5	5
R squared	0.9973	0.9845	0.9911	0.9767	0.9698	0.9893	0.9875
Sum of Squares	0.003236	0.01628	0.00756	0.02201	0.02734	0.01102	0.01404
Sy.x	0.02544	0.05706	0.03888	0.06634	0.07395	0.04696	0.05299
Constraints
Bottom	Bottom = 0	Bottom = 0	Bottom = 0	Bottom = 0	Bottom = 0	Bottom = 0	Bottom = 0
Top	Top = 1	Top = 1	Top = 1	Top = 1	Top = 1	Top = 1	Top = 1
Number of points
# of X values	7	7	7	7	7	7	7
# Y values analyzed	7	7	7	7	7	7	7
Non-linear fits to Row stats
	WT	WT/WT/WT	FL/WT/WT	WT/FL/WT	WT/WT/FL	FL/FL/WT	FL/WT/FL	WT/FL/FL	FL/FL/FL	F350L
log(agonist) vs. response -- Variable slope (four parameters)
Best-fit values
Bottom	= 0,000	= 0,000	= 0,000	= 0,000	= 0,000	= 0,000	= 0,000	= 0,000	= 0,000	= 0,000
Top	= 1,000	= 1,000	= 1,000	= 1,000	= 1,000	= 1,000	= 1,000	= 1,000	= 1,000	= 1,000
LogEC50	6.697	6.716	6.573	6.623	6.634	6.471	6.429	6.442	6.182	6.318
HillSlope	-7.198	-5.679	-4.373	-6.415	-7.695	-4.587	-4.861	-3.816	-3.419	-3.173
EC50	4980642	5200177	3742365	4195636	4309012	2956958	2682777	2764265	1522046	2078302
Span	= 1,000	= 1,000	= 1,000	= 1,000	= 1,000	= 1,000	= 1,000	= 1,000	= 1,000	= 1,000
95% CI (profile likelihood)
LogEC50	6,684 to 6,711	6,701 to 6,731	6,542 to 6,602	6,604 to 6,638	6,615 to 6,649	6,450 to 6,490	6,414 to 6,443	6,405 to 6,474	6,151 to 6,212	6,279 to 6,354
HillSlope	-9,228 to -5,743	-6,935 to -4,685	-5,735 to -3,493	-8,452 to -4,948	-10,49 to -5,340	-5,756 to -3,676	-5,754 to -4,165	-5,333 to -2,801	-4,292 to -2,777	-4,305 to -2,433
EC50	4826537 to 5134902	5024875 to 5378900	3483435 to 3997569	4018161 to 4347288	4119249 to 4457621	2816926 to 3093825	2591949 to 2771337	2538996 to 2975273	1417035 to 1628756	1901089 to 2261778
Goodness of Fit
Degrees of Freedom	55	58	43	77	57	77	54	56	47	47
R squared	0.9375	0.9342	0.9054	0.9104	0.9158	0.8667	0.9618	0.7914	0.9339	0.8841
Sum of Squares	0.589	0.6027	0.5126	1.041	0.7173	1.509	0.3228	1.629	0.4945	0.8655
Sy.x	0.1035	0.1019	0.1092	0.1163	0.1122	0.14	0.07731	0.1705	0.1026	0.1357
Constraints
Bottom	Bottom = 0	Bottom = 0	Bottom = 0	Bottom = 0	Bottom = 0	Bottom = 0	Bottom = 0	Bottom = 0	Bottom = 0	Bottom = 0
Top	Top = 1	Top = 1	Top = 1	Top = 1	Top = 1	Top = 1	Top = 1	Top = 1	Top = 1	Top = 1
Number of points
# of X values	63	66	51	85	65	85	60	64	56	56
# Y values analyzed	57	60	45	79	59	79	56	58	49	49
